# Supplementary material for: Reconstruction and Validation of a Genome-Scale Metabolic Model for the Filamentous Fungus Neurospora crassa Using FARM
Source: PLoS Comput Biol. 2013 Jul 18;9(7):e1003126. doi: 10.1371/journal.pcbi.1003126 (PMC3730674; doi:10.1371/journal.pcbi.1003126)
Supplement: Table S1 — Describes our evidence source for our growth/no-growth annotation of mutants, nutrient rescues, and synthetic lethals. (XLSX) [file pcbi.1003126.s007.xlsx]

## Sheet: README
Locus refers to the version 5 release of the Neurospora gene calls
Gene refers to the gene symbol or enzyme name of the gene.
TrainOrTest? Is Train if the gene is part of the training set. Test if it is part of the test set.
GROWTH? Is NORMAL if the gene is nonessential, NONE if the gene is essential
Media describes the nutrient media under which essentiality was observed
citations refers to the publication which describes how the observation was made
comments gives additional information that confirms the phenotype
URL refers to the NeurosporaCyc page where additional information about that gene can be found.

## Sheet: Essentiality training set
Locus	Gene	TrainOrTest?	Growth?	Media	citations	comments	URL
NCU00227.5	mitochondrial cation transporter	train	NORMAL	Vogels Medium N	Dunlap07	Training set growth phenotypes obtained from PO1 Phenotype collection	http://neurosporacyc.broadinstitute.org/NC10/NEW-IMAGE?type=GENE&object=NCU00227
NCU00591.5	methylcrotonoyl-CoA carboxylase subunit alpha	train	NORMAL	Vogels Medium N	Dunlap07	Training set growth phenotypes obtained from PO1 Phenotype collection	http://neurosporacyc.broadinstitute.org/NC10/NEW-IMAGE?type=GENE&object=NCU00591
NCU01348.5	agmatinase	train	NORMAL	Vogels Medium N	Dunlap07	Training set growth phenotypes obtained from PO1 Phenotype collection	http://neurosporacyc.broadinstitute.org/NC10/NEW-IMAGE?type=GENE&object=NCU01348
NCU02663.5	L-lysine 2,3-aminomutase	train	NORMAL	Vogels Medium N	Dunlap07	Training set growth phenotypes obtained from PO1 Phenotype collection	http://neurosporacyc.broadinstitute.org/NC10/NEW-IMAGE?type=GENE&object=NCU02663
NCU02299.5	NADP-dependent leukotriene B4 12-hydroxydehydrogenase	train	NORMAL	Vogels Medium N	Dunlap07	Training set growth phenotypes obtained from PO1 Phenotype collection	http://neurosporacyc.broadinstitute.org/NC10/NEW-IMAGE?type=GENE&object=NCU02299
NCU03880.5	phosphorylcholine transferase	train	NORMAL	Vogels Medium N	Dunlap07	Training set growth phenotypes obtained from PO1 Phenotype collection	http://neurosporacyc.broadinstitute.org/NC10/NEW-IMAGE?type=GENE&object=NCU03880
NCU09115.5	cytochrome P450 52A11	train	NORMAL	Vogels Medium N	Dunlap07	Training set growth phenotypes obtained from PO1 Phenotype collection	http://neurosporacyc.broadinstitute.org/NC10/NEW-IMAGE?type=GENE&object=NCU09115
NCU05220.5	ATP synthase subunit F	train	NORMAL	Vogels Medium N	Dunlap07	Training set growth phenotypes obtained from PO1 Phenotype collection	http://neurosporacyc.broadinstitute.org/NC10/NEW-IMAGE?type=GENE&object=NCU05220
NCU00173.5	esterase D	train	NORMAL	Vogels Medium N	Dunlap07	Training set growth phenotypes obtained from PO1 Phenotype collection	http://neurosporacyc.broadinstitute.org/NC10/NEW-IMAGE?type=GENE&object=NCU00173
NCU05985.5	chol-6	train	NORMAL	Vogels Medium N	Dunlap07	Training set growth phenotypes obtained from PO1 Phenotype collection	http://neurosporacyc.broadinstitute.org/NC10/NEW-IMAGE?type=GENE&object=NCU05985
NCU03784.5	cation chloride cotransporter	train	NORMAL	Vogels Medium N	Dunlap07	Training set growth phenotypes obtained from PO1 Phenotype collection	http://neurosporacyc.broadinstitute.org/NC10/NEW-IMAGE?type=GENE&object=NCU03784
NCU09864.5	2-oxoisovalerate dehydrogenase alpha subunit	train	NORMAL	Vogels Medium N	Dunlap07	Training set growth phenotypes obtained from PO1 Phenotype collection	http://neurosporacyc.broadinstitute.org/NC10/NEW-IMAGE?type=GENE&object=NCU09864
NCU03868.5	conserved hypothetical protein	train	NORMAL	Vogels Medium N	Dunlap07	Training set growth phenotypes obtained from PO1 Phenotype collection	http://neurosporacyc.broadinstitute.org/NC10/NEW-IMAGE?type=GENE&object=NCU03868
NCU01765.5	nuo78	train	NORMAL	Vogels Medium N	Dunlap07	Training set growth phenotypes obtained from PO1 Phenotype collection	http://neurosporacyc.broadinstitute.org/NC10/NEW-IMAGE?type=GENE&object=NCU01765
NCU09058.5	enoyl-CoA hydratase	train	NORMAL	Vogels Medium N	Dunlap07	Training set growth phenotypes obtained from PO1 Phenotype collection	http://neurosporacyc.broadinstitute.org/NC10/NEW-IMAGE?type=GENE&object=NCU09058
NCU00606.5	short-chain alcohol dehydrogenase	train	NORMAL	Vogels Medium N	Dunlap07	Training set growth phenotypes obtained from PO1 Phenotype collection	http://neurosporacyc.broadinstitute.org/NC10/NEW-IMAGE?type=GENE&object=NCU00606
NCU00403.5	dTDP-D-glucose 4,6-dehydratase	train	NORMAL	Vogels Medium N	Dunlap07	Training set growth phenotypes obtained from PO1 Phenotype collection	http://neurosporacyc.broadinstitute.org/NC10/NEW-IMAGE?type=GENE&object=NCU00403
NCU00580.5	acyl-CoA thioesterase	train	NORMAL	Vogels Medium N	Dunlap07	Training set growth phenotypes obtained from PO1 Phenotype collection	http://neurosporacyc.broadinstitute.org/NC10/NEW-IMAGE?type=GENE&object=NCU00580
NCU02550.5	alpha-galactosidase	train	NORMAL	Vogels Medium N	Dunlap07	Training set growth phenotypes obtained from PO1 Phenotype collection	http://neurosporacyc.broadinstitute.org/NC10/NEW-IMAGE?type=GENE&object=NCU02550
NCU02126.5	isovaleryl-CoA dehydrogenase	train	NORMAL	Vogels Medium N	Dunlap07	Training set growth phenotypes obtained from PO1 Phenotype collection	http://neurosporacyc.broadinstitute.org/NC10/NEW-IMAGE?type=GENE&object=NCU02126
NCU03761.5	L-serine (L-threonine) deaminase	train	NORMAL	Vogels Medium N	Dunlap07	Training set growth phenotypes obtained from PO1 Phenotype collection	http://neurosporacyc.broadinstitute.org/NC10/NEW-IMAGE?type=GENE&object=NCU03761
NCU08515.5	vma-2	train	NORMAL	Vogels Medium N	Dunlap07	Training set growth phenotypes obtained from PO1 Phenotype collection	http://neurosporacyc.broadinstitute.org/NC10/NEW-IMAGE?type=GENE&object=NCU08515
NCU00355.5	cat-3	train	NORMAL	Vogels Medium N	Dunlap07	Training set growth phenotypes obtained from PO1 Phenotype collection	http://neurosporacyc.broadinstitute.org/NC10/NEW-IMAGE?type=GENE&object=NCU00355
NCU00761.5	cea-4	train	NORMAL	Vogels Medium N	Dunlap07	Training set growth phenotypes obtained from PO1 Phenotype collection	http://neurosporacyc.broadinstitute.org/NC10/NEW-IMAGE?type=GENE&object=NCU00761
NCU00642.5	gh35-1	train	NORMAL	Vogels Medium N	Dunlap07	Training set growth phenotypes obtained from PO1 Phenotype collection	http://neurosporacyc.broadinstitute.org/NC10/NEW-IMAGE?type=GENE&object=NCU00642
NCU00810.5	gh2-3	train	NORMAL	Vogels Medium N	Dunlap07	Training set growth phenotypes obtained from PO1 Phenotype collection	http://neurosporacyc.broadinstitute.org/NC10/NEW-IMAGE?type=GENE&object=NCU00810
NCU08439.5	leptomycin B resistance protein pmd1	train	NORMAL	Vogels Medium N	Dunlap07	Training set growth phenotypes obtained from PO1 Phenotype collection	http://neurosporacyc.broadinstitute.org/NC10/NEW-IMAGE?type=GENE&object=NCU08439
NCU04195.5	purine-cytosine permease FCY21	train	NORMAL	Vogels Medium N	Dunlap07	Training set growth phenotypes obtained from PO1 Phenotype collection	http://neurosporacyc.broadinstitute.org/NC10/NEW-IMAGE?type=GENE&object=NCU04195
NCU01830.5	4-hydroxyphenylpyruvate dioxygenase	train	NORMAL	Vogels Medium N	Dunlap07	Training set growth phenotypes obtained from PO1 Phenotype collection	http://neurosporacyc.broadinstitute.org/NC10/NEW-IMAGE?type=GENE&object=NCU01830
NCU02734.5	citrate lyase beta subunit	train	NORMAL	Vogels Medium N	Dunlap07	Training set growth phenotypes obtained from PO1 Phenotype collection	http://neurosporacyc.broadinstitute.org/NC10/NEW-IMAGE?type=GENE&object=NCU02734
NCU00670.5	nuo9.5	train	NORMAL	Vogels Medium N	Dunlap07	Training set growth phenotypes obtained from PO1 Phenotype collection	http://neurosporacyc.broadinstitute.org/NC10/NEW-IMAGE?type=GENE&object=NCU00670
NCU03813.5	fdh	train	NORMAL	Vogels Medium N	Dunlap07	Training set growth phenotypes obtained from PO1 Phenotype collection	http://neurosporacyc.broadinstitute.org/NC10/NEW-IMAGE?type=GENE&object=NCU03813
NCU03877.5	C-1-tetrahydrofolate synthase	train	NORMAL	Vogels Medium N	Dunlap07	Training set growth phenotypes obtained from PO1 Phenotype collection	http://neurosporacyc.broadinstitute.org/NC10/NEW-IMAGE?type=GENE&object=NCU03877
NCU02280.5	nuo21.3b	train	NORMAL	Vogels Medium N	Dunlap07	Training set growth phenotypes obtained from PO1 Phenotype collection	http://neurosporacyc.broadinstitute.org/NC10/NEW-IMAGE?type=GENE&object=NCU02280
NCU03846.5	DRAP deaminase	train	NORMAL	Vogels Medium N	Dunlap07	Training set growth phenotypes obtained from PO1 Phenotype collection	http://neurosporacyc.broadinstitute.org/NC10/NEW-IMAGE?type=GENE&object=NCU03846
NCU02097.5	short chain dehydrogenase	train	NORMAL	Vogels Medium N	Dunlap07	Training set growth phenotypes obtained from PO1 Phenotype collection	http://neurosporacyc.broadinstitute.org/NC10/NEW-IMAGE?type=GENE&object=NCU02097
NCU02542.5	emp-1	train	NORMAL	Vogels Medium N	Dunlap07	Training set growth phenotypes obtained from PO1 Phenotype collection	http://neurosporacyc.broadinstitute.org/NC10/NEW-IMAGE?type=GENE&object=NCU02542
NCU03076.5	delta-1-pyrroline-5-carboxylate dehydrogenase	train	NORMAL	Vogels Medium N	Dunlap07	Training set growth phenotypes obtained from PO1 Phenotype collection	http://neurosporacyc.broadinstitute.org/NC10/NEW-IMAGE?type=GENE&object=NCU03076
NCU09758.5	ras guanine-nucleotide exchange protein	train	NORMAL	Vogels Medium N	Dunlap07	Training set growth phenotypes obtained from PO1 Phenotype collection	http://neurosporacyc.broadinstitute.org/NC10/NEW-IMAGE?type=GENE&object=NCU09758
NCU06444.5	chloride channel protein 3	train	NORMAL	Vogels Medium N	Dunlap07	Training set growth phenotypes obtained from PO1 Phenotype collection	http://neurosporacyc.broadinstitute.org/NC10/NEW-IMAGE?type=GENE&object=NCU06444
NCU03006.5	erg-4	train	NORMAL	Vogels Medium N	Dunlap07	Training set growth phenotypes obtained from PO1 Phenotype collection	http://neurosporacyc.broadinstitute.org/NC10/NEW-IMAGE?type=GENE&object=NCU03006
NCU06695.5	cox-6	train	NORMAL	Vogels Medium N	Dunlap07	Training set growth phenotypes obtained from PO1 Phenotype collection	http://neurosporacyc.broadinstitute.org/NC10/NEW-IMAGE?type=GENE&object=NCU06695
NCU02090.5	adenine phosphoribosyltransferase	train	NORMAL	Vogels Medium N	Dunlap07	Training set growth phenotypes obtained from PO1 Phenotype collection	http://neurosporacyc.broadinstitute.org/NC10/NEW-IMAGE?type=GENE&object=NCU02090
NCU00302.5	gsl-3	train	NORMAL	Vogels Medium N	Dunlap07	Training set growth phenotypes obtained from PO1 Phenotype collection	http://neurosporacyc.broadinstitute.org/NC10/NEW-IMAGE?type=GENE&object=NCU00302
NCU00316.5	peroxisomal adenine nucleotide transporter 1	train	NORMAL	Vogels Medium N	Dunlap07	Training set growth phenotypes obtained from PO1 Phenotype collection	http://neurosporacyc.broadinstitute.org/NC10/NEW-IMAGE?type=GENE&object=NCU00316
NCU00023.5	ferric reductase	train	NORMAL	Vogels Medium N	Dunlap07	Training set growth phenotypes obtained from PO1 Phenotype collection	http://neurosporacyc.broadinstitute.org/NC10/NEW-IMAGE?type=GENE&object=NCU00023
NCU02209.5	ods	train	NORMAL	Vogels Medium N	Dunlap07	Training set growth phenotypes obtained from PO1 Phenotype collection	http://neurosporacyc.broadinstitute.org/NC10/NEW-IMAGE?type=GENE&object=NCU02209
NCU03913.5	2-oxoisovalerate dehydrogenase beta subunit	train	NORMAL	Vogels Medium N	Dunlap07	Training set growth phenotypes obtained from PO1 Phenotype collection	http://neurosporacyc.broadinstitute.org/NC10/NEW-IMAGE?type=GENE&object=NCU03913
NCU00720.5	tca-17	train	NORMAL	Vogels Medium N	Dunlap07	Training set growth phenotypes obtained from PO1 Phenotype collection	http://neurosporacyc.broadinstitute.org/NC10/NEW-IMAGE?type=GENE&object=NCU00720
NCU02534.5	nuo49	train	NORMAL	Vogels Medium N	Dunlap07	Training set growth phenotypes obtained from PO1 Phenotype collection	http://neurosporacyc.broadinstitute.org/NC10/NEW-IMAGE?type=GENE&object=NCU02534
NCU02416.5	Phospholipid:diacylglycerol acyltransferase	train	NORMAL	Vogels Medium N	Dunlap07	Training set growth phenotypes obtained from PO1 Phenotype collection	http://neurosporacyc.broadinstitute.org/NC10/NEW-IMAGE?type=GENE&object=NCU02416
NCU06881.5	succinyl-CoA:3-ketoacid-coenzyme A transferase subunit A	train	NORMAL	Vogels Medium N	Dunlap07	Training set growth phenotypes obtained from PO1 Phenotype collection	http://neurosporacyc.broadinstitute.org/NC10/NEW-IMAGE?type=GENE&object=NCU06881
NCU02238.5	pantothenate transporter liz1	train	NORMAL	Vogels Medium N	Dunlap07	Training set growth phenotypes obtained from PO1 Phenotype collection	http://neurosporacyc.broadinstitute.org/NC10/NEW-IMAGE?type=GENE&object=NCU02238
NCU02626.5	kinesin	train	NORMAL	Vogels Medium N	Dunlap07	Training set growth phenotypes obtained from PO1 Phenotype collection	http://neurosporacyc.broadinstitute.org/NC10/NEW-IMAGE?type=GENE&object=NCU02626
NCU03415.5	cbs-3	train	NORMAL	Vogels Medium N	Dunlap07	Training set growth phenotypes obtained from PO1 Phenotype collection	http://neurosporacyc.broadinstitute.org/NC10/NEW-IMAGE?type=GENE&object=NCU03415
NCU03559.5	ubiquinol-cytochrome c reductase complex core protein 2 precursor	train	NORMAL	Vogels Medium N	Dunlap07	Training set growth phenotypes obtained from PO1 Phenotype collection	http://neurosporacyc.broadinstitute.org/NC10/NEW-IMAGE?type=GENE&object=NCU03559
NCU02296.5	aln-1	train	NORMAL	Vogels Medium N	Dunlap07	Training set growth phenotypes obtained from PO1 Phenotype collection	http://neurosporacyc.broadinstitute.org/NC10/NEW-IMAGE?type=GENE&object=NCU02296
NCU00575.5	glucokinase	train	NORMAL	Vogels Medium N	Dunlap07	Training set growth phenotypes obtained from PO1 Phenotype collection	http://neurosporacyc.broadinstitute.org/NC10/NEW-IMAGE?type=GENE&object=NCU00575
NCU07053.5	aldehyde dehydrogenase	train	NORMAL	Vogels Medium N	Dunlap07	Training set growth phenotypes obtained from PO1 Phenotype collection	http://neurosporacyc.broadinstitute.org/NC10/NEW-IMAGE?type=GENE&object=NCU07053
NCU04350.5	chs-7	train	NORMAL	Vogels Medium N	Dunlap07	Training set growth phenotypes obtained from PO1 Phenotype collection	http://neurosporacyc.broadinstitute.org/NC10/NEW-IMAGE?type=GENE&object=NCU04350
NCU00712.5	3-hydroxy-3-methylglutaryl-coenzyme A reductase	train	NORMAL	Vogels Medium N	Dunlap07	Training set growth phenotypes obtained from PO1 Phenotype collection	http://neurosporacyc.broadinstitute.org/NC10/NEW-IMAGE?type=GENE&object=NCU00712
NCU01824.5	UDP-galactopyranose mutase	train	NORMAL	Vogels Medium N	Dunlap07	Training set growth phenotypes obtained from PO1 Phenotype collection	http://neurosporacyc.broadinstitute.org/NC10/NEW-IMAGE?type=GENE&object=NCU01824
NCU00438.5	adenosine deaminase	train	NORMAL	Vogels Medium N	Dunlap07	Training set growth phenotypes obtained from PO1 Phenotype collection	http://neurosporacyc.broadinstitute.org/NC10/NEW-IMAGE?type=GENE&object=NCU00438
NCU00951.5	inorganic pyrophosphatase	train	NORMAL	Vogels Medium N	Dunlap07	Training set growth phenotypes obtained from PO1 Phenotype collection	http://neurosporacyc.broadinstitute.org/NC10/NEW-IMAGE?type=GENE&object=NCU00951
NCU05299.5	nuo29.9	train	NORMAL	Vogels Medium N	Dunlap07	Training set growth phenotypes obtained from PO1 Phenotype collection	http://neurosporacyc.broadinstitute.org/NC10/NEW-IMAGE?type=GENE&object=NCU05299
NCU08052.5	aquaporin	train	NORMAL	Vogels Medium N	Dunlap07	Training set growth phenotypes obtained from PO1 Phenotype collection	http://neurosporacyc.broadinstitute.org/NC10/NEW-IMAGE?type=GENE&object=NCU08052
NCU08791.5	cat-1	train	NORMAL	Vogels Medium N	Dunlap07	Training set growth phenotypes obtained from PO1 Phenotype collection	http://neurosporacyc.broadinstitute.org/NC10/NEW-IMAGE?type=GENE&object=NCU08791
NCU00985.5	hydrolase	train	NORMAL	Vogels Medium N	Dunlap07	Training set growth phenotypes obtained from PO1 Phenotype collection	http://neurosporacyc.broadinstitute.org/NC10/NEW-IMAGE?type=GENE&object=NCU00985
NCU01754.5	adh-1	train	NORMAL	Vogels Medium N	Dunlap07	Training set growth phenotypes obtained from PO1 Phenotype collection	http://neurosporacyc.broadinstitute.org/NC10/NEW-IMAGE?type=GENE&object=NCU01754
NCU03850.5	ureidoglycolate hydrolase	train	NORMAL	Vogels Medium N	Dunlap07	Training set growth phenotypes obtained from PO1 Phenotype collection	http://neurosporacyc.broadinstitute.org/NC10/NEW-IMAGE?type=GENE&object=NCU03850
NCU00187.5	mig-11	train	NORMAL	Vogels Medium N	Dunlap07	Training set growth phenotypes obtained from PO1 Phenotype collection	http://neurosporacyc.broadinstitute.org/NC10/NEW-IMAGE?type=GENE&object=NCU00187
NCU00168.5	1-acylglycerol-3-phosphate O-acyltransferase	train	NORMAL	Vogels Medium N	Dunlap07	Training set growth phenotypes obtained from PO1 Phenotype collection	http://neurosporacyc.broadinstitute.org/NC10/NEW-IMAGE?type=GENE&object=NCU00168
NCU01868.5	MFS maltose permease MalP	train	NORMAL	Vogels Medium N	Dunlap07	Training set growth phenotypes obtained from PO1 Phenotype collection	http://neurosporacyc.broadinstitute.org/NC10/NEW-IMAGE?type=GENE&object=NCU01868
NCU00792.5	branched-chain-amino-acid aminotransferase	train	NORMAL	Vogels Medium N	Dunlap07	Training set growth phenotypes obtained from PO1 Phenotype collection	http://neurosporacyc.broadinstitute.org/NC10/NEW-IMAGE?type=GENE&object=NCU00792
NCU02195.5	high affinity methionine permease	train	NORMAL	Vogels Medium N	Dunlap07	Training set growth phenotypes obtained from PO1 Phenotype collection	http://neurosporacyc.broadinstitute.org/NC10/NEW-IMAGE?type=GENE&object=NCU02195
NCU04044.5	nuo51	train	NORMAL	Vogels Medium N	Dunlap07	Training set growth phenotypes obtained from PO1 Phenotype collection	http://neurosporacyc.broadinstitute.org/NC10/NEW-IMAGE?type=GENE&object=NCU04044
NCU02291.5	glutaryl-CoA dehydrogenase	train	NORMAL	Vogels Medium N	Dunlap07	Training set growth phenotypes obtained from PO1 Phenotype collection	http://neurosporacyc.broadinstitute.org/NC10/NEW-IMAGE?type=GENE&object=NCU02291
NCU00484.5	nuo18.4	train	NORMAL	Vogels Medium N	Dunlap07	Training set growth phenotypes obtained from PO1 Phenotype collection	http://neurosporacyc.broadinstitute.org/NC10/NEW-IMAGE?type=GENE&object=NCU00484
NCU01066.5	lao	train	NORMAL	Vogels Medium N	Dunlap07	Training set growth phenotypes obtained from PO1 Phenotype collection	http://neurosporacyc.broadinstitute.org/NC10/NEW-IMAGE?type=GENE&object=NCU01066
NCU06417.5	uc-6	train	NORMAL	Vogels Medium N	Dunlap07	Training set growth phenotypes obtained from PO1 Phenotype collection	http://neurosporacyc.broadinstitute.org/NC10/NEW-IMAGE?type=GENE&object=NCU06417
NCU09715.5	alpha,alpha-trehalose-phosphate synthase	train	NORMAL	Vogels Medium N	Dunlap07	Training set growth phenotypes obtained from PO1 Phenotype collection	http://neurosporacyc.broadinstitute.org/NC10/NEW-IMAGE?type=GENE&object=NCU09715
NCU00233.5	glycoside hydrolase	train	NORMAL	Vogels Medium N	Dunlap07	Training set growth phenotypes obtained from PO1 Phenotype collection	http://neurosporacyc.broadinstitute.org/NC10/NEW-IMAGE?type=GENE&object=NCU00233
NCU00644.5	ATP synthase subunit G	train	NORMAL	Vogels Medium N	Dunlap07	Training set growth phenotypes obtained from PO1 Phenotype collection	http://neurosporacyc.broadinstitute.org/NC10/NEW-IMAGE?type=GENE&object=NCU00644
NCU04452.5	mig-3	train	NORMAL	Vogels Medium N	Dunlap07	Training set growth phenotypes obtained from PO1 Phenotype collection	http://neurosporacyc.broadinstitute.org/NC10/NEW-IMAGE?type=GENE&object=NCU04452
NCU08927.5	dihydroceramide delta(4)-desaturase	train	NORMAL	Vogels Medium N	Dunlap07	Training set growth phenotypes obtained from PO1 Phenotype collection	http://neurosporacyc.broadinstitute.org/NC10/NEW-IMAGE?type=GENE&object=NCU08927
NCU02895.5	MutT/nudix family protein	train	NORMAL	Vogels Medium N	Dunlap07	Training set growth phenotypes obtained from PO1 Phenotype collection	http://neurosporacyc.broadinstitute.org/NC10/NEW-IMAGE?type=GENE&object=NCU02895
NCU01333.5	erg-2	train	NORMAL	Vogels Medium N	Dunlap07	Training set growth phenotypes obtained from PO1 Phenotype collection	http://neurosporacyc.broadinstitute.org/NC10/NEW-IMAGE?type=GENE&object=NCU01333
NCU01140.5	NAD(P) transhydrogenase	train	NORMAL	Vogels Medium N	Dunlap07	Training set growth phenotypes obtained from PO1 Phenotype collection	http://neurosporacyc.broadinstitute.org/NC10/NEW-IMAGE?type=GENE&object=NCU01140
NCU06625.5	cysteine dioxygenase	train	NORMAL	Vogels Medium N	Dunlap07	Training set growth phenotypes obtained from PO1 Phenotype collection	http://neurosporacyc.broadinstitute.org/NC10/NEW-IMAGE?type=GENE&object=NCU06625
NCU00414.5	adenosine kinase	train	NORMAL	Vogels Medium N	Dunlap07	Training set growth phenotypes obtained from PO1 Phenotype collection	http://neurosporacyc.broadinstitute.org/NC10/NEW-IMAGE?type=GENE&object=NCU00414
NCU00446.5	acetoacetyl-CoA synthase	train	NORMAL	Vogels Medium N	Dunlap07	Training set growth phenotypes obtained from PO1 Phenotype collection	http://neurosporacyc.broadinstitute.org/NC10/NEW-IMAGE?type=GENE&object=NCU00446
NCU02480.5	short-chain dehydrogenase/reductase	train	NORMAL	Vogels Medium N	Dunlap07	Training set growth phenotypes obtained from PO1 Phenotype collection	http://neurosporacyc.broadinstitute.org/NC10/NEW-IMAGE?type=GENE&object=NCU02480
NCU00782.5	pantothenate transporter liz1	train	NORMAL	Vogels Medium N	Dunlap07	Training set growth phenotypes obtained from PO1 Phenotype collection	http://neurosporacyc.broadinstitute.org/NC10/NEW-IMAGE?type=GENE&object=NCU00782
NCU00648.5	choline transporter	train	NORMAL	Vogels Medium N	Dunlap07	Training set growth phenotypes obtained from PO1 Phenotype collection	http://neurosporacyc.broadinstitute.org/NC10/NEW-IMAGE?type=GENE&object=NCU00648
NCU03713.5	guanosine-diphosphatase	train	NORMAL	Vogels Medium N	Dunlap07	Training set growth phenotypes obtained from PO1 Phenotype collection	http://neurosporacyc.broadinstitute.org/NC10/NEW-IMAGE?type=GENE&object=NCU03713
NCU00649.5	nic-6	train	NORMAL	Vogels Medium N	Dunlap07	Training set growth phenotypes obtained from PO1 Phenotype collection	http://neurosporacyc.broadinstitute.org/NC10/NEW-IMAGE?type=GENE&object=NCU00649
NCU06624.5	CLC voltage-gated chloride channel protein	train	NORMAL	Vogels Medium N	Dunlap07	Training set growth phenotypes obtained from PO1 Phenotype collection	http://neurosporacyc.broadinstitute.org/NC10/NEW-IMAGE?type=GENE&object=NCU06624
NCU02475.5	glycine dehydrogenase	train	NORMAL	Vogels Medium N	Dunlap07	Training set growth phenotypes obtained from PO1 Phenotype collection	http://neurosporacyc.broadinstitute.org/NC10/NEW-IMAGE?type=GENE&object=NCU02475
NCU02193.5	cfp	train	NORMAL	Vogels Medium N	Dunlap07	Training set growth phenotypes obtained from PO1 Phenotype collection	http://neurosporacyc.broadinstitute.org/NC10/NEW-IMAGE?type=GENE&object=NCU02193
NCU02127.5	methylcrotonoyl-CoA carboxylase subunit beta	train	NORMAL	Vogels Medium N	Dunlap07	Training set growth phenotypes obtained from PO1 Phenotype collection	http://neurosporacyc.broadinstitute.org/NC10/NEW-IMAGE?type=GENE&object=NCU02127
NCU02333.5	aga-1	train	NORMAL	Vogels Medium N	Dunlap07	Training set growth phenotypes obtained from PO1 Phenotype collection	http://neurosporacyc.broadinstitute.org/NC10/NEW-IMAGE?type=GENE&object=NCU02333
NCU00680.5	2-methylcitrate dehydratase	train	NORMAL	Vogels Medium N	Dunlap07	Training set growth phenotypes obtained from PO1 Phenotype collection	http://neurosporacyc.broadinstitute.org/NC10/NEW-IMAGE?type=GENE&object=NCU00680
NCU02226.5	methylthioribose-1-phosphate isomerase	train	NORMAL	Vogels Medium N	Dunlap07	Training set growth phenotypes obtained from PO1 Phenotype collection	http://neurosporacyc.broadinstitute.org/NC10/NEW-IMAGE?type=GENE&object=NCU02226
NCU05802.5	ATP-dependent RNA helicase A	train	NORMAL	Vogels Medium N	Dunlap07	Training set growth phenotypes obtained from PO1 Phenotype collection	http://neurosporacyc.broadinstitute.org/NC10/NEW-IMAGE?type=GENE&object=NCU05802
NCU00643.5	L-arabinitol 4-dehydrogenase	train	NORMAL	Vogels Medium N	Dunlap07	Training set growth phenotypes obtained from PO1 Phenotype collection	http://neurosporacyc.broadinstitute.org/NC10/NEW-IMAGE?type=GENE&object=NCU00643
NCU02922.5	short-chain dehydrogenase/reductase	train	NORMAL	Vogels Medium N	Dunlap07	Training set growth phenotypes obtained from PO1 Phenotype collection	http://neurosporacyc.broadinstitute.org/NC10/NEW-IMAGE?type=GENE&object=NCU02922
NCU03861.5	glutaminase A	train	NORMAL	Vogels Medium N	Dunlap07	Training set growth phenotypes obtained from PO1 Phenotype collection	http://neurosporacyc.broadinstitute.org/NC10/NEW-IMAGE?type=GENE&object=NCU03861
NCU04433.5	cys-14	train	NORMAL	Vogels Medium N	Dunlap07	Training set growth phenotypes obtained from PO1 Phenotype collection	http://neurosporacyc.broadinstitute.org/NC10/NEW-IMAGE?type=GENE&object=NCU04433
NCU00548.5	MutT/nudix family protein	train	NORMAL	Vogels Medium N	Dunlap07	Training set growth phenotypes obtained from PO1 Phenotype collection	http://neurosporacyc.broadinstitute.org/NC10/NEW-IMAGE?type=GENE&object=NCU00548
NCU02712.5	acetate kinase	train	NORMAL	Vogels Medium N	Dunlap07	Training set growth phenotypes obtained from PO1 Phenotype collection	http://neurosporacyc.broadinstitute.org/NC10/NEW-IMAGE?type=GENE&object=NCU02712
NCU05298.5	nit-3	train	NONE	Vogels - ammonium	Davis00	Unable to use nitrate as nitrogen source [<a href="http://books.google.com/books?id=mLOMPN20MD8C&lpg=PP1&dq=neurospora%3A%20contributions%20of%20a%20model%20organism&pg=PP1#v=onepage&q&f=false">Davis, 2000</a>] p. 113	http://neurosporacyc.broadinstitute.org/NC10/NEW-IMAGE?type=GENE&object=NCU05298
NCU06558.5	oxD	train	NONE	Vogels + D-methionine - sulfate	OHNISHI62	Unable to use D-methionine as a sole sulfur source. Table 3, row 2, of Ohnishi et al. [<a href="http://www.ncbi.nlm.nih.gov/pubmed/14481396">OHNISHI et al., 1962</a>]	http://neurosporacyc.broadinstitute.org/NC10/NEW-IMAGE?type=GENE&object=NCU06558
NCU09873.5	acu-6	train	NONE	Vogels + acetate - sucrose	Davis00	[<a href="http://books.google.com/books?id=mLOMPN20MD8C&lpg=PP1&dq=neurospora%3A%20contributions%20of%20a%20model%20organism&pg=PP1#v=onepage&q&f=false">Davis, 2000</a>] p. 90. Unable to use acetate as a carbon source	http://neurosporacyc.broadinstitute.org/NC10/NEW-IMAGE?type=GENE&object=NCU09873
NCU04230.5	acu-3	train	NONE	Vogels + acetate - sucrose	Davis00	[<a href="http://books.google.com/books?id=mLOMPN20MD8C&lpg=PP1&dq=neurospora%3A%20contributions%20of%20a%20model%20organism&pg=PP1#v=onepage&q&f=false">Davis, 2000</a>] p. 90. Unable to use acetate as a carbon source	http://neurosporacyc.broadinstitute.org/NC10/NEW-IMAGE?type=GENE&object=NCU04230
NCU06836.5	acu-5	train	NONE	Vogels + acetate - sucrose	Davis00	[<a href="http://books.google.com/books?id=mLOMPN20MD8C&lpg=PP1&dq=neurospora%3A%20contributions%20of%20a%20model%20organism&pg=PP1#v=onepage&q&f=false">Davis, 2000</a>] p. 90. Unable to use acetate as a carbon source	http://neurosporacyc.broadinstitute.org/NC10/NEW-IMAGE?type=GENE&object=NCU06836
NCU00468.5	tyr-1	train	NONE	Vogels Medium N	Baker68	[<a href="http://www.ncbi.nlm.nih.gov/pubmed/17248403">Baker, 1968</a>]. Requires Tyrosine	http://neurosporacyc.broadinstitute.org/NC10/NEW-IMAGE?type=GENE&object=NCU00468
NCU06722.5	trp-5	train	NONE	Vogels Medium N	Nazario71	[<a href="http://www.ncbi.nlm.nih.gov/pubmed/5540999">Nazario et al., 1971</a>]. supplements are to make up for partial KOs. Full KOs can't be rescued.	http://neurosporacyc.broadinstitute.org/NC10/NEW-IMAGE?type=GENE&object=NCU06722
NCU08409.5	trp-3	train	NONE	Vogels Medium N	Ahmad60	table 2 from [<a href="http://bioinformatics.leeds.ac.uk/~gen6ar/newgenelist/database.cgi?ref=11">Ahmad, 1960</a>]. Ahmad, M., and D. G. Catcheside	http://neurosporacyc.broadinstitute.org/NC10/NEW-IMAGE?type=GENE&object=NCU10283
NCU00200.5	trp-1	train	NONE	Vogels Medium N	Ahmad60	[<a href="http://bioinformatics.leeds.ac.uk/~gen6ar/newgenelist/database.cgi?ref=11">Ahmad, 1960</a>]. Ahmad, M., and D. G. Catcheside	http://neurosporacyc.broadinstitute.org/NC10/NEW-IMAGE?type=GENE&object=NCU00200
NCU03425.5	thr-2	train	NONE	Vogels Medium N	FLAVIN60	called a thr auxotroph in [<a href="http://www.ncbi.nlm.nih.gov/pubmed/13823379">FLAVIN & SLAUGHTER, 1960</a>]. Flavin, M., and C. Slaughter (1960); does not possess any enzyme (4.2.3.1) activity	http://neurosporacyc.broadinstitute.org/NC10/NEW-IMAGE?type=GENE&object=NCU03425
NCU07849.5	thi-4	train	NONE	Vogels Medium N	Akiyama96	Akiyama & Nakashima (pubmed: 8662211) say Two mutants, designated thi-2 and thi-4, require thiamine itself for growth but this mutant is very leaky according to Radford comments.	http://neurosporacyc.broadinstitute.org/NC10/NEW-IMAGE?type=GENE&object=NCU07849
NCU08313.5	rib-2	train	NONE	Vogels Medium N	Garnjobst56	figs 1 & 2 from [<a href="http://bioinformatics.leeds.ac.uk/~gen6ar/newgenelist/database.cgi?ref=718">Garnjobst, 1956</a>]. Garnjobst, L., and E. L. Tatum	http://neurosporacyc.broadinstitute.org/NC10/NEW-IMAGE?type=GENE&object=NCU08313
NCU07725.5	pt	train	NONE	Vogels Medium N	Colburn65	[<a href="http://bioinformatics.leeds.ac.uk/~gen6ar/newgenelist/database.cgi?ref=396">Colburn, 1965</a>]. Colburn, R. W., and E. L. Tatum (1965)	http://neurosporacyc.broadinstitute.org/NC10/NEW-IMAGE?type=GENE&object=NCU07725
NCU05752.5	nt	train	NONE	Vogels Medium N	Gaertner81	non-leaky & did not grow on Vogel's minimal according to http://www.fgsc.net/fgn/nn28/28gaertner.pdf	http://neurosporacyc.broadinstitute.org/NC10/NEW-IMAGE?type=GENE&object=NCU05752
NCU06924.5	nic-3	train	NONE	Vogels Medium N	Yanofsky50	table 1 from [<a href="http://www.ncbi.nlm.nih.gov/pubmed/16588968">Yanofsky & Bonner, 1950</a>]. Yanofsky, C., and D. M. Bonner	http://neurosporacyc.broadinstitute.org/NC10/NEW-IMAGE?type=GENE&object=NCU06924
NCU03282.5	nic-2	train	NONE	Vogels Medium N	Yanofsky50	table 1 from [<a href="http://www.ncbi.nlm.nih.gov/pubmed/16588968">Yanofsky & Bonner, 1950</a>]. Yanofsky, C., and D. M. Bonner	http://neurosporacyc.broadinstitute.org/NC10/NEW-IMAGE?type=GENE&object=NCU03282
NCU02998.5	nic-1	train	NONE	Vogels Medium N	Bonner49	table 1 from [<a href="http://bioinformatics.leeds.ac.uk/~gen6ar/newgenelist/database.cgi?ref=195">Bonner, 1949</a>]. Bonner, D. M., and C. Yanofsky	http://neurosporacyc.broadinstitute.org/NC10/NEW-IMAGE?type=GENE&object=NCU02998
NCU06512.5	met-8	train	NONE	Vogels Medium N	Murray60	table 1 from [<a href="http://bioinformatics.leeds.ac.uk/~gen6ar/newgenelist/database.cgi?ref=1411">Murray, 1960</a>]. Murray, N. E.	http://neurosporacyc.broadinstitute.org/NC10/NEW-IMAGE?type=GENE&object=NCU06512
NCU02430.5	met-7	train	NONE	Vogels Medium N	Murray60	table 1 from [<a href="http://bioinformatics.leeds.ac.uk/~gen6ar/newgenelist/database.cgi?ref=1411">Murray, 1960</a>]. Murray, N. E.	http://neurosporacyc.broadinstitute.org/NC10/NEW-IMAGE?type=GENE&object=NCU02430
NCU00892.5	met-6	train	NONE	Vogels Medium N	Murray60	table 1 from [<a href="http://bioinformatics.leeds.ac.uk/~gen6ar/newgenelist/database.cgi?ref=1411">Murray, 1960</a>]. Murray, N. E.	http://neurosporacyc.broadinstitute.org/NC10/NEW-IMAGE?type=GENE&object=NCU00892
NCU07001.5	met-5	train	NONE	Vogels Medium N	Murray60	table 1 from [<a href="http://bioinformatics.leeds.ac.uk/~gen6ar/newgenelist/database.cgi?ref=1411">Murray, 1960</a>]. Murray, N. E.	http://neurosporacyc.broadinstitute.org/NC10/NEW-IMAGE?type=GENE&object=NCU07001
NCU07987.5	met-2	train	NONE	Vogels Medium N	Horowitz47	table 1 from [<a href="http://bioinformatics.leeds.ac.uk/~gen6ar/newgenelist/database.cgi?ref=893">Horowitz, 1947</a>]. Horowitz, N. H. (1947).	http://neurosporacyc.broadinstitute.org/NC10/NEW-IMAGE?type=GENE&object=NCU07987
NCU05526.5	lys-5	train	NONE	Vogels Medium N	TRUPIN65	author statement of auxotrophy in 887. Hogg, R. W., and H. P. Broquist. Table 1. Trupin 1965 [<a href="http://www.ncbi.nlm.nih.gov/pubmed/14304863">TRUPIN & BROQUIST, 1965</a>]	http://neurosporacyc.broadinstitute.org/NC10/NEW-IMAGE?type=GENE&object=NCU05526
NCU03118.5	lys-4	train	NONE	Vogels Medium N	TRUPIN65	Table 1. Trupin 1965 [<a href="http://www.ncbi.nlm.nih.gov/pubmed/14304863">TRUPIN & BROQUIST, 1965</a>]	http://neurosporacyc.broadinstitute.org/NC10/NEW-IMAGE?type=GENE&object=NCU03118
NCU03010.5	lys-3	train	NONE	Vogels Medium N	TRUPIN65	figure 1 from Doermann AH (1945) J. Biol. Chem. 160:95-103 (no pmid). Table 1. Trupin 1965 [<a href="http://www.ncbi.nlm.nih.gov/pubmed/14304863">TRUPIN & BROQUIST, 1965</a>]	http://neurosporacyc.broadinstitute.org/NC10/NEW-IMAGE?type=GENE&object=NCU03010
NCU03748.5	lys-2	train	NONE	Vogels Medium N	TRUPIN65	table 1 from [<a href="http://www.ncbi.nlm.nih.gov/pubmed/14304863">TRUPIN & BROQUIST, 1965</a>]. Trupin, J. S., and H. P. Broquist	http://neurosporacyc.broadinstitute.org/NC10/NEW-IMAGE?type=GENE&object=NCU03748
NCU06232.5	leu-1	train	NONE	Vogels Medium N	Regnery44	from [<a href="http://bioinformatics.leeds.ac.uk/~gen6ar/newgenelist/database.cgi?ref=1705">Regnery, 1944</a>]. Regnery, D. C. (1944). From crosses of leucineless (Strain 33757) and wild type strains, spores from 131 asci were isolated, their positions in the asci recorded, and cultures established from them on a medium containing leucine. Transfers of conidia were then made to a medium in which …	http://neurosporacyc.broadinstitute.org/NC10/NEW-IMAGE?type=GENE&object=NCU06232
NCU00554.5	hom-1	train	NONE	Vogels Medium N	TEAS48	tables 1 & 3 from [<a href="http://www.ncbi.nlm.nih.gov/pubmed/18901184">TEAS et al., 1948</a>]. Teas, H. J., N. H. Horowitz, and M. Fling	http://neurosporacyc.broadinstitute.org/NC10/NEW-IMAGE?type=GENE&object=NCU00554
NCU06724.5	gln-1	train	NONE	Vogels Medium N	Davila83	table 1 from [<a href="http://www.ncbi.nlm.nih.gov/pubmed/6139363">Davila et al., 1983</a>]. DÃ¡vila, G., F. Sanchez, R. Palacios, and J. Mora (1978).	http://neurosporacyc.broadinstitute.org/NC10/NEW-IMAGE?type=GENE&object=NCU06724
NCU08352.5	cys-9	train	NONE	Vogels Medium N	LEINWEBER65,Murray65	Murray, N. E. ([<a href="http://www.ncbi.nlm.nih.gov/pubmed/5826323">Murray, 1965</a>]), Leinweber [<a href="http://www.ncbi.nlm.nih.gov/pubmed/14275135">LEINWEBER & MONTY, 1965</a>] mutant UT-156 was identified as cys-9 by Murray	http://neurosporacyc.broadinstitute.org/NC10/NEW-IMAGE?type=GENE&object=NCU08352
NCU02005.5	cys-5	train	NONE	Vogels Medium N	Murray65	table 1 from [<a href="http://www.ncbi.nlm.nih.gov/pubmed/5826323">Murray, 1965</a>]. Murray, N. E.. Murray, N. E. ([<a href="http://www.ncbi.nlm.nih.gov/pubmed/5826323">Murray, 1965</a>]), Phinney, 1948. Mutant 35001 is named cys-5 by Murray. Phinney states These strains cannot grow on a minimal medium containing sulfate as the sole source of sulfur.	http://neurosporacyc.broadinstitute.org/NC10/NEW-IMAGE?type=GENE&object=NCU02005
NCU05238.5	cys-4	train	NONE	Vogels Medium N	Murray65	table 1 from [<a href="http://www.ncbi.nlm.nih.gov/pubmed/5826323">Murray, 1965</a>]. Murray, N. E.	http://neurosporacyc.broadinstitute.org/NC10/NEW-IMAGE?type=GENE&object=NCU05238
NCU01985.5	cys-11	train	NONE	Vogels Medium N	Murray65	table 1 from [<a href="http://www.ncbi.nlm.nih.gov/pubmed/5826323">Murray, 1965</a>]. Murray, N. E.	http://neurosporacyc.broadinstitute.org/NC10/NEW-IMAGE?type=GENE&object=NCU01985
NCU04303.5	asn-1	train	NONE	Vogels Medium N	Tanenbaum54	figure 1 from [<a href="http://bioinformatics.leeds.ac.uk/~gen6ar/newgenelist/database.cgi?ref=2048">Tanenbaum, 1954</a>]. Tanenbaum, S. W., L. Garnjobst, and E. Tatum. phenotype: 'Grows adaptively on minimal medium'. don't trust radford phenotype	http://neurosporacyc.broadinstitute.org/NC10/NEW-IMAGE?type=GENE&object=NCU11671
NCU00567.5	arg-6	train	NONE	Vogels Medium N	Davis79	table 2 from [<a href="http://www.ncbi.nlm.nih.gov/pubmed/161750">Davis, 1979</a>]. Davis, R. H. (1979).	http://neurosporacyc.broadinstitute.org/NC10/NEW-IMAGE?type=GENE&object=NCU00567
NCU05410.5	arg-5	train	NONE	Vogels Medium N	Davis79	table 2 from [<a href="http://www.ncbi.nlm.nih.gov/pubmed/161750">Davis, 1979</a>]. Davis, R. H. (1979).	http://neurosporacyc.broadinstitute.org/NC10/NEW-IMAGE?type=GENE&object=NCU05410
NCU07682.5	arg-14	train	NONE	Vogels Medium N	Davis79	table 2 from [<a href="http://www.ncbi.nlm.nih.gov/pubmed/161750">Davis, 1979</a>]. Davis, R. H. (1979).	http://neurosporacyc.broadinstitute.org/NC10/NEW-IMAGE?type=GENE&object=NCU07682
NCU01667.5	arg-12	train	NONE	Vogels Medium N	WOODWARD64	table 2 from [<a href="http://www.ncbi.nlm.nih.gov/pubmed/14158616">WOODWARD & SCHWARZ, 1964</a>]. Woodward, V. W., and P. Schwarz	http://neurosporacyc.broadinstitute.org/NC10/NEW-IMAGE?type=GENE&object=NCU01667
NCU08162.5	arg-10	train	NONE	Vogels Medium N	NEWMEYER57	[<a href="http://www.ncbi.nlm.nih.gov/pubmed/13416522">NEWMEYER, 1957</a>]. Newmeyer, D. (1957).	http://neurosporacyc.broadinstitute.org/NC10/NEW-IMAGE?type=GENE&object=NCU08162
NCU02639.5	arg-1	train	NONE	Vogels Medium N	Srb44	[<a href="http://bioinformatics.leeds.ac.uk/~gen6ar/newgenelist/database.cgi?ref=1968">Srb, 1944</a>]. Srb, A. M., and N. H. Horowitz. â€œStrain 36703 grows only in the presence of arginine.â€	http://neurosporacyc.broadinstitute.org/NC10/NEW-IMAGE?type=GENE&object=NCU02639
NCU09789.5	ad-8	train	NONE	Vogels Medium N	Giles57	[<a href="http://www.ncbi.nlm.nih.gov/pubmed/16578469">Giles et al., 1957</a>]. Giles, N. H., C. W. H. Partridge, and N. J. Nelson	http://neurosporacyc.broadinstitute.org/NC10/NEW-IMAGE?type=GENE&object=NCU09789
NCU06187.5	ad-4	train	NONE	Vogels Medium N	Giles57	[<a href="http://www.ncbi.nlm.nih.gov/pubmed/16578469">Giles et al., 1957</a>]. Giles, N. H., C. W. H. Partridge, and N. J. Nelson	http://neurosporacyc.broadinstitute.org/NC10/NEW-IMAGE?type=GENE&object=NCU06187
NCU06075.5	ace-8	train	NONE	Vogels Medium N	Kuwana79	From Kuwana and Kubota, 1983 ([<a href="http://www.journalarchive.jst.go.jp/jnlpdf.php?cdjournal=ggs1921&cdvol=54&noissue=4&startpage=235&lang=en&from=jnltoc">Kuwana & Okumura, 1979</a>])	http://neurosporacyc.broadinstitute.org/NC10/NEW-IMAGE?type=GENE&object=NCU06075
NCU09111.5	ace-7	train	NONE	Vogels Medium N	Nishikawa85,Kuwana79	figure 1a in Nikishawa, K., and H. Kuwana ([<a href="https://www.jstage.jst.go.jp/article/ggs1921/60/1/60_1_39/_pdf">Nishikawa & Kuwana, 1985</a>])	http://neurosporacyc.broadinstitute.org/NC10/NEW-IMAGE?type=GENE&object=NCU09111
NCU07659.5	ace-2	train	NONE	Vogels Medium N	Kuwana83	tables 1 & 2 from Kuwana, H., and R. Okumura ([<a href="https://www.jstage.jst.go.jp/article/ggs1921/58/6/58_6_579/_pdf">Kuwana & Kubota, 1983</a>])	http://neurosporacyc.broadinstitute.org/NC10/NEW-IMAGE?type=GENE&object=NCU07659
NCU03004.5	ace-3	train	NONE	Vogels Medium N	Kuwana83	tables 1 & 2 from Kuwana, H., and R. Okumura ([<a href="https://www.jstage.jst.go.jp/article/ggs1921/58/6/58_6_579/_pdf">Kuwana & Kubota, 1983</a>])	http://neurosporacyc.broadinstitute.org/NC10/NEW-IMAGE?type=GENE&object=NCU03004
NCU06482.5	ace-4	train	NONE	Vogels Medium N	Kuwana83	tables 1 & 2 from Kuwana, H., and R. Okumura ([<a href="https://www.jstage.jst.go.jp/article/ggs1921/58/6/58_6_579/_pdf">Kuwana & Kubota, 1983</a>])	http://neurosporacyc.broadinstitute.org/NC10/NEW-IMAGE?type=GENE&object=NCU06482

## Sheet: Essentiality test set
Locus	Gene	TrainOrTest?	Growth?	Media	citations	comments	URL
NCU01512.5	phenylalanyl-tRNA synthetase	test	NORMAL	Vogels Medium N	Colot06	Test set growth phenotypes obtained from PO1 homokaryon collection	http://neurosporacyc.broadinstitute.org/NC10/NEW-IMAGE?type=GENE&object=NCU01512
NCU02979.5	AMP deaminase	test	NORMAL	Vogels Medium N	Colot06	Test set growth phenotypes obtained from PO1 homokaryon collection	http://neurosporacyc.broadinstitute.org/NC10/NEW-IMAGE?type=GENE&object=NCU02979
NCU04474.5	sulfite oxidase	test	NORMAL	Vogels Medium N	Colot06	Test set growth phenotypes obtained from PO1 homokaryon collection	http://neurosporacyc.broadinstitute.org/NC10/NEW-IMAGE?type=GENE&object=NCU04474
NCU06228.5	conserved hypothetical protein	test	NORMAL	Vogels Medium N	Colot06	Test set growth phenotypes obtained from PO1 homokaryon collection	http://neurosporacyc.broadinstitute.org/NC10/NEW-IMAGE?type=GENE&object=NCU06228
NCU07931.5	glyoxylate reductase	test	NORMAL	Vogels Medium N	Colot06	Test set growth phenotypes obtained from PO1 homokaryon collection	http://neurosporacyc.broadinstitute.org/NC10/NEW-IMAGE?type=GENE&object=NCU07931
NCU04280.5	aconitate hydratase	test	NORMAL	Vogels Medium N	Colot06	Test set growth phenotypes obtained from PO1 homokaryon collection	http://neurosporacyc.broadinstitute.org/NC10/NEW-IMAGE?type=GENE&object=NCU04280
NCU09885.5	acyl-CoA dehydrogenase	test	NORMAL	Vogels Medium N	Colot06	Test set growth phenotypes obtained from PO1 homokaryon collection	http://neurosporacyc.broadinstitute.org/NC10/NEW-IMAGE?type=GENE&object=NCU09885
NCU01371.5	UPF0660 protein	test	NORMAL	Vogels Medium N	Colot06	Test set growth phenotypes obtained from PO1 homokaryon collection	http://neurosporacyc.broadinstitute.org/NC10/NEW-IMAGE?type=GENE&object=NCU01371
NCU00463.5	kyn-2	test	NORMAL	Vogels Medium N	Colot06	Test set growth phenotypes obtained from PO1 homokaryon collection	http://neurosporacyc.broadinstitute.org/NC10/NEW-IMAGE?type=GENE&object=NCU00463
NCU02110.5	nox-1	test	NORMAL	Vogels Medium N	Colot06	Test set growth phenotypes obtained from PO1 homokaryon collection	http://neurosporacyc.broadinstitute.org/NC10/NEW-IMAGE?type=GENE&object=NCU02110
NCU09553.5	3-hydroxybutyryl CoA dehydrogenase	test	NORMAL	Vogels Medium N	Colot06	Test set growth phenotypes obtained from PO1 homokaryon collection	http://neurosporacyc.broadinstitute.org/NC10/NEW-IMAGE?type=GENE&object=NCU09553
NCU08755.5	gh3-3	test	NORMAL	Vogels Medium N	Colot06	Test set growth phenotypes obtained from PO1 homokaryon collection	http://neurosporacyc.broadinstitute.org/NC10/NEW-IMAGE?type=GENE&object=NCU08755
NCU09911.5	formyltetrahydrofolate deformylase	test	NORMAL	Vogels Medium N	Colot06	Test set growth phenotypes obtained from PO1 homokaryon collection	http://neurosporacyc.broadinstitute.org/NC10/NEW-IMAGE?type=GENE&object=NCU09911
NCU00436.5	GTPase FZO1	test	NORMAL	Vogels Medium N	Colot06	Test set growth phenotypes obtained from PO1 homokaryon collection	http://neurosporacyc.broadinstitute.org/NC10/NEW-IMAGE?type=GENE&object=NCU00436
NCU08998.5	4-aminobutyrate aminotransferase	test	NORMAL	Vogels Medium N	Colot06	Test set growth phenotypes obtained from PO1 homokaryon collection	http://neurosporacyc.broadinstitute.org/NC10/NEW-IMAGE?type=GENE&object=NCU08998
NCU01103.5	carbonic anhydrase	test	NORMAL	Vogels Medium N	Colot06	Test set growth phenotypes obtained from PO1 homokaryon collection	http://neurosporacyc.broadinstitute.org/NC10/NEW-IMAGE?type=GENE&object=NCU01103
NCU08743.5	inorganic phosphate transporter	test	NORMAL	Vogels Medium N	Colot06	Test set growth phenotypes obtained from PO1 homokaryon collection	http://neurosporacyc.broadinstitute.org/NC10/NEW-IMAGE?type=GENE&object=NCU08743
NCU01905.5	sorbitol dehydrogenase	test	NORMAL	Vogels Medium N	Colot06	Test set growth phenotypes obtained from PO1 homokaryon collection	http://neurosporacyc.broadinstitute.org/NC10/NEW-IMAGE?type=GENE&object=NCU01905
NCU09324.5	chs-4	test	NORMAL	Vogels Medium N	Colot06	Test set growth phenotypes obtained from PO1 homokaryon collection	http://neurosporacyc.broadinstitute.org/NC10/NEW-IMAGE?type=GENE&object=NCU09324
NCU00801.5	cdt-1	test	NORMAL	Vogels Medium N	Colot06	Test set growth phenotypes obtained from PO1 homokaryon collection	http://neurosporacyc.broadinstitute.org/NC10/NEW-IMAGE?type=GENE&object=NCU00801
NCU02665.5	diacylglycerol O-acyltransferase	test	NORMAL	Vogels Medium N	Colot06	Test set growth phenotypes obtained from PO1 homokaryon collection	http://neurosporacyc.broadinstitute.org/NC10/NEW-IMAGE?type=GENE&object=NCU02665
NCU07620.5	MFS pantothenate transporter	test	NORMAL	Vogels Medium N	Colot06	Test set growth phenotypes obtained from PO1 homokaryon collection	http://neurosporacyc.broadinstitute.org/NC10/NEW-IMAGE?type=GENE&object=NCU07620
NCU07170.5	hydantoin racemase	test	NORMAL	Vogels Medium N	Colot06	Test set growth phenotypes obtained from PO1 homokaryon collection	http://neurosporacyc.broadinstitute.org/NC10/NEW-IMAGE?type=GENE&object=NCU07170
NCU01300.5	his-1	test	NORMAL	Vogels Medium N	Colot06	Test set growth phenotypes obtained from PO1 homokaryon collection	http://neurosporacyc.broadinstitute.org/NC10/NEW-IMAGE?type=GENE&object=NCU01300
NCU06714.5	pab-1	test	NORMAL	Vogels Medium N	Colot06	Test set growth phenotypes obtained from PO1 homokaryon collection	http://neurosporacyc.broadinstitute.org/NC10/NEW-IMAGE?type=GENE&object=NCU06714
NCU12069.5	nitrilase	test	NORMAL	Vogels Medium N	Colot06	Test set growth phenotypes obtained from PO1 homokaryon collection	http://neurosporacyc.broadinstitute.org/NC10/NEW-IMAGE?type=GENE&object=NCU12087
NCU02954.5	lys-7	test	NORMAL	Vogels Medium N	Colot06	Test set growth phenotypes obtained from PO1 homokaryon collection	http://neurosporacyc.broadinstitute.org/NC10/NEW-IMAGE?type=GENE&object=NCU02954
NCU01143.5	DEAD/DEAH box helicase	test	NORMAL	Vogels Medium N	Colot06	Test set growth phenotypes obtained from PO1 homokaryon collection	http://neurosporacyc.broadinstitute.org/NC10/NEW-IMAGE?type=GENE&object=NCU01143
NCU01911.5	GDP/GTP exchange factor Sec2p	test	NORMAL	Vogels Medium N	Colot06	Test set growth phenotypes obtained from PO1 homokaryon collection	http://neurosporacyc.broadinstitute.org/NC10/NEW-IMAGE?type=GENE&object=NCU01911
NCU01870.5	Eno3 protein	test	NORMAL	Vogels Medium N	Colot06	Test set growth phenotypes obtained from PO1 homokaryon collection	http://neurosporacyc.broadinstitute.org/NC10/NEW-IMAGE?type=GENE&object=NCU01870
NCU05457.5	cya-4	test	NORMAL	Vogels Medium N	Colot06	Test set growth phenotypes obtained from PO1 homokaryon collection	http://neurosporacyc.broadinstitute.org/NC10/NEW-IMAGE?type=GENE&object=NCU05457
NCU03267.5	NAD+ kinase Utr1	test	NORMAL	Vogels Medium N	Colot06	Test set growth phenotypes obtained from PO1 homokaryon collection	http://neurosporacyc.broadinstitute.org/NC10/NEW-IMAGE?type=GENE&object=NCU03267
NCU06005.5	glycerol kinase	test	NORMAL	Vogels Medium N	Colot06	Test set growth phenotypes obtained from PO1 homokaryon collection	http://neurosporacyc.broadinstitute.org/NC10/NEW-IMAGE?type=GENE&object=NCU06005
NCU01378.5	acetoacetyl-CoA synthase	test	NORMAL	Vogels Medium N	Colot06	Test set growth phenotypes obtained from PO1 homokaryon collection	http://neurosporacyc.broadinstitute.org/NC10/NEW-IMAGE?type=GENE&object=NCU01378
NCU05683.5	dihydroxy-acid dehydratase	test	NORMAL	Vogels Medium N	Colot06	Test set growth phenotypes obtained from PO1 homokaryon collection	http://neurosporacyc.broadinstitute.org/NC10/NEW-IMAGE?type=GENE&object=NCU05683
NCU08568.5	ADP-ribose pyrophosphatase	test	NORMAL	Vogels Medium N	Colot06	Test set growth phenotypes obtained from PO1 homokaryon collection	http://neurosporacyc.broadinstitute.org/NC10/NEW-IMAGE?type=GENE&object=NCU08568
NCU03223.5	sn-1,2-diacylglycerol cholinephosphotransferase	test	NORMAL	Vogels Medium N	Colot06	Test set growth phenotypes obtained from PO1 homokaryon collection	http://neurosporacyc.broadinstitute.org/NC10/NEW-IMAGE?type=GENE&object=NCU03223
NCU09770.5	acu-8	test	NORMAL	Vogels Medium N	Colot06	Test set growth phenotypes obtained from PO1 homokaryon collection	http://neurosporacyc.broadinstitute.org/NC10/NEW-IMAGE?type=GENE&object=NCU09770
NCU01757.5	asparaginase	test	NORMAL	Vogels Medium N	Colot06	Test set growth phenotypes obtained from PO1 homokaryon collection	http://neurosporacyc.broadinstitute.org/NC10/NEW-IMAGE?type=GENE&object=NCU01757
NCU07334.5	uc-5	test	NORMAL	Vogels Medium N	Colot06	Test set growth phenotypes obtained from PO1 homokaryon collection	http://neurosporacyc.broadinstitute.org/NC10/NEW-IMAGE?type=GENE&object=NCU07334
NCU01654.5	long-chain-fatty-acid-CoA ligase 1	test	NORMAL	Vogels Medium N	Colot06	Test set growth phenotypes obtained from PO1 homokaryon collection	http://neurosporacyc.broadinstitute.org/NC10/NEW-IMAGE?type=GENE&object=NCU01654
NCU06832.5	kin-2	test	NORMAL	Vogels Medium N	Colot06	Test set growth phenotypes obtained from PO1 homokaryon collection	http://neurosporacyc.broadinstitute.org/NC10/NEW-IMAGE?type=GENE&object=NCU06832
NCU04568.5	pantothenate transporter liz1	test	NORMAL	Vogels Medium N	Colot06	Test set growth phenotypes obtained from PO1 homokaryon collection	http://neurosporacyc.broadinstitute.org/NC10/NEW-IMAGE?type=GENE&object=NCU04568
NCU03788.5	cys-16	test	NORMAL	Vogels Medium N	Colot06	Test set growth phenotypes obtained from PO1 homokaryon collection	http://neurosporacyc.broadinstitute.org/NC10/NEW-IMAGE?type=GENE&object=NCU03788
NCU03544.5	conserved hypothetical protein	test	NORMAL	Vogels Medium N	Colot06	Test set growth phenotypes obtained from PO1 homokaryon collection	http://neurosporacyc.broadinstitute.org/NC10/NEW-IMAGE?type=GENE&object=NCU03544
NCU09567.5	myo-inositol-1(or 4)-monophosphatase	test	NORMAL	Vogels Medium N	Colot06	Test set growth phenotypes obtained from PO1 homokaryon collection	http://neurosporacyc.broadinstitute.org/NC10/NEW-IMAGE?type=GENE&object=NCU09567
NCU03611.5	chs-1	test	NORMAL	Vogels Medium N	Colot06	Test set growth phenotypes obtained from PO1 homokaryon collection	http://neurosporacyc.broadinstitute.org/NC10/NEW-IMAGE?type=GENE&object=NCU03611
NCU06845.5	short chain dehydrogenase/reductase	test	NORMAL	Vogels Medium N	Colot06	Test set growth phenotypes obtained from PO1 homokaryon collection	http://neurosporacyc.broadinstitute.org/NC10/NEW-IMAGE?type=GENE&object=NCU06845
NCU01441.5	inosine triphosphate pyrophosphatase	test	NORMAL	Vogels Medium N	Colot06	Test set growth phenotypes obtained from PO1 homokaryon collection	http://neurosporacyc.broadinstitute.org/NC10/NEW-IMAGE?type=GENE&object=NCU01441
NCU00963.5	methylenetetrahydrofolate dehydrogenase	test	NORMAL	Vogels Medium N	Colot06	Test set growth phenotypes obtained from PO1 homokaryon collection	http://neurosporacyc.broadinstitute.org/NC10/NEW-IMAGE?type=GENE&object=NCU00963
NCU00838.5	3-dehydroshikimate dehydratase	test	NORMAL	Vogels Medium N	Colot06	Test set growth phenotypes obtained from PO1 homokaryon collection	http://neurosporacyc.broadinstitute.org/NC10/NEW-IMAGE?type=GENE&object=NCU00838
NCU02476.5	adh-2	test	NORMAL	Vogels Medium N	Colot06	Test set growth phenotypes obtained from PO1 homokaryon collection	http://neurosporacyc.broadinstitute.org/NC10/NEW-IMAGE?type=GENE&object=NCU02476
NCU02408.5	gsl-8	test	NORMAL	Vogels Medium N	Colot06	Test set growth phenotypes obtained from PO1 homokaryon collection	http://neurosporacyc.broadinstitute.org/NC10/NEW-IMAGE?type=GENE&object=NCU02408
NCU02227.5	arg-11	test	NORMAL	Vogels Medium N	Colot06	Test set growth phenotypes obtained from PO1 homokaryon collection	http://neurosporacyc.broadinstitute.org/NC10/NEW-IMAGE?type=GENE&object=NCU02227
NCU03756.5	aromatic amino acid aminotransferase 1	test	NORMAL	Vogels Medium N	Colot06	Test set growth phenotypes obtained from PO1 homokaryon collection	http://neurosporacyc.broadinstitute.org/NC10/NEW-IMAGE?type=GENE&object=NCU03756
NCU05828.5	conserved hypothetical protein	test	NORMAL	Vogels Medium N	Colot06	Test set growth phenotypes obtained from PO1 homokaryon collection	http://neurosporacyc.broadinstitute.org/NC10/NEW-IMAGE?type=GENE&object=NCU05828
NCU09810.5	succinyl-CoA synthetase subunit alpha	test	NORMAL	Vogels Medium N	Colot06	Test set growth phenotypes obtained from PO1 homokaryon collection	http://neurosporacyc.broadinstitute.org/NC10/NEW-IMAGE?type=GENE&object=NCU09810
NCU09183.5	kyn-1	test	NORMAL	Vogels Medium N	Colot06	Test set growth phenotypes obtained from PO1 homokaryon collection	http://neurosporacyc.broadinstitute.org/NC10/NEW-IMAGE?type=GENE&object=NCU09183
NCU04149.5	mitochondrial GTPase	test	NORMAL	Vogels Medium N	Colot06	Test set growth phenotypes obtained from PO1 homokaryon collection	http://neurosporacyc.broadinstitute.org/NC10/NEW-IMAGE?type=GENE&object=NCU04149
NCU08058.5	3-hydroxyacyl-CoA dehydrogenase	test	NORMAL	Vogels Medium N	Colot06	Test set growth phenotypes obtained from PO1 homokaryon collection	http://neurosporacyc.broadinstitute.org/NC10/NEW-IMAGE?type=GENE&object=NCU08058
NCU04352.5	chs-5	test	NORMAL	Vogels Medium N	Colot06	Test set growth phenotypes obtained from PO1 homokaryon collection	http://neurosporacyc.broadinstitute.org/NC10/NEW-IMAGE?type=GENE&object=NCU04352
NCU04642.5	adenosine deaminase	test	NORMAL	Vogels Medium N	Colot06	Test set growth phenotypes obtained from PO1 homokaryon collection	http://neurosporacyc.broadinstitute.org/NC10/NEW-IMAGE?type=GENE&object=NCU04642
NCU05028.5	kinesin	test	NORMAL	Vogels Medium N	Colot06	Test set growth phenotypes obtained from PO1 homokaryon collection	http://neurosporacyc.broadinstitute.org/NC10/NEW-IMAGE?type=GENE&object=NCU05028
NCU02322.5	mannose-6-phosphate isomerase	test	NORMAL	Vogels Medium N	Colot06	Test set growth phenotypes obtained from PO1 homokaryon collection	http://neurosporacyc.broadinstitute.org/NC10/NEW-IMAGE?type=GENE&object=NCU02322
NCU03579.5	alanine racemase	test	NORMAL	Vogels Medium N	Colot06	Test set growth phenotypes obtained from PO1 homokaryon collection	http://neurosporacyc.broadinstitute.org/NC10/NEW-IMAGE?type=GENE&object=NCU03579
NCU06032.5	long-chain fatty acid transporter	test	NORMAL	Vogels Medium N	Colot06	Test set growth phenotypes obtained from PO1 homokaryon collection	http://neurosporacyc.broadinstitute.org/NC10/NEW-IMAGE?type=GENE&object=NCU06032
NCU00597.5	deoxyribose-phosphate aldolase 2	test	NORMAL	Vogels Medium N	Colot06	Test set growth phenotypes obtained from PO1 homokaryon collection	http://neurosporacyc.broadinstitute.org/NC10/NEW-IMAGE?type=GENE&object=NCU00597
NCU05290.5	pyr-2	test	NORMAL	Vogels Medium N	Colot06	Test set growth phenotypes obtained from PO1 homokaryon collection	http://neurosporacyc.broadinstitute.org/NC10/NEW-IMAGE?type=GENE&object=NCU05290
NCU03617.5	haloacid dehalogenase	test	NORMAL	Vogels Medium N	Colot06	Test set growth phenotypes obtained from PO1 homokaryon collection	http://neurosporacyc.broadinstitute.org/NC10/NEW-IMAGE?type=GENE&object=NCU03617
NCU02585.5	aspartyl-tRNA synthetase	test	NORMAL	Vogels Medium N	Colot06	Test set growth phenotypes obtained from PO1 homokaryon collection	http://neurosporacyc.broadinstitute.org/NC10/NEW-IMAGE?type=GENE&object=NCU02585
NCU10220.5	POS9-activating factor FAP7	test	NORMAL	Vogels Medium N	Colot06	Test set growth phenotypes obtained from PO1 homokaryon collection	http://neurosporacyc.broadinstitute.org/NC10/NEW-IMAGE?type=GENE&object=NCU10220
NCU05807.5	isochorismatase family	test	NORMAL	Vogels Medium N	Colot06	Test set growth phenotypes obtained from PO1 homokaryon collection	http://neurosporacyc.broadinstitute.org/NC10/NEW-IMAGE?type=GENE&object=NCU05807
NCU01922.5	conserved hypothetical protein	test	NORMAL	Vogels Medium N	Colot06	Test set growth phenotypes obtained from PO1 homokaryon collection	http://neurosporacyc.broadinstitute.org/NC10/NEW-IMAGE?type=GENE&object=NCU01922
NCU07884.5	mitochondrial oxaloacetate transporter	test	NORMAL	Vogels Medium N	Colot06	Test set growth phenotypes obtained from PO1 homokaryon collection	http://neurosporacyc.broadinstitute.org/NC10/NEW-IMAGE?type=GENE&object=NCU07884
NCU05542.5	xanthine phosphoribosyltransferase 1	test	NORMAL	Vogels Medium N	Colot06	Test set growth phenotypes obtained from PO1 homokaryon collection	http://neurosporacyc.broadinstitute.org/NC10/NEW-IMAGE?type=GENE&object=NCU05542
NCU07442.5	betaine aldehyde dehydrogenase	test	NORMAL	Vogels Medium N	Colot06	Test set growth phenotypes obtained from PO1 homokaryon collection	http://neurosporacyc.broadinstitute.org/NC10/NEW-IMAGE?type=GENE&object=NCU07442
NCU05887.5	oxidoreductase	test	NORMAL	Vogels Medium N	Colot06	Test set growth phenotypes obtained from PO1 homokaryon collection	http://neurosporacyc.broadinstitute.org/NC10/NEW-IMAGE?type=GENE&object=NCU05887
NCU00293.5	NADH pyrophosphatase	test	NORMAL	Vogels Medium N	Colot06	Test set growth phenotypes obtained from PO1 homokaryon collection	http://neurosporacyc.broadinstitute.org/NC10/NEW-IMAGE?type=GENE&object=NCU00293
NCU07309.5	guanine deaminase	test	NORMAL	Vogels Medium N	Colot06	Test set growth phenotypes obtained from PO1 homokaryon collection	http://neurosporacyc.broadinstitute.org/NC10/NEW-IMAGE?type=GENE&object=NCU07309
NCU05180.5	kinesin family protein	test	NORMAL	Vogels Medium N	Colot06	Test set growth phenotypes obtained from PO1 homokaryon collection	http://neurosporacyc.broadinstitute.org/NC10/NEW-IMAGE?type=GENE&object=NCU05180
NCU08828.5	fox-2	test	NORMAL	Vogels Medium N	Colot06	Test set growth phenotypes obtained from PO1 homokaryon collection	http://neurosporacyc.broadinstitute.org/NC10/NEW-IMAGE?type=GENE&object=NCU08828
NCU04743.5	tubulin-tyrosine ligase	test	NORMAL	Vogels Medium N	Colot06	Test set growth phenotypes obtained from PO1 homokaryon collection	http://neurosporacyc.broadinstitute.org/NC10/NEW-IMAGE?type=GENE&object=NCU04743
NCU06043.5	GPR/FUN34 family protein	test	NORMAL	Vogels Medium N	Colot06	Test set growth phenotypes obtained from PO1 homokaryon collection	http://neurosporacyc.broadinstitute.org/NC10/NEW-IMAGE?type=GENE&object=NCU06043
NCU04768.5	electron transfer flavoprotein-ubiquinone oxidoreductase	test	NORMAL	Vogels Medium N	Colot06	Test set growth phenotypes obtained from PO1 homokaryon collection	http://neurosporacyc.broadinstitute.org/NC10/NEW-IMAGE?type=GENE&object=NCU04768
NCU05830.5	general amino-acid permease GAP1	test	NORMAL	Vogels Medium N	Colot06	Test set growth phenotypes obtained from PO1 homokaryon collection	http://neurosporacyc.broadinstitute.org/NC10/NEW-IMAGE?type=GENE&object=NCU05830
NCU05198.5	general amino acid permease	test	NORMAL	Vogels Medium N	Colot06	Test set growth phenotypes obtained from PO1 homokaryon collection	http://neurosporacyc.broadinstitute.org/NC10/NEW-IMAGE?type=GENE&object=NCU05198
NCU09497.5	bifunctional D12/D15 fatty acid desaturase	test	NORMAL	Vogels Medium N	Colot06	Test set growth phenotypes obtained from PO1 homokaryon collection	http://neurosporacyc.broadinstitute.org/NC10/NEW-IMAGE?type=GENE&object=NCU09497
NCU10110.5	3-hydroxyisobutyrate dehydrogenase	test	NORMAL	Vogels Medium N	Colot06	Test set growth phenotypes obtained from PO1 homokaryon collection	http://neurosporacyc.broadinstitute.org/NC10/NEW-IMAGE?type=GENE&object=NCU10110
NCU04856.5	gln-2	test	NORMAL	Vogels Medium N	Colot06	Test set growth phenotypes obtained from PO1 homokaryon collection	http://neurosporacyc.broadinstitute.org/NC10/NEW-IMAGE?type=GENE&object=NCU04856
NCU03127.5	ure-4	test	NORMAL	Vogels Medium N	Colot06	Test set growth phenotypes obtained from PO1 homokaryon collection	http://neurosporacyc.broadinstitute.org/NC10/NEW-IMAGE?type=GENE&object=NCU03127
NCU04387.5	vma-7	test	NORMAL	Vogels Medium N	Colot06	Test set growth phenotypes obtained from PO1 homokaryon collection	http://neurosporacyc.broadinstitute.org/NC10/NEW-IMAGE?type=GENE&object=NCU04387
NCU06261.5	uracil phosphoribosyltransferase	test	NORMAL	Vogels Medium N	Colot06	Test set growth phenotypes obtained from PO1 homokaryon collection	http://neurosporacyc.broadinstitute.org/NC10/NEW-IMAGE?type=GENE&object=NCU06261
NCU06025.5	qa-3	test	NORMAL	Vogels Medium N	Colot06	Test set growth phenotypes obtained from PO1 homokaryon collection	http://neurosporacyc.broadinstitute.org/NC10/NEW-IMAGE?type=GENE&object=NCU06025
NCU03381.5	phosphatidate cytidylyltransferase	test	NORMAL	Vogels Medium N	Colot06	Test set growth phenotypes obtained from PO1 homokaryon collection	http://neurosporacyc.broadinstitute.org/NC10/NEW-IMAGE?type=GENE&object=NCU03381
NCU06353.5	conserved hypothetical protein	test	NORMAL	Vogels Medium N	Colot06	Test set growth phenotypes obtained from PO1 homokaryon collection	http://neurosporacyc.broadinstitute.org/NC10/NEW-IMAGE?type=GENE&object=NCU06353
NCU07930.5	cys-18	test	NORMAL	Vogels Medium N	Colot06	Test set growth phenotypes obtained from PO1 homokaryon collection	http://neurosporacyc.broadinstitute.org/NC10/NEW-IMAGE?type=GENE&object=NCU07930
NCU06783.5	ATP citrate lyase	test	NORMAL	Vogels Medium N	Colot06	Test set growth phenotypes obtained from PO1 homokaryon collection	http://neurosporacyc.broadinstitute.org/NC10/NEW-IMAGE?type=GENE&object=NCU06783
NCU03929.5	acyl-CoA synthetase	test	NORMAL	Vogels Medium N	Colot06	Test set growth phenotypes obtained from PO1 homokaryon collection	http://neurosporacyc.broadinstitute.org/NC10/NEW-IMAGE?type=GENE&object=NCU03929
NCU05376.5	p450 monooxygenase	test	NORMAL	Vogels Medium N	Colot06	Test set growth phenotypes obtained from PO1 homokaryon collection	http://neurosporacyc.broadinstitute.org/NC10/NEW-IMAGE?type=GENE&object=NCU05376
NCU05577.5	gh3-5	test	NORMAL	Vogels Medium N	Colot06	Test set growth phenotypes obtained from PO1 homokaryon collection	http://neurosporacyc.broadinstitute.org/NC10/NEW-IMAGE?type=GENE&object=NCU05577
NCU06123.5	phosphoketolase	test	NORMAL	Vogels Medium N	Colot06	Test set growth phenotypes obtained from PO1 homokaryon collection	http://neurosporacyc.broadinstitute.org/NC10/NEW-IMAGE?type=GENE&object=NCU06123
NCU04963.5	high-affinity glucose transporter	test	NORMAL	Vogels Medium N	Colot06	Test set growth phenotypes obtained from PO1 homokaryon collection	http://neurosporacyc.broadinstitute.org/NC10/NEW-IMAGE?type=GENE&object=NCU04963
NCU03257.5	tam-1	test	NORMAL	Vogels Medium N	Colot06	Test set growth phenotypes obtained from PO1 homokaryon collection	http://neurosporacyc.broadinstitute.org/NC10/NEW-IMAGE?type=GENE&object=NCU03257
NCU09862.5	coq-5	test	NORMAL	Vogels Medium N	Colot06	Test set growth phenotypes obtained from PO1 homokaryon collection	http://neurosporacyc.broadinstitute.org/NC10/NEW-IMAGE?type=GENE&object=NCU09862
NCU00742.5	glycerol-3-phosphate dehydrogenase	test	NORMAL	Vogels Medium N	Colot06	Test set growth phenotypes obtained from PO1 homokaryon collection	http://neurosporacyc.broadinstitute.org/NC10/NEW-IMAGE?type=GENE&object=NCU00742
NCU10058.5	rg-1	test	NORMAL	Vogels Medium N	Colot06	Test set growth phenotypes obtained from PO1 homokaryon collection	http://neurosporacyc.broadinstitute.org/NC10/NEW-IMAGE?type=GENE&object=NCU10058
NCU06023.5	qa-2	test	NORMAL	Vogels Medium N	Colot06	Test set growth phenotypes obtained from PO1 homokaryon collection	http://neurosporacyc.broadinstitute.org/NC10/NEW-IMAGE?type=GENE&object=NCU06023
NCU05129.5	trp-2	test	NORMAL	Vogels Medium N	Colot06	Test set growth phenotypes obtained from PO1 homokaryon collection	http://neurosporacyc.broadinstitute.org/NC10/NEW-IMAGE?type=GENE&object=NCU05129
NCU01689.5	mitochondrial DNA replication protein YHM2	test	NORMAL	Vogels Medium N	Colot06	Test set growth phenotypes obtained from PO1 homokaryon collection	http://neurosporacyc.broadinstitute.org/NC10/NEW-IMAGE?type=GENE&object=NCU01689
NCU03561.5	mitochondrial carrier protein	test	NORMAL	Vogels Medium N	Colot06	Test set growth phenotypes obtained from PO1 homokaryon collection	http://neurosporacyc.broadinstitute.org/NC10/NEW-IMAGE?type=GENE&object=NCU03561
NCU06803.5	glutamate decarboxylase	test	NORMAL	Vogels Medium N	Colot06	Test set growth phenotypes obtained from PO1 homokaryon collection	http://neurosporacyc.broadinstitute.org/NC10/NEW-IMAGE?type=GENE&object=NCU06803
NCU07362.5	L-lactate ferricytochrome c oxidoreductase	test	NORMAL	Vogels Medium N	Colot06	Test set growth phenotypes obtained from PO1 homokaryon collection	http://neurosporacyc.broadinstitute.org/NC10/NEW-IMAGE?type=GENE&object=NCU07362
NCU01446.5	uc-4	test	NORMAL	Vogels Medium N	Colot06	Test set growth phenotypes obtained from PO1 homokaryon collection	http://neurosporacyc.broadinstitute.org/NC10/NEW-IMAGE?type=GENE&object=NCU01446
NCU03117.5	gua-1	test	NORMAL	Vogels Medium N	Colot06	Test set growth phenotypes obtained from PO1 homokaryon collection	http://neurosporacyc.broadinstitute.org/NC10/NEW-IMAGE?type=GENE&object=NCU03117
NCU11963.5	short chain dehydrogenase	test	NORMAL	Vogels Medium N	Colot06	Test set growth phenotypes obtained from PO1 homokaryon collection	http://neurosporacyc.broadinstitute.org/NC10/NEW-IMAGE?type=GENE&object=NCU11992
NCU05548.5	aro-6	test	NORMAL	Vogels Medium N	Colot06	Test set growth phenotypes obtained from PO1 homokaryon collection	http://neurosporacyc.broadinstitute.org/NC10/NEW-IMAGE?type=GENE&object=NCU05548
NCU04621.5	lipoxygenase	test	NORMAL	Vogels Medium N	Colot06	Test set growth phenotypes obtained from PO1 homokaryon collection	http://neurosporacyc.broadinstitute.org/NC10/NEW-IMAGE?type=GENE&object=NCU04621
NCU08326.5	mitochondrial carrier protein LEU5	test	NORMAL	Vogels Medium N	Colot06	Test set growth phenotypes obtained from PO1 homokaryon collection	http://neurosporacyc.broadinstitute.org/NC10/NEW-IMAGE?type=GENE&object=NCU08326
NCU00585.5	al-2	test	NORMAL	Vogels Medium N	Colot06	Test set growth phenotypes obtained from PO1 homokaryon collection	http://neurosporacyc.broadinstitute.org/NC10/NEW-IMAGE?type=GENE&object=NCU00585
NCU04393.5	3-hydroxyacyl-CoA dehydrogenase	test	NORMAL	Vogels Medium N	Colot06	Test set growth phenotypes obtained from PO1 homokaryon collection	http://neurosporacyc.broadinstitute.org/NC10/NEW-IMAGE?type=GENE&object=NCU04393
NCU02802.5	arg-13	test	NORMAL	Vogels Medium N	Colot06	Test set growth phenotypes obtained from PO1 homokaryon collection	http://neurosporacyc.broadinstitute.org/NC10/NEW-IMAGE?type=GENE&object=NCU02802
NCU05967.5	conserved hypothetical protein	test	NORMAL	Vogels Medium N	Colot06	Test set growth phenotypes obtained from PO1 homokaryon collection	http://neurosporacyc.broadinstitute.org/NC10/NEW-IMAGE?type=GENE&object=NCU05967
NCU07199.5	major myo-inositol transporter iolT	test	NORMAL	Vogels Medium N	Colot06	Test set growth phenotypes obtained from PO1 homokaryon collection	http://neurosporacyc.broadinstitute.org/NC10/NEW-IMAGE?type=GENE&object=NCU07199
NCU00743.5	glycogen debranching enzyme	test	NORMAL	Vogels Medium N	Colot06	Test set growth phenotypes obtained from PO1 homokaryon collection	http://neurosporacyc.broadinstitute.org/NC10/NEW-IMAGE?type=GENE&object=NCU00743
NCU02906.5	NAD-dependent malic enzyme 1	test	NORMAL	Vogels Medium N	Colot06	Test set growth phenotypes obtained from PO1 homokaryon collection	http://neurosporacyc.broadinstitute.org/NC10/NEW-IMAGE?type=GENE&object=NCU02906
NCU01993.5	ethanolaminephosphotransferase	test	NORMAL	Vogels Medium N	Colot06	Test set growth phenotypes obtained from PO1 homokaryon collection	http://neurosporacyc.broadinstitute.org/NC10/NEW-IMAGE?type=GENE&object=NCU01993
NCU01270.5	rpd	test	NORMAL	Vogels Medium N	Colot06	Test set growth phenotypes obtained from PO1 homokaryon collection	http://neurosporacyc.broadinstitute.org/NC10/NEW-IMAGE?type=GENE&object=NCU01270
NCU10675.5	methionine permease	test	NORMAL	Vogels Medium N	Colot06	Test set growth phenotypes obtained from PO1 homokaryon collection	http://neurosporacyc.broadinstitute.org/NC10/NEW-IMAGE?type=GENE&object=NCU10675
NCU06358.5	high affinity glucose transporter RGT2	test	NORMAL	Vogels Medium N	Colot06	Test set growth phenotypes obtained from PO1 homokaryon collection	http://neurosporacyc.broadinstitute.org/NC10/NEW-IMAGE?type=GENE&object=NCU06358
NCU08272.5	cytochrome b2	test	NORMAL	Vogels Medium N	Colot06	Test set growth phenotypes obtained from PO1 homokaryon collection	http://neurosporacyc.broadinstitute.org/NC10/NEW-IMAGE?type=GENE&object=NCU08272
NCU01065.5	ammonium transporter MEP2	test	NORMAL	Vogels Medium N	Colot06	Test set growth phenotypes obtained from PO1 homokaryon collection	http://neurosporacyc.broadinstitute.org/NC10/NEW-IMAGE?type=GENE&object=NCU01065
NCU09041.5	L-xylulose reductase	test	NORMAL	Vogels Medium N	Colot06	Test set growth phenotypes obtained from PO1 homokaryon collection	http://neurosporacyc.broadinstitute.org/NC10/NEW-IMAGE?type=GENE&object=NCU09041
NCU00936.5	succinate semialdehyde dehydrogenase	test	NORMAL	Vogels Medium N	Colot06	Test set growth phenotypes obtained from PO1 homokaryon collection	http://neurosporacyc.broadinstitute.org/NC10/NEW-IMAGE?type=GENE&object=NCU00936
NCU05133.5	udp-glucose 4-epimerase	test	NORMAL	Vogels Medium N	Colot06	Test set growth phenotypes obtained from PO1 homokaryon collection	http://neurosporacyc.broadinstitute.org/NC10/NEW-IMAGE?type=GENE&object=NCU05133
NCU06112.5	glutamate decarboxylase	test	NORMAL	Vogels Medium N	Colot06	Test set growth phenotypes obtained from PO1 homokaryon collection	http://neurosporacyc.broadinstitute.org/NC10/NEW-IMAGE?type=GENE&object=NCU06112
NCU05151.5	phosphoketolase	test	NORMAL	Vogels Medium N	Colot06	Test set growth phenotypes obtained from PO1 homokaryon collection	http://neurosporacyc.broadinstitute.org/NC10/NEW-IMAGE?type=GENE&object=NCU05151
NCU00943.5	tre-1	test	NORMAL	Vogels Medium N	Colot06	Test set growth phenotypes obtained from PO1 homokaryon collection	http://neurosporacyc.broadinstitute.org/NC10/NEW-IMAGE?type=GENE&object=NCU00943
NCU09565.5	conserved hypothetical protein	test	NORMAL	Vogels Medium N	Colot06	Test set growth phenotypes obtained from PO1 homokaryon collection	http://neurosporacyc.broadinstitute.org/NC10/NEW-IMAGE?type=GENE&object=NCU09565
NCU03768.5	lysophospholipase	test	NORMAL	Vogels Medium N	Colot06	Test set growth phenotypes obtained from PO1 homokaryon collection	http://neurosporacyc.broadinstitute.org/NC10/NEW-IMAGE?type=GENE&object=NCU03768
NCU07375.5	MFS phosphate transporter	test	NORMAL	Vogels Medium N	Colot06	Test set growth phenotypes obtained from PO1 homokaryon collection	http://neurosporacyc.broadinstitute.org/NC10/NEW-IMAGE?type=GENE&object=NCU07375
NCU04721.5	neutral ceramidase	test	NORMAL	Vogels Medium N	Colot06	Test set growth phenotypes obtained from PO1 homokaryon collection	http://neurosporacyc.broadinstitute.org/NC10/NEW-IMAGE?type=GENE&object=NCU04721
NCU07082.5	aspartyl-tRNA synthetase	test	NORMAL	Vogels Medium N	Colot06	Test set growth phenotypes obtained from PO1 homokaryon collection	http://neurosporacyc.broadinstitute.org/NC10/NEW-IMAGE?type=GENE&object=NCU07082
NCU04008.5	mitochondrial ATPase	test	NORMAL	Vogels Medium N	Colot06	Test set growth phenotypes obtained from PO1 homokaryon collection	http://neurosporacyc.broadinstitute.org/NC10/NEW-IMAGE?type=GENE&object=NCU04008
NCU06207.5	erg-10	test	NORMAL	Vogels Medium N	Colot06	Test set growth phenotypes obtained from PO1 homokaryon collection	http://neurosporacyc.broadinstitute.org/NC10/NEW-IMAGE?type=GENE&object=NCU06207
NCU09621.5	guanine deaminase	test	NORMAL	Vogels Medium N	Colot06	Test set growth phenotypes obtained from PO1 homokaryon collection	http://neurosporacyc.broadinstitute.org/NC10/NEW-IMAGE?type=GENE&object=NCU09621
NCU06194.5	MBOAT family protein	test	NORMAL	Vogels Medium N	Colot06	Test set growth phenotypes obtained from PO1 homokaryon collection	http://neurosporacyc.broadinstitute.org/NC10/NEW-IMAGE?type=GENE&object=NCU06194
NCU05805.5	serine hydroxymethyltransferase	test	NORMAL	Vogels Medium N	Colot06	Test set growth phenotypes obtained from PO1 homokaryon collection	http://neurosporacyc.broadinstitute.org/NC10/NEW-IMAGE?type=GENE&object=NCU05805
NCU07937.5	gsl-18	test	NORMAL	Vogels Medium N	Colot06	Test set growth phenotypes obtained from PO1 homokaryon collection	http://neurosporacyc.broadinstitute.org/NC10/NEW-IMAGE?type=GENE&object=NCU07937
NCU08398.5	aldose 1-epimerase	test	NORMAL	Vogels Medium N	Colot06	Test set growth phenotypes obtained from PO1 homokaryon collection	http://neurosporacyc.broadinstitute.org/NC10/NEW-IMAGE?type=GENE&object=NCU08398
NCU08027.5	nucleoside diphosphatase	test	NORMAL	Vogels Medium N	Colot06	Test set growth phenotypes obtained from PO1 homokaryon collection	http://neurosporacyc.broadinstitute.org/NC10/NEW-IMAGE?type=GENE&object=NCU08027
NCU04592.5	3-oxoacyl-(acyl-carrier-protein) reductase	test	NORMAL	Vogels Medium N	Colot06	Test set growth phenotypes obtained from PO1 homokaryon collection	http://neurosporacyc.broadinstitute.org/NC10/NEW-IMAGE?type=GENE&object=NCU04592
NCU01231.5	carboxylic acid transporter	test	NORMAL	Vogels Medium N	Colot06	Test set growth phenotypes obtained from PO1 homokaryon collection	http://neurosporacyc.broadinstitute.org/NC10/NEW-IMAGE?type=GENE&object=NCU01231
NCU07140.5	allantoate transporter	test	NORMAL	Vogels Medium N	Colot06	Test set growth phenotypes obtained from PO1 homokaryon collection	http://neurosporacyc.broadinstitute.org/NC10/NEW-IMAGE?type=GENE&object=NCU07140
NCU01514.5	mitochondrial dicarboxylate carrier	test	NORMAL	Vogels Medium N	Colot06	Test set growth phenotypes obtained from PO1 homokaryon collection	http://neurosporacyc.broadinstitute.org/NC10/NEW-IMAGE?type=GENE&object=NCU01514
NCU10106.5	mitochondrial triosephosphate isomerase	test	NORMAL	Vogels Medium N	Colot06	Test set growth phenotypes obtained from PO1 homokaryon collection	http://neurosporacyc.broadinstitute.org/NC10/NEW-IMAGE?type=GENE&object=NCU10106
NCU04837.5	mitochondrial 2-oxodicarboxylate carrier 1	test	NORMAL	Vogels Medium N	Colot06	Test set growth phenotypes obtained from PO1 homokaryon collection	http://neurosporacyc.broadinstitute.org/NC10/NEW-IMAGE?type=GENE&object=NCU04837
NCU03651.5	NADP-dependent malic enzyme	test	NORMAL	Vogels Medium N	Colot06	Test set growth phenotypes obtained from PO1 homokaryon collection	http://neurosporacyc.broadinstitute.org/NC10/NEW-IMAGE?type=GENE&object=NCU03651
NCU02786.5	conserved hypothetical protein	test	NORMAL	Vogels Medium N	Colot06	Test set growth phenotypes obtained from PO1 homokaryon collection	http://neurosporacyc.broadinstitute.org/NC10/NEW-IMAGE?type=GENE&object=NCU02786
NCU04728.5	hexokinase-1	test	NORMAL	Vogels Medium N	Colot06	Test set growth phenotypes obtained from PO1 homokaryon collection	http://neurosporacyc.broadinstitute.org/NC10/NEW-IMAGE?type=GENE&object=NCU04728
NCU06348.5	myo-inositol-1-monophosphotase	test	NORMAL	Vogels Medium N	Colot06	Test set growth phenotypes obtained from PO1 homokaryon collection	http://neurosporacyc.broadinstitute.org/NC10/NEW-IMAGE?type=GENE&object=NCU06348
NCU07022.5	sorbitol dehydrogenase	test	NORMAL	Vogels Medium N	Colot06	Test set growth phenotypes obtained from PO1 homokaryon collection	http://neurosporacyc.broadinstitute.org/NC10/NEW-IMAGE?type=GENE&object=NCU07022
NCU04923.5	gcy-1	test	NORMAL	Vogels Medium N	Colot06	Test set growth phenotypes obtained from PO1 homokaryon collection	http://neurosporacyc.broadinstitute.org/NC10/NEW-IMAGE?type=GENE&object=NCU04923
NCU08703.5	inorganic pyrophosphatase	test	NORMAL	Vogels Medium N	Colot06	Test set growth phenotypes obtained from PO1 homokaryon collection	http://neurosporacyc.broadinstitute.org/NC10/NEW-IMAGE?type=GENE&object=NCU08703
NCU04442.5	GAL10	test	NORMAL	Vogels Medium N	Colot06	Test set growth phenotypes obtained from PO1 homokaryon collection	http://neurosporacyc.broadinstitute.org/NC10/NEW-IMAGE?type=GENE&object=NCU04442
NCU09792.5	UDP-galactose transporter Gms1	test	NORMAL	Vogels Medium N	Colot06	Test set growth phenotypes obtained from PO1 homokaryon collection	http://neurosporacyc.broadinstitute.org/NC10/NEW-IMAGE?type=GENE&object=NCU09792
NCU04936.5	UDP-glucose 6-dehydrogenase	test	NORMAL	Vogels Medium N	Colot06	Test set growth phenotypes obtained from PO1 homokaryon collection	http://neurosporacyc.broadinstitute.org/NC10/NEW-IMAGE?type=GENE&object=NCU04936
NCU09844.5	amidohydrolase	test	NORMAL	Vogels Medium N	Colot06	Test set growth phenotypes obtained from PO1 homokaryon collection	http://neurosporacyc.broadinstitute.org/NC10/NEW-IMAGE?type=GENE&object=NCU09844
NCU04942.5	methionine permease	test	NORMAL	Vogels Medium N	Colot06	Test set growth phenotypes obtained from PO1 homokaryon collection	http://neurosporacyc.broadinstitute.org/NC10/NEW-IMAGE?type=GENE&object=NCU04942
NCU08549.5	UDP-galactose 4-epimerase	test	NORMAL	Vogels Medium N	Colot06	Test set growth phenotypes obtained from PO1 homokaryon collection	http://neurosporacyc.broadinstitute.org/NC10/NEW-IMAGE?type=GENE&object=NCU08549
NCU07205.5	nit-10	test	NORMAL	Vogels Medium N	Colot06	Test set growth phenotypes obtained from PO1 homokaryon collection	http://neurosporacyc.broadinstitute.org/NC10/NEW-IMAGE?type=GENE&object=NCU07205
NCU04727.5	glucosamine-6-phosphate deaminase	test	NORMAL	Vogels Medium N	Colot06	Test set growth phenotypes obtained from PO1 homokaryon collection	http://neurosporacyc.broadinstitute.org/NC10/NEW-IMAGE?type=GENE&object=NCU04727
NCU03648.5	glutaminase A	test	NORMAL	Vogels Medium N	Colot06	Test set growth phenotypes obtained from PO1 homokaryon collection	http://neurosporacyc.broadinstitute.org/NC10/NEW-IMAGE?type=GENE&object=NCU03648
NCU06613.5	tam-3	test	NORMAL	Vogels Medium N	Colot06	Test set growth phenotypes obtained from PO1 homokaryon collection	http://neurosporacyc.broadinstitute.org/NC10/NEW-IMAGE?type=GENE&object=NCU06613
NCU04623.5	gh35-2	test	NORMAL	Vogels Medium N	Colot06	Test set growth phenotypes obtained from PO1 homokaryon collection	http://neurosporacyc.broadinstitute.org/NC10/NEW-IMAGE?type=GENE&object=NCU04623
NCU06543.5	acyl-CoA dehydrogenase	test	NORMAL	Vogels Medium N	Colot06	Test set growth phenotypes obtained from PO1 homokaryon collection	http://neurosporacyc.broadinstitute.org/NC10/NEW-IMAGE?type=GENE&object=NCU06543
NCU06846.5	MFS myo-inositol transporter	test	NORMAL	Vogels Medium N	Colot06	Test set growth phenotypes obtained from PO1 homokaryon collection	http://neurosporacyc.broadinstitute.org/NC10/NEW-IMAGE?type=GENE&object=NCU06846
NCU05268.5	chs-6	test	NORMAL	Vogels Medium N	Colot06	Test set growth phenotypes obtained from PO1 homokaryon collection	http://neurosporacyc.broadinstitute.org/NC10/NEW-IMAGE?type=GENE&object=NCU05268
NCU02468.5	longevity-assurance protein	test	NORMAL	Vogels Medium N	Colot06	Test set growth phenotypes obtained from PO1 homokaryon collection	http://neurosporacyc.broadinstitute.org/NC10/NEW-IMAGE?type=GENE&object=NCU02468
NCU01813.5	high affinity glucose transporter	test	NORMAL	Vogels Medium N	Colot06	Test set growth phenotypes obtained from PO1 homokaryon collection	http://neurosporacyc.broadinstitute.org/NC10/NEW-IMAGE?type=GENE&object=NCU01813
NCU03216.5	adenylate kinase	test	NORMAL	Vogels Medium N	Colot06	Test set growth phenotypes obtained from PO1 homokaryon collection	http://neurosporacyc.broadinstitute.org/NC10/NEW-IMAGE?type=GENE&object=NCU03216
NCU04466.5	cyanamide hydratase	test	NORMAL	Vogels Medium N	Colot06	Test set growth phenotypes obtained from PO1 homokaryon collection	http://neurosporacyc.broadinstitute.org/NC10/NEW-IMAGE?type=GENE&object=NCU04466
NCU05770.5	cat-2	test	NORMAL	Vogels Medium N	Colot06	Test set growth phenotypes obtained from PO1 homokaryon collection	http://neurosporacyc.broadinstitute.org/NC10/NEW-IMAGE?type=GENE&object=NCU05770
NCU07741.5	1-acyl-sn-glycerol-3-phosphate acyltransferase 2	test	NORMAL	Vogels Medium N	Colot06	Test set growth phenotypes obtained from PO1 homokaryon collection	http://neurosporacyc.broadinstitute.org/NC10/NEW-IMAGE?type=GENE&object=NCU07741
NCU06673.5	deoxycytidylate deaminase	test	NORMAL	Vogels Medium N	Colot06	Test set growth phenotypes obtained from PO1 homokaryon collection	http://neurosporacyc.broadinstitute.org/NC10/NEW-IMAGE?type=GENE&object=NCU06673
NCU09692.5	phosphatidic acid phosphatase beta	test	NORMAL	Vogels Medium N	Colot06	Test set growth phenotypes obtained from PO1 homokaryon collection	http://neurosporacyc.broadinstitute.org/NC10/NEW-IMAGE?type=GENE&object=NCU09692
NCU03497.5	plasma membrane iron permease	test	NORMAL	Vogels Medium N	Colot06	Test set growth phenotypes obtained from PO1 homokaryon collection	http://neurosporacyc.broadinstitute.org/NC10/NEW-IMAGE?type=GENE&object=NCU03497
NCU04581.5	kinesin	test	NORMAL	Vogels Medium N	Colot06	Test set growth phenotypes obtained from PO1 homokaryon collection	http://neurosporacyc.broadinstitute.org/NC10/NEW-IMAGE?type=GENE&object=NCU04581
NCU05853.5	MFS sugar transporter	test	NORMAL	Vogels Medium N	Colot06	Test set growth phenotypes obtained from PO1 homokaryon collection	http://neurosporacyc.broadinstitute.org/NC10/NEW-IMAGE?type=GENE&object=NCU05853
NCU00378.5	aldehyde dehydrogenase	test	NORMAL	Vogels Medium N	Colot06	Test set growth phenotypes obtained from PO1 homokaryon collection	http://neurosporacyc.broadinstitute.org/NC10/NEW-IMAGE?type=GENE&object=NCU00378
NCU00988.5	MFS quinate transporter	test	NORMAL	Vogels Medium N	Colot06	Test set growth phenotypes obtained from PO1 homokaryon collection	http://neurosporacyc.broadinstitute.org/NC10/NEW-IMAGE?type=GENE&object=NCU00988
NCU04069.5	3'-phosphoadenosine 5'-phosphatase isoform B	test	NORMAL	Vogels Medium N	Colot06	Test set growth phenotypes obtained from PO1 homokaryon collection	http://neurosporacyc.broadinstitute.org/NC10/NEW-IMAGE?type=GENE&object=NCU04069
NCU02287.5	acd-1	test	NORMAL	Vogels Medium N	Colot06	Test set growth phenotypes obtained from PO1 homokaryon collection	http://neurosporacyc.broadinstitute.org/NC10/NEW-IMAGE?type=GENE&object=NCU02287
NCU04251.5	chs-3	test	NORMAL	Vogels Medium N	Colot06	Test set growth phenotypes obtained from PO1 homokaryon collection	http://neurosporacyc.broadinstitute.org/NC10/NEW-IMAGE?type=GENE&object=NCU04251
NCU04775.5	nicotinamide N-methyltransferase	test	NORMAL	Vogels Medium N	Colot06	Test set growth phenotypes obtained from PO1 homokaryon collection	http://neurosporacyc.broadinstitute.org/NC10/NEW-IMAGE?type=GENE&object=NCU04775
NCU03973.5	ala	test	NORMAL	Vogels Medium N	Colot06	Test set growth phenotypes obtained from PO1 homokaryon collection	http://neurosporacyc.broadinstitute.org/NC10/NEW-IMAGE?type=GENE&object=NCU03973
NCU07836.5	pan-3	test	NORMAL	Vogels Medium N	Colot06	Test set growth phenotypes obtained from PO1 homokaryon collection	http://neurosporacyc.broadinstitute.org/NC10/NEW-IMAGE?type=GENE&object=NCU07836
NCU05499.5	homogentisate 1,2-dioxygenase	test	NORMAL	Vogels Medium N	Colot06	Test set growth phenotypes obtained from PO1 homokaryon collection	http://neurosporacyc.broadinstitute.org/NC10/NEW-IMAGE?type=GENE&object=NCU05499
NCU05843.5	tam-2	test	NORMAL	Vogels Medium N	Colot06	Test set growth phenotypes obtained from PO1 homokaryon collection	http://neurosporacyc.broadinstitute.org/NC10/NEW-IMAGE?type=GENE&object=NCU05843
NCU07578.5	peroxisomal adenine nucleotide transporter 1	test	NORMAL	Vogels Medium N	Colot06	Test set growth phenotypes obtained from PO1 homokaryon collection	http://neurosporacyc.broadinstitute.org/NC10/NEW-IMAGE?type=GENE&object=NCU07578
NCU05627.5	high affinity glucose transporter ght1	test	NORMAL	Vogels Medium N	Colot06	Test set growth phenotypes obtained from PO1 homokaryon collection	http://neurosporacyc.broadinstitute.org/NC10/NEW-IMAGE?type=GENE&object=NCU05627
NCU06931.5	sulfite oxidase	test	NORMAL	Vogels Medium N	Colot06	Test set growth phenotypes obtained from PO1 homokaryon collection	http://neurosporacyc.broadinstitute.org/NC10/NEW-IMAGE?type=GENE&object=NCU06931
NCU04339.5	ribokinase	test	NORMAL	Vogels Medium N	Colot06	Test set growth phenotypes obtained from PO1 homokaryon collection	http://neurosporacyc.broadinstitute.org/NC10/NEW-IMAGE?type=GENE&object=NCU04339
NCU04460.5	galactose-1-phosphate uridylyltransferase	test	NORMAL	Vogels Medium N	Colot06	Test set growth phenotypes obtained from PO1 homokaryon collection	http://neurosporacyc.broadinstitute.org/NC10/NEW-IMAGE?type=GENE&object=NCU04460
NCU05776.5	amino acid permease	test	NORMAL	Vogels Medium N	Colot06	Test set growth phenotypes obtained from PO1 homokaryon collection	http://neurosporacyc.broadinstitute.org/NC10/NEW-IMAGE?type=GENE&object=NCU05776
NCU08925.5	amine oxidase	test	NORMAL	Vogels Medium N	Colot06	Test set growth phenotypes obtained from PO1 homokaryon collection	http://neurosporacyc.broadinstitute.org/NC10/NEW-IMAGE?type=GENE&object=NCU08925
NCU06342.5	phospholipase D	test	NORMAL	Vogels Medium N	Colot06	Test set growth phenotypes obtained from PO1 homokaryon collection	http://neurosporacyc.broadinstitute.org/NC10/NEW-IMAGE?type=GENE&object=NCU06342
NCU10400.5	phospholipase PldA	test	NORMAL	Vogels Medium N	Colot06	Test set growth phenotypes obtained from PO1 homokaryon collection	http://neurosporacyc.broadinstitute.org/NC10/NEW-IMAGE?type=GENE&object=NCU10400
NCU08180.5	high-affinity glucose transporter	test	NORMAL	Vogels Medium N	Colot06	Test set growth phenotypes obtained from PO1 homokaryon collection	http://neurosporacyc.broadinstitute.org/NC10/NEW-IMAGE?type=GENE&object=NCU08180
NCU03084.5	inosine-uridine preferring nucleoside hydrolase	test	NORMAL	Vogels Medium N	Colot06	Test set growth phenotypes obtained from PO1 homokaryon collection	http://neurosporacyc.broadinstitute.org/NC10/NEW-IMAGE?type=GENE&object=NCU03084
NCU05626.5	conserved hypothetical protein	test	NORMAL	Vogels Medium N	Colot06	Test set growth phenotypes obtained from PO1 homokaryon collection	http://neurosporacyc.broadinstitute.org/NC10/NEW-IMAGE?type=GENE&object=NCU05626
NCU02879.5	zinc/iron transporter	test	NORMAL	Vogels Medium N	Colot06	Test set growth phenotypes obtained from PO1 homokaryon collection	http://neurosporacyc.broadinstitute.org/NC10/NEW-IMAGE?type=GENE&object=NCU02879
NCU06144.5	kinesin	test	NORMAL	Vogels Medium N	Colot06	Test set growth phenotypes obtained from PO1 homokaryon collection	http://neurosporacyc.broadinstitute.org/NC10/NEW-IMAGE?type=GENE&object=NCU06144
NCU00891.5	xylitol dehydrogenase	test	NORMAL	Vogels Medium N	Colot06	Test set growth phenotypes obtained from PO1 homokaryon collection	http://neurosporacyc.broadinstitute.org/NC10/NEW-IMAGE?type=GENE&object=NCU00891
NCU05851.5	4-coumarate-CoA ligase 1	test	NORMAL	Vogels Medium N	Colot06	Test set growth phenotypes obtained from PO1 homokaryon collection	http://neurosporacyc.broadinstitute.org/NC10/NEW-IMAGE?type=GENE&object=NCU05851
NCU04202.5	ndk-1	test	NORMAL	Vogels Medium N	Colot06	Test set growth phenotypes obtained from PO1 homokaryon collection	http://neurosporacyc.broadinstitute.org/NC10/NEW-IMAGE?type=GENE&object=NCU04202
NCU06142.5	conserved hypothetical protein	test	NORMAL	Vogels Medium N	Colot06	Test set growth phenotypes obtained from PO1 homokaryon collection	http://neurosporacyc.broadinstitute.org/NC10/NEW-IMAGE?type=GENE&object=NCU06142
NCU04411.5	trp-4	test	NORMAL	Vogels Medium N	Colot06	Test set growth phenotypes obtained from PO1 homokaryon collection	http://neurosporacyc.broadinstitute.org/NC10/NEW-IMAGE?type=GENE&object=NCU04411
NCU07941.5	aspartate aminotransferase	test	NORMAL	Vogels Medium N	Colot06	Test set growth phenotypes obtained from PO1 homokaryon collection	http://neurosporacyc.broadinstitute.org/NC10/NEW-IMAGE?type=GENE&object=NCU07941
NCU09564.5	pho-4	test	NORMAL	Vogels Medium N	Colot06	Test set growth phenotypes obtained from PO1 homokaryon collection	http://neurosporacyc.broadinstitute.org/NC10/NEW-IMAGE?type=GENE&object=NCU09564
NCU09705.5	GAL10	test	NORMAL	Vogels Medium N	Colot06	Test set growth phenotypes obtained from PO1 homokaryon collection	http://neurosporacyc.broadinstitute.org/NC10/NEW-IMAGE?type=GENE&object=NCU09705
NCU00758.5	formate/nitrite transporter	test	NORMAL	Vogels Medium N	Colot06	Test set growth phenotypes obtained from PO1 homokaryon collection	http://neurosporacyc.broadinstitute.org/NC10/NEW-IMAGE?type=GENE&object=NCU00758
NCU08005.5	NADPH-adrenodoxin reductase Arh1	test	NORMAL	Vogels Medium N	Colot06	Test set growth phenotypes obtained from PO1 homokaryon collection	http://neurosporacyc.broadinstitute.org/NC10/NEW-IMAGE?type=GENE&object=NCU08005
NCU01904.5	2-deoxy-D-gluconate 3-dehydrogenase	test	NORMAL	Vogels Medium N	Colot06	Test set growth phenotypes obtained from PO1 homokaryon collection	http://neurosporacyc.broadinstitute.org/NC10/NEW-IMAGE?type=GENE&object=NCU01904
NCU03290.5	dipeptidyl peptidase	test	NORMAL	Vogels Medium N	Colot06	Test set growth phenotypes obtained from PO1 homokaryon collection	http://neurosporacyc.broadinstitute.org/NC10/NEW-IMAGE?type=GENE&object=NCU03290
NCU08228.5	UDP-glucose dehydrogenase	test	NORMAL	Vogels Medium N	Colot06	Test set growth phenotypes obtained from PO1 homokaryon collection	http://neurosporacyc.broadinstitute.org/NC10/NEW-IMAGE?type=GENE&object=NCU08228
NCU00829.5	ferric reductase	test	NORMAL	Vogels Medium N	Colot06	Test set growth phenotypes obtained from PO1 homokaryon collection	http://neurosporacyc.broadinstitute.org/NC10/NEW-IMAGE?type=GENE&object=NCU00829
NCU05001.5	ent-kaurene oxidase	test	NORMAL	Vogels Medium N	Colot06	Test set growth phenotypes obtained from PO1 homokaryon collection	http://neurosporacyc.broadinstitute.org/NC10/NEW-IMAGE?type=GENE&object=NCU12167
NCU03295.5	4-coumarate-CoA ligase 1	test	NORMAL	Vogels Medium N	Colot06	Test set growth phenotypes obtained from PO1 homokaryon collection	http://neurosporacyc.broadinstitute.org/NC10/NEW-IMAGE?type=GENE&object=NCU03295
NCU04510.5	gcy-3	test	NORMAL	Vogels Medium N	Colot06	Test set growth phenotypes obtained from PO1 homokaryon collection	http://neurosporacyc.broadinstitute.org/NC10/NEW-IMAGE?type=GENE&object=NCU04510
NCU04720.5	nit-6	test	NORMAL	Vogels Medium N	Colot06	Test set growth phenotypes obtained from PO1 homokaryon collection	http://neurosporacyc.broadinstitute.org/NC10/NEW-IMAGE?type=GENE&object=NCU04720
NCU06017.5	thiosulfate sulfurtransferase	test	NORMAL	Vogels Medium N	Colot06	Test set growth phenotypes obtained from PO1 homokaryon collection	http://neurosporacyc.broadinstitute.org/NC10/NEW-IMAGE?type=GENE&object=NCU06017
NCU03741.5	NAD kinase/ATP NAD kinase	test	NORMAL	Vogels Medium N	Colot06	Test set growth phenotypes obtained from PO1 homokaryon collection	http://neurosporacyc.broadinstitute.org/NC10/NEW-IMAGE?type=GENE&object=NCU03741
NCU07564.5	siderophore iron transporter mirC	test	NORMAL	Vogels Medium N	Colot06	Test set growth phenotypes obtained from PO1 homokaryon collection	http://neurosporacyc.broadinstitute.org/NC10/NEW-IMAGE?type=GENE&object=NCU07564
NCU06652.5	S-(hydroxymethyl)glutathione dehydrogenase	test	NORMAL	Vogels Medium N	Colot06	Test set growth phenotypes obtained from PO1 homokaryon collection	http://neurosporacyc.broadinstitute.org/NC10/NEW-IMAGE?type=GENE&object=NCU06652
NCU03243.5	sphingomyelinase	test	NORMAL	Vogels Medium N	Colot06	Test set growth phenotypes obtained from PO1 homokaryon collection	http://neurosporacyc.broadinstitute.org/NC10/NEW-IMAGE?type=GENE&object=NCU03243
NCU05956.5	gh2-2	test	NORMAL	Vogels Medium N	Colot06	Test set growth phenotypes obtained from PO1 homokaryon collection	http://neurosporacyc.broadinstitute.org/NC10/NEW-IMAGE?type=GENE&object=NCU05956
NCU08384.5	xr	test	NORMAL	Vogels Medium N	Colot06	Test set growth phenotypes obtained from PO1 homokaryon collection	http://neurosporacyc.broadinstitute.org/NC10/NEW-IMAGE?type=GENE&object=NCU08384
NCU07300.5	asn-2	test	NORMAL	Vogels Medium N	Colot06	Test set growth phenotypes obtained from PO1 homokaryon collection	http://neurosporacyc.broadinstitute.org/NC10/NEW-IMAGE?type=GENE&object=NCU07300
NCU06996.5	hexokinase-2	test	NORMAL	Vogels Medium N	Colot06	Test set growth phenotypes obtained from PO1 homokaryon collection	http://neurosporacyc.broadinstitute.org/NC10/NEW-IMAGE?type=GENE&object=NCU06996
NCU07465.5	mitochondrial phosphate carrier protein 2	test	NORMAL	Vogels Medium N	Colot06	Test set growth phenotypes obtained from PO1 homokaryon collection	http://neurosporacyc.broadinstitute.org/NC10/NEW-IMAGE?type=GENE&object=NCU07465
NCU07101.5	lipase	test	NORMAL	Vogels Medium N	Colot06	Test set growth phenotypes obtained from PO1 homokaryon collection	http://neurosporacyc.broadinstitute.org/NC10/NEW-IMAGE?type=GENE&object=NCU07101
NCU03607.5	threonine dehydratase catabolic	test	NORMAL	Vogels Medium N	Colot06	Test set growth phenotypes obtained from PO1 homokaryon collection	http://neurosporacyc.broadinstitute.org/NC10/NEW-IMAGE?type=GENE&object=NCU03607
NCU07853.5	uricase	test	NORMAL	Vogels Medium N	Colot06	Test set growth phenotypes obtained from PO1 homokaryon collection	http://neurosporacyc.broadinstitute.org/NC10/NEW-IMAGE?type=GENE&object=NCU07853
NCU04809.5	MFS phospholipid transporter	test	NORMAL	Vogels Medium N	Colot06	Test set growth phenotypes obtained from PO1 homokaryon collection	http://neurosporacyc.broadinstitute.org/NC10/NEW-IMAGE?type=GENE&object=NCU04809
NCU04013.5	ylo-1	test	NORMAL	Vogels Medium N	Colot06	Test set growth phenotypes obtained from PO1 homokaryon collection	http://neurosporacyc.broadinstitute.org/NC10/NEW-IMAGE?type=GENE&object=NCU04013
NCU10359.5	neutral ceramidase	test	NORMAL	Vogels Medium N	Colot06	Test set growth phenotypes obtained from PO1 homokaryon collection	http://neurosporacyc.broadinstitute.org/NC10/NEW-IMAGE?type=GENE&object=NCU10359
NCU08325.5	pho-5	test	NORMAL	Vogels Medium N	Colot06	Test set growth phenotypes obtained from PO1 homokaryon collection	http://neurosporacyc.broadinstitute.org/NC10/NEW-IMAGE?type=GENE&object=NCU08325
NCU01606.5	ATP synthase subunit 5	test	NORMAL	Vogels Medium N	Colot06	Test set growth phenotypes obtained from PO1 homokaryon collection	http://neurosporacyc.broadinstitute.org/NC10/NEW-IMAGE?type=GENE&object=NCU01606
NCU01550.5	adenylate kinase cytosolic	test	NORMAL	Vogels Medium N	Colot06	Test set growth phenotypes obtained from PO1 homokaryon collection	http://neurosporacyc.broadinstitute.org/NC10/NEW-IMAGE?type=GENE&object=NCU01550
NCU05454.5	glycerol-3-phosphate dehydrogenase	test	NORMAL	Vogels Medium N	Colot06	Test set growth phenotypes obtained from PO1 homokaryon collection	http://neurosporacyc.broadinstitute.org/NC10/NEW-IMAGE?type=GENE&object=NCU05454
NCU01816.5	alc-1	test	NORMAL	Vogels Medium N	Colot06	Test set growth phenotypes obtained from PO1 homokaryon collection	http://neurosporacyc.broadinstitute.org/NC10/NEW-IMAGE?type=GENE&object=NCU01816
NCU06532.5	pyr-1	test	NORMAL	Vogels Medium N	Colot06	Test set growth phenotypes obtained from PO1 homokaryon collection	http://neurosporacyc.broadinstitute.org/NC10/NEW-IMAGE?type=GENE&object=NCU06532
NCU04468.5	proline-specific permease	test	NORMAL	Vogels Medium N	Colot06	Test set growth phenotypes obtained from PO1 homokaryon collection	http://neurosporacyc.broadinstitute.org/NC10/NEW-IMAGE?type=GENE&object=NCU04468
NCU06559.5	3-hydroxyisobutyrate dehydrogenase	test	NORMAL	Vogels Medium N	Colot06	Test set growth phenotypes obtained from PO1 homokaryon collection	http://neurosporacyc.broadinstitute.org/NC10/NEW-IMAGE?type=GENE&object=NCU06559
NCU07820.5	pantothenate transporter	test	NORMAL	Vogels Medium N	Colot06	Test set growth phenotypes obtained from PO1 homokaryon collection	http://neurosporacyc.broadinstitute.org/NC10/NEW-IMAGE?type=GENE&object=NCU07820
NCU01553.5	coq-2	test	NORMAL	Vogels Medium N	Colot06	Test set growth phenotypes obtained from PO1 homokaryon collection	http://neurosporacyc.broadinstitute.org/NC10/NEW-IMAGE?type=GENE&object=NCU01553
NCU05169.5	cat-4	test	NORMAL	Vogels Medium N	Colot06	Test set growth phenotypes obtained from PO1 homokaryon collection	http://neurosporacyc.broadinstitute.org/NC10/NEW-IMAGE?type=GENE&object=NCU05169
NCU03963.5	nic-7	test	NORMAL	Vogels Medium N	Colot06	Test set growth phenotypes obtained from PO1 homokaryon collection	http://neurosporacyc.broadinstitute.org/NC10/NEW-IMAGE?type=GENE&object=NCU03963
NCU02969.5	alkaline ceramidase	test	NORMAL	Vogels Medium N	Colot06	Test set growth phenotypes obtained from PO1 homokaryon collection	http://neurosporacyc.broadinstitute.org/NC10/NEW-IMAGE?type=GENE&object=NCU02969
NCU10506.5	tgl-4	test	NORMAL	Vogels Medium N	Colot06	Test set growth phenotypes obtained from PO1 homokaryon collection	http://neurosporacyc.broadinstitute.org/NC10/NEW-IMAGE?type=GENE&object=NCU10506
NCU07550.5	triosephosphate isomerase	test	NORMAL	Vogels Medium N	Colot06	Test set growth phenotypes obtained from PO1 homokaryon collection	http://neurosporacyc.broadinstitute.org/NC10/NEW-IMAGE?type=GENE&object=NCU07550
NCU01399.5	short chain dehydrogenase/reductase family	test	NORMAL	Vogels Medium N	Colot06	Test set growth phenotypes obtained from PO1 homokaryon collection	http://neurosporacyc.broadinstitute.org/NC10/NEW-IMAGE?type=GENE&object=NCU01399
NCU05624.5	L-asparaginase	test	NORMAL	Vogels Medium N	Colot06	Test set growth phenotypes obtained from PO1 homokaryon collection	http://neurosporacyc.broadinstitute.org/NC10/NEW-IMAGE?type=GENE&object=NCU05624
NCU06871.5	do	test	NORMAL	Vogels Medium N	Colot06	Test set growth phenotypes obtained from PO1 homokaryon collection	http://neurosporacyc.broadinstitute.org/NC10/NEW-IMAGE?type=GENE&object=NCU06871
NCU04481.5	mitochondrial ATPase	test	NORMAL	Vogels Medium N	Colot06	Test set growth phenotypes obtained from PO1 homokaryon collection	http://neurosporacyc.broadinstitute.org/NC10/NEW-IMAGE?type=GENE&object=NCU04481
NCU05537.5	fumarylacetoacetase	test	NORMAL	Vogels Medium N	Colot06	Test set growth phenotypes obtained from PO1 homokaryon collection	http://neurosporacyc.broadinstitute.org/NC10/NEW-IMAGE?type=GENE&object=NCU05537
NCU00461.5	gdh-1	test	NORMAL	Vogels Medium N	Colot06	Test set growth phenotypes obtained from PO1 homokaryon collection	http://neurosporacyc.broadinstitute.org/NC10/NEW-IMAGE?type=GENE&object=NCU00461
NCU07281.5	gpi-1	test	NORMAL	Vogels Medium N	Colot06	Test set growth phenotypes obtained from PO1 homokaryon collection	http://neurosporacyc.broadinstitute.org/NC10/NEW-IMAGE?type=GENE&object=NCU07281
NCU00552.5	al-1	test	NORMAL	Vogels Medium N	Colot06	Test set growth phenotypes obtained from PO1 homokaryon collection	http://neurosporacyc.broadinstitute.org/NC10/NEW-IMAGE?type=GENE&object=NCU00552
NCU08441.5	non-ribosomal peptide synthetase	test	NORMAL	Vogels Medium N	Colot06	Test set growth phenotypes obtained from PO1 homokaryon collection	http://neurosporacyc.broadinstitute.org/NC10/NEW-IMAGE?type=GENE&object=NCU08441
NCU03350.5	xdh-1	test	NORMAL	Vogels Medium N	Colot06	Test set growth phenotypes obtained from PO1 homokaryon collection	http://neurosporacyc.broadinstitute.org/NC10/NEW-IMAGE?type=GENE&object=NCU03350
NCU09264.5	APAF1-interacting protein	test	NORMAL	Vogels Medium N	Colot06	Test set growth phenotypes obtained from PO1 homokaryon collection	http://neurosporacyc.broadinstitute.org/NC10/NEW-IMAGE?type=GENE&object=NCU09264
NCU06761.5	gsl-19	test	NORMAL	Vogels Medium N	Colot06	Test set growth phenotypes obtained from PO1 homokaryon collection	http://neurosporacyc.broadinstitute.org/NC10/NEW-IMAGE?type=GENE&object=NCU06761
NCU06619.5	mtr	test	NORMAL	Vogels Medium N	Colot06	Test set growth phenotypes obtained from PO1 homokaryon collection	http://neurosporacyc.broadinstitute.org/NC10/NEW-IMAGE?type=GENE&object=NCU06619
NCU07607.5	sugar transporter	test	NORMAL	Vogels Medium N	Colot06	Test set growth phenotypes obtained from PO1 homokaryon collection	http://neurosporacyc.broadinstitute.org/NC10/NEW-IMAGE?type=GENE&object=NCU07607
NCU04221.5	tre-2	test	NORMAL	Vogels Medium N	Colot06	Test set growth phenotypes obtained from PO1 homokaryon collection	http://neurosporacyc.broadinstitute.org/NC10/NEW-IMAGE?type=GENE&object=NCU04221
NCU01902.5	glucosamine 6-phosphate N-acetyltransferase	test	NORMAL	Vogels Medium N	Colot06	Test set growth phenotypes obtained from PO1 homokaryon collection	http://neurosporacyc.broadinstitute.org/NC10/NEW-IMAGE?type=GENE&object=NCU01902
NCU09909.5	urea active transporter	test	NORMAL	Vogels Medium N	Colot06	Test set growth phenotypes obtained from PO1 homokaryon collection	http://neurosporacyc.broadinstitute.org/NC10/NEW-IMAGE?type=GENE&object=NCU09909
NCU08516.5	aldose 1-epimerase	test	NORMAL	Vogels Medium N	Colot06	Test set growth phenotypes obtained from PO1 homokaryon collection	http://neurosporacyc.broadinstitute.org/NC10/NEW-IMAGE?type=GENE&object=NCU08516
NCU03176.5	conserved hypothetical protein	test	NORMAL	Vogels Medium N	Colot06	Test set growth phenotypes obtained from PO1 homokaryon collection	http://neurosporacyc.broadinstitute.org/NC10/NEW-IMAGE?type=GENE&object=NCU03176
NCU03779.5	dak-1	test	NORMAL	Vogels Medium N	Colot06	Test set growth phenotypes obtained from PO1 homokaryon collection	http://neurosporacyc.broadinstitute.org/NC10/NEW-IMAGE?type=GENE&object=NCU03779
NCU04401.5	fructose-bisphosphate aldolase	test	NORMAL	Vogels Medium N	Colot06	Test set growth phenotypes obtained from PO1 homokaryon collection	http://neurosporacyc.broadinstitute.org/NC10/NEW-IMAGE?type=GENE&object=NCU04401
NCU04754.5	ilv-6	test	NORMAL	Vogels Medium N	Colot06	Test set growth phenotypes obtained from PO1 homokaryon collection	http://neurosporacyc.broadinstitute.org/NC10/NEW-IMAGE?type=GENE&object=NCU04754
NCU03693.5	oxidoreductase	test	NORMAL	Vogels Medium N	Colot06	Test set growth phenotypes obtained from PO1 homokaryon collection	http://neurosporacyc.broadinstitute.org/NC10/NEW-IMAGE?type=GENE&object=NCU03693
NCU07413.5	cytosine deaminase	test	NORMAL	Vogels Medium N	Colot06	Test set growth phenotypes obtained from PO1 homokaryon collection	http://neurosporacyc.broadinstitute.org/NC10/NEW-IMAGE?type=GENE&object=NCU07413
NCU04380.5	acyl-CoA synthetase	test	NORMAL	Vogels Medium N	Colot06	Test set growth phenotypes obtained from PO1 homokaryon collection	http://neurosporacyc.broadinstitute.org/NC10/NEW-IMAGE?type=GENE&object=NCU04380
NCU05254.5	ribose-phosphate pyrophosphokinase	test	NORMAL	Vogels Medium N	Colot06	Test set growth phenotypes obtained from PO1 homokaryon collection	http://neurosporacyc.broadinstitute.org/NC10/NEW-IMAGE?type=GENE&object=NCU05254
NCU06024.5	qa-4	test	NORMAL	Vogels Medium N	Colot06	Test set growth phenotypes obtained from PO1 homokaryon collection	http://neurosporacyc.broadinstitute.org/NC10/NEW-IMAGE?type=GENE&object=NCU06024
NCU06700.5	alpha/beta hydrolase	test	NORMAL	Vogels Medium N	Colot06	Test set growth phenotypes obtained from PO1 homokaryon collection	http://neurosporacyc.broadinstitute.org/NC10/NEW-IMAGE?type=GENE&object=NCU06700
NCU02305.5	coq-1	test	NORMAL	Vogels Medium N	Colot06	Test set growth phenotypes obtained from PO1 homokaryon collection	http://neurosporacyc.broadinstitute.org/NC10/NEW-IMAGE?type=GENE&object=NCU02305
NCU10048.5	pan-2	test	NONE	Vogels Medium N	Perkins73,Case58,Case58,CASE64,Case57,Case60,Threlkeld69,Romero86,Threlkeld65	heterokaryon. 'The results indicate that all the pan-2 mutants are blocked in the same step in pantothenic acid biosynthesis the conversion of ketovaline to ketopantoic acid-since all mutants will grow on ketopantoic acid, pantoic acid, and pantothenic acid, but not on ketovaline.' Case and Giles, 1958 ([<a href="http://www.ncbi.nlm.nih.gov/pubmed/16590210">Case58</a>]). Requires pantothenic acid	http://neurosporacyc.broadinstitute.org/NC10/NEW-IMAGE?type=GENE&object=NCU10048
NCU04385.5	leu-2	test	NONE	Vogels Medium N	Regnery47,Regnery44,Smith62,Kuwana69,Gross63,Reichenbec78,Gross69,Mary89,Kidd84,GROSS62	heterokaryon. 'In all instances the results were consistent with the assumption of a single gene difference between leucineless and normal strains. When all eight spores germinated, four of the resulting strains grew in the absence of leucine and four did not.' Regnery, 1944 ([<a href="http://bioinformatics.leeds.ac.uk/~gen6ar/newgenelist/database.cgi?ref=1705">Regnery, 1944</a>]). Requires leuci…	http://neurosporacyc.broadinstitute.org/NC10/NEW-IMAGE?type=GENE&object=NCU04385
NCU04265.5	inv	test	NONE	Vogels Medium N	Sargent69,Caru89,Sargent69,Lee84	heterokaryon. 'Dry-weight growth tests (see below) established that this strain was unable to utilize sucrose and suggested that the strain lacked invertase activity' Sargent and Woodward, 1969 ([<a href="http://www.ncbi.nlm.nih.gov/pubmed/4975154">Sargent69</a>]). Unable to use sucrose as carbon source. Grows well on glucose or fructose and fairly well on casamino acids or yeast extract.	http://neurosporacyc.broadinstitute.org/NC10/NEW-IMAGE?type=GENE&object=NCU04265
NCU07156.5	his-6	test	NONE	Vogels Medium N	Schechtman87,Perkins73,Perkins69,Perkins87,Catcheside60,Webber60,Catcheside69	heterokaryon. Requires histidine	http://neurosporacyc.broadinstitute.org/NC10/NEW-IMAGE?type=GENE&object=NCU07156
NCU06360.5	his-5	test	NONE	Vogels Medium N	Catcheside69,Smith62,Catcheside60,Newmeyer70,Shiu99,Webber60,AHMED64	heterokaryon. his-5 complements. Requires histidine	http://neurosporacyc.broadinstitute.org/NC10/NEW-IMAGE?type=GENE&object=NCU06360
NCU06974.5	his-4	test	NONE	Vogels Medium N	Murray62,Perkins62,Haas52,Perkins63,AMES57,AMES57	heterokaryon. 395 Murray, N.E. and M. Glassey 1962. 1:15. A second 'leaky' histidine mutant in linkage group IV.. Requires histidine	http://neurosporacyc.broadinstitute.org/NC10/NEW-IMAGE?type=GENE&object=NCU06974
NCU03139.5	his-3	test	NONE	Vogels Medium N	Catcheside98,Kang90,Catcheside69,Catcheside73,Benson78,deSerres69,Haas52,AHMED64,Minson69,Creaser69,Case74,Webber60,Catcheside60,Angel70,Catcheside74,Catcheside65,Ahmed68,Webber67,WEBBER65,WEBBER65,Overton89,Dubins89,Aramayo95,Sachs90,Margolin97	heterokaryon. Requires histidine	http://neurosporacyc.broadinstitute.org/NC10/NEW-IMAGE?type=GENE&object=NCU03139
NCU09320.5	his-2	test	NONE	Vogels Medium N	Catcheside69,Perkins77,Metzenberg79,Haas52,AHMED64,Catcheside60,Catcheside71	heterokaryon. Requires histidine	http://neurosporacyc.broadinstitute.org/NC10/NEW-IMAGE?type=GENE&object=NCU09320
NCU10468.5	arg-4	test	NONE	Vogels Medium N	Srb44,Perkins62,Serna78,DEDEKEN63,Vogel65,McDougall65,Srb46	heterokaryon. http://authors.library.caltech.edu/6845/1/SRBjbc44.pdf In table I, they show arg-4 growth of 0.9 on minimal medium (mutant 21502) and growth of 39.6 when provided with arginine supplement. Requires ornithine, citrulline, or arginine	http://neurosporacyc.broadinstitute.org/NC10/NEW-IMAGE?type=GENE&object=NCU10468
NCU00843.5	ad-9	test	NONE	Vogels Medium N	Buchanan60,Johnson56,Perkins97,Perkins69	heterokaryon. Requires adenine or hypoxanthine.	http://neurosporacyc.broadinstitute.org/NC10/NEW-IMAGE?type=GENE&object=NCU00843
NCU02629.5	ad-5	test	NONE	Vogels Medium N	Bernstein61,Buchanan60,Giles57,Johnson56,MITCHELL46,Perkins69,Sabina79,Sabina80	heterokaryon. Requires adenine or hypoxanthine.	http://neurosporacyc.broadinstitute.org/NC10/NEW-IMAGE?type=GENE&object=NCU02629
NCU03194.5	ad-3B	test	NONE	Vogels Medium N	BARNETT63,deSerres57,deSerres56,deSerres63,deSerres64,deSerres66,deSerres69,deSerres,DE58,Fisher67,Griffiths70,Griffiths75,MITCHELL46,Newcombe73,Pendyala79,Pendyala75,Seale76,De56	heterokaryon. Table I, in Serres, STUDIES W I T H PURPLE ADENINE MUTANTS I N NEUROSPORA CRASSA. I. STRUCTURAL AND FUNCTIONAL COMPLEXITY I N THE AD-3 REGION'. Group B refers to ad-3B. [<a href="http://www.ncbi.nlm.nih.gov/pubmed/17247654">De56</a>]. Requires adenine or hypoxanthine. Purple pigment is secreted with low adenine supplement (e.g., 0.lmM), not with high (2mM).	http://neurosporacyc.broadinstitute.org/NC10/NEW-IMAGE?type=GENE&object=NCU03194
NCU03166.5	ad-3A	test	NONE	Vogels Medium N	Benson78,deSerres56,deSerres69,De71,deSerres89,deSerres,deSerres92,deSerres91,deSerres93,deSerres94,deSerres95,Fisher67,Delange81,Griffiths70,MITCHELL46,Ong78,Pendyala79,Pendyala75,deSerres60	heterokaryon. 'Table I, in Serres, STUDIES W I T H PURPLE ADENINE MUTANTS I N NEUROSPORA. Requires adenine or hypoxanthine. Pigment is secreted with low adenine supplement (e.g., 0.lmM), not with high (2mM).	http://neurosporacyc.broadinstitute.org/NC10/NEW-IMAGE?type=GENE&object=NCU03166
NCU00177.5	ad-2	test	NONE	Vogels Medium N	Ahmad68,Crawford67,MITCHELL46,Buchanan60,Marathe90	heterokaryon. Inaccessible references: Ahmad and Mirdha, 1968 ([<a href="http://bioinformatics.leeds.ac.uk/~gen6ar/newgenelist/database.cgi?ref=18">Ahmad68</a>]); Crawford, 1967 ([<a href="http://bioinformatics.leeds.ac.uk/~gen6ar/newgenelist/database.cgi?ref=426">Crawford67</a>]); Mitchell and Houlahan, 1946 ([<a href="http://www.ncbi.nlm.nih.gov/pubmed/20999484">MITCHELL46</a>]); Buchanan, 1960…	http://neurosporacyc.broadinstitute.org/NC10/NEW-IMAGE?type=GENE&object=NCU00177

## Sheet: Supplement rescue training set
Locus	Gene	TrainOrTest?	Growth?	Media	citations	comments	URL
NCU04230.5	acu-3	train	NORMAL	Vogels + acetate	Flavell68	Grows when acetate is supplemented with sucrose according to [<a href="http://www.ncbi.nlm.nih.gov/pubmed/5643047">Flavell & Fincham, 1968</a>]	http://neurosporacyc.broadinstitute.org/NC10/NEW-IMAGE?type=GENE&object=NCU04230
NCU06836.5	acu-5	train	NORMAL	Vogels + acetate	Flavell68	Grows when acetate is supplemented with sucrose according to [<a href="http://www.ncbi.nlm.nih.gov/pubmed/5643047">Flavell & Fincham, 1968</a>]	http://neurosporacyc.broadinstitute.org/NC10/NEW-IMAGE?type=GENE&object=NCU06836
NCU09873.5	acu-6	train	NORMAL	Vogels + acetate	Flavell68	Grows when acetate is supplemented with sucrose according to [<a href="http://www.ncbi.nlm.nih.gov/pubmed/5643047">Flavell & Fincham, 1968</a>]	http://neurosporacyc.broadinstitute.org/NC10/NEW-IMAGE?type=GENE&object=NCU09873
NCU00468.5	tyr-1	train	NORMAL	Vogels + L-tyrosine	Baker68	. no growth. [<a href="http://www.ncbi.nlm.nih.gov/pubmed/17248403">Baker, 1968</a>]	http://neurosporacyc.broadinstitute.org/NC10/NEW-IMAGE?type=GENE&object=NCU00468
NCU08409.5	trp-3	train	NORMAL	Vogels + L-tryptophan	Ahmad60	table 2 from [<a href="http://bioinformatics.leeds.ac.uk/~gen6ar/newgenelist/database.cgi?ref=11">Ahmad, 1960</a>]. Ahmad, M., and D. G. Catcheside. .	http://neurosporacyc.broadinstitute.org/NC10/NEW-IMAGE?type=GENE&object=NCU10283
NCU00200.5	trp-1	train	NORMAL	Vogels + L-tryptophan	Ahmad60	[<a href="http://bioinformatics.leeds.ac.uk/~gen6ar/newgenelist/database.cgi?ref=11">Ahmad, 1960</a>]. Ahmad, M., and D. G. Catcheside. .	http://neurosporacyc.broadinstitute.org/NC10/NEW-IMAGE?type=GENE&object=NCU00200
NCU00200.5	trp-1	train	NORMAL	Vogels + indole	Ahmad60	[<a href="http://bioinformatics.leeds.ac.uk/~gen6ar/newgenelist/database.cgi?ref=11">Ahmad, 1960</a>]. Ahmad, M., and D. G. Catcheside. .	http://neurosporacyc.broadinstitute.org/NC10/NEW-IMAGE?type=GENE&object=NCU00200
NCU03425.5	thr-2	train	NORMAL	Vogels + L-threonine	FLAVIN60	called a thr auxotroph in [<a href="http://www.ncbi.nlm.nih.gov/pubmed/13823379">FLAVIN & SLAUGHTER, 1960</a>]. Flavin, M., and C. Slaughter (1960); does not possess any enzyme (4.2.3.1) activity. .	http://neurosporacyc.broadinstitute.org/NC10/NEW-IMAGE?type=GENE&object=NCU03425
NCU08313.5	rib-2	train	NORMAL	Vogels + riboflavin	Garnjobst56	figs 1 & 2 from [<a href="http://bioinformatics.leeds.ac.uk/~gen6ar/newgenelist/database.cgi?ref=718">Garnjobst, 1956</a>]. Garnjobst, L., and E. L. Tatum. .	http://neurosporacyc.broadinstitute.org/NC10/NEW-IMAGE?type=GENE&object=NCU08313
NCU07725.5	pt	train	NORMAL	Vogels + L-phenylalanine,L-tyrosine	Colburn65	[<a href="http://bioinformatics.leeds.ac.uk/~gen6ar/newgenelist/database.cgi?ref=396">Colburn, 1965</a>]. Colburn, R. W., and E. L. Tatum (1965). .	http://neurosporacyc.broadinstitute.org/NC10/NEW-IMAGE?type=GENE&object=NCU07725
NCU06558.5	oxD	train	NORMAL	Vogels + sulfate	OHNISHI62	. no growth. Table 3, row 2, of Ohnishi et al. ([<a href="http://www.ncbi.nlm.nih.gov/pubmed/14481396">OHNISHI et al., 1962</a>])	http://neurosporacyc.broadinstitute.org/NC10/NEW-IMAGE?type=GENE&object=NCU06558
NCU05752.5	nt	train	NORMAL	Vogels + nicotinate	Gaertner81	. no growth. non-leaky & did not grow on Vogel's minimal according to http://www.fgsc.net/fgn/nn28/28gaertner.pdf	http://neurosporacyc.broadinstitute.org/NC10/NEW-IMAGE?type=GENE&object=NCU05752
NCU05298.5	nit-3	train	NORMAL	Vogels + hypoxanthine	Davis00	. no growth. [<a href="http://books.google.com/books?id=mLOMPN20MD8C&lpg=PP1&dq=neurospora%3A%20contributions%20of%20a%20model%20organism&pg=PP1#v=onepage&q&f=false">Davis, 2000</a>] p 113 Nitrate reductase is encoded by the nit-3 gene and mutants of this locus...are unable to use NO3 as a sole nitrogen source	http://neurosporacyc.broadinstitute.org/NC10/NEW-IMAGE?type=GENE&object=NCU05298
NCU05298.5	nit-3	train	NORMAL	Vogels + nitrite	Davis00	. no growth. [<a href="http://books.google.com/books?id=mLOMPN20MD8C&lpg=PP1&dq=neurospora%3A%20contributions%20of%20a%20model%20organism&pg=PP1#v=onepage&q&f=false">Davis, 2000</a>] p 113 Nitrate reductase is encoded by the nit-3 gene and mutants of this locus...are unable to use NO3 as a sole nitrogen source	http://neurosporacyc.broadinstitute.org/NC10/NEW-IMAGE?type=GENE&object=NCU05298
NCU05298.5	nit-3	train	NORMAL	Vogels + ammonia	Davis00	. no growth. [<a href="http://books.google.com/books?id=mLOMPN20MD8C&lpg=PP1&dq=neurospora%3A%20contributions%20of%20a%20model%20organism&pg=PP1#v=onepage&q&f=false">Davis, 2000</a>] p 113 Nitrate reductase is encoded by the nit-3 gene and mutants of this locus...are unable to use NO3 as a sole nitrogen source	http://neurosporacyc.broadinstitute.org/NC10/NEW-IMAGE?type=GENE&object=NCU05298
NCU06924.5	nic-3	train	NORMAL	Vogels + nicotinate	Yanofsky50	table 1 from [<a href="http://www.ncbi.nlm.nih.gov/pubmed/16588968">Yanofsky & Bonner, 1950</a>]. Yanofsky, C., and D. M. Bonner. .	http://neurosporacyc.broadinstitute.org/NC10/NEW-IMAGE?type=GENE&object=NCU06924
NCU06924.5	nic-3	train	NORMAL	Vogels + nicotinamide	Yanofsky50	table 1 from [<a href="http://www.ncbi.nlm.nih.gov/pubmed/16588968">Yanofsky & Bonner, 1950</a>]. Yanofsky, C., and D. M. Bonner. .	http://neurosporacyc.broadinstitute.org/NC10/NEW-IMAGE?type=GENE&object=NCU06924
NCU06924.5	nic-3	train	NORMAL	Vogels + 3-hydroxyanthranilate	Yanofsky50	table 1 from [<a href="http://www.ncbi.nlm.nih.gov/pubmed/16588968">Yanofsky & Bonner, 1950</a>]. Yanofsky, C., and D. M. Bonner. .	http://neurosporacyc.broadinstitute.org/NC10/NEW-IMAGE?type=GENE&object=NCU06924
NCU06924.5	nic-3	train	NORMAL	Vogels + 3-hydroxy-L-kynurenine	Yanofsky50	table 1 from [<a href="http://www.ncbi.nlm.nih.gov/pubmed/16588968">Yanofsky & Bonner, 1950</a>]. Yanofsky, C., and D. M. Bonner. .	http://neurosporacyc.broadinstitute.org/NC10/NEW-IMAGE?type=GENE&object=NCU06924
NCU03282.5	nic-2	train	NORMAL	Vogels + nicotinate	Yanofsky50	table 1 from [<a href="http://www.ncbi.nlm.nih.gov/pubmed/16588968">Yanofsky & Bonner, 1950</a>]. Yanofsky, C., and D. M. Bonner. .	http://neurosporacyc.broadinstitute.org/NC10/NEW-IMAGE?type=GENE&object=NCU03282
NCU03282.5	nic-2	train	NORMAL	Vogels + nicotinamide	Yanofsky50	table 1 from [<a href="http://www.ncbi.nlm.nih.gov/pubmed/16588968">Yanofsky & Bonner, 1950</a>]. Yanofsky, C., and D. M. Bonner. .	http://neurosporacyc.broadinstitute.org/NC10/NEW-IMAGE?type=GENE&object=NCU03282
NCU02998.5	nic-1	train	NORMAL	Vogels + nicotinate	Bonner49	table 1 from [<a href="http://bioinformatics.leeds.ac.uk/~gen6ar/newgenelist/database.cgi?ref=195">Bonner, 1949</a>]. Bonner, D. M., and C. Yanofsky. .	http://neurosporacyc.broadinstitute.org/NC10/NEW-IMAGE?type=GENE&object=NCU02998
NCU02998.5	nic-1	train	NORMAL	Vogels + nicotinamide	Bonner49	table 1 from [<a href="http://bioinformatics.leeds.ac.uk/~gen6ar/newgenelist/database.cgi?ref=195">Bonner, 1949</a>]. Bonner, D. M., and C. Yanofsky. .	http://neurosporacyc.broadinstitute.org/NC10/NEW-IMAGE?type=GENE&object=NCU02998
NCU06512.5	met-8	train	NORMAL	Vogels + L-methionine	Murray60	table 1 from [<a href="http://bioinformatics.leeds.ac.uk/~gen6ar/newgenelist/database.cgi?ref=1411">Murray, 1960</a>]. Murray, N. E.. .	http://neurosporacyc.broadinstitute.org/NC10/NEW-IMAGE?type=GENE&object=NCU06512
NCU02430.5	met-7	train	NORMAL	Vogels + L-homocysteine	Murray60	table 1 from [<a href="http://bioinformatics.leeds.ac.uk/~gen6ar/newgenelist/database.cgi?ref=1411">Murray, 1960</a>]. Murray, N. E.. .	http://neurosporacyc.broadinstitute.org/NC10/NEW-IMAGE?type=GENE&object=NCU02430
NCU02430.5	met-7	train	NORMAL	Vogels + L-methionine	Murray60	table 1 from [<a href="http://bioinformatics.leeds.ac.uk/~gen6ar/newgenelist/database.cgi?ref=1411">Murray, 1960</a>]. Murray, N. E.. .	http://neurosporacyc.broadinstitute.org/NC10/NEW-IMAGE?type=GENE&object=NCU02430
NCU02430.5	met-7	train	NORMAL	Vogels + L-cystathionine	Murray60	table 1 from [<a href="http://bioinformatics.leeds.ac.uk/~gen6ar/newgenelist/database.cgi?ref=1411">Murray, 1960</a>]. Murray, N. E.. .	http://neurosporacyc.broadinstitute.org/NC10/NEW-IMAGE?type=GENE&object=NCU02430
NCU00892.5	met-6	train	NORMAL	Vogels + L-methionine	Murray60	table 1 from [<a href="http://bioinformatics.leeds.ac.uk/~gen6ar/newgenelist/database.cgi?ref=1411">Murray, 1960</a>]. Murray, N. E.. .	http://neurosporacyc.broadinstitute.org/NC10/NEW-IMAGE?type=GENE&object=NCU00892
NCU07001.5	met-5	train	NORMAL	Vogels + L-homocysteine	Murray60	table 1 from [<a href="http://bioinformatics.leeds.ac.uk/~gen6ar/newgenelist/database.cgi?ref=1411">Murray, 1960</a>]. Murray, N. E.. .	http://neurosporacyc.broadinstitute.org/NC10/NEW-IMAGE?type=GENE&object=NCU07001
NCU07001.5	met-5	train	NORMAL	Vogels + L-methionine	Murray60	table 1 from [<a href="http://bioinformatics.leeds.ac.uk/~gen6ar/newgenelist/database.cgi?ref=1411">Murray, 1960</a>]. Murray, N. E.. .	http://neurosporacyc.broadinstitute.org/NC10/NEW-IMAGE?type=GENE&object=NCU07001
NCU07001.5	met-5	train	NORMAL	Vogels + L-cystathionine	Murray60	table 1 from [<a href="http://bioinformatics.leeds.ac.uk/~gen6ar/newgenelist/database.cgi?ref=1411">Murray, 1960</a>]. Murray, N. E.. .	http://neurosporacyc.broadinstitute.org/NC10/NEW-IMAGE?type=GENE&object=NCU07001
NCU07987.5	met-2	train	NORMAL	Vogels + L-homocysteine	Horowitz47	table 1 from [<a href="http://bioinformatics.leeds.ac.uk/~gen6ar/newgenelist/database.cgi?ref=893">Horowitz, 1947</a>]. Horowitz, N. H. (1947).. .	http://neurosporacyc.broadinstitute.org/NC10/NEW-IMAGE?type=GENE&object=NCU07987
NCU07987.5	met-2	train	NORMAL	Vogels + L-methionine	Horowitz47	table 1 from [<a href="http://bioinformatics.leeds.ac.uk/~gen6ar/newgenelist/database.cgi?ref=893">Horowitz, 1947</a>]. Horowitz, N. H. (1947).. .	http://neurosporacyc.broadinstitute.org/NC10/NEW-IMAGE?type=GENE&object=NCU07987
NCU05526.5	lys-5	train	NORMAL	Vogels + L-lysine	Hogg68,TRUPIN65	author statement of auxotrophy in [<a href="http://www.ncbi.nlm.nih.gov/pubmed/4296471">Hogg & Broquist, 1968</a>]. Hogg, R. W., and H. P. Broquist. no growth. Table 1. Trupin 1965 [<a href="http://www.ncbi.nlm.nih.gov/pubmed/14304863">TRUPIN & BROQUIST, 1965</a>]	http://neurosporacyc.broadinstitute.org/NC10/NEW-IMAGE?type=GENE&object=NCU05526
NCU03118.5	lys-4	train	NORMAL	Vogels + L-lysine	TRUPIN65	. no growth. Table 1. Trupin 1965 [<a href="http://www.ncbi.nlm.nih.gov/pubmed/14304863">TRUPIN & BROQUIST, 1965</a>]	http://neurosporacyc.broadinstitute.org/NC10/NEW-IMAGE?type=GENE&object=NCU03118
NCU03010.5	lys-3	train	NORMAL	Vogels + L-lysine	TRUPIN65	figure 1 from Doermann AH (1945) J. Biol. Chem. 160:95-103 (no pmid). no growth. Table 1. Trupin 1965 [<a href="http://www.ncbi.nlm.nih.gov/pubmed/14304863">TRUPIN & BROQUIST, 1965</a>]	http://neurosporacyc.broadinstitute.org/NC10/NEW-IMAGE?type=GENE&object=NCU03010
NCU03748.5	lys-2	train	NORMAL	Vogels + L-lysine	TRUPIN65	table 1 from [<a href="http://www.ncbi.nlm.nih.gov/pubmed/14304863">TRUPIN & BROQUIST, 1965</a>]. Trupin, J. S., and H. P. Broquist. .	http://neurosporacyc.broadinstitute.org/NC10/NEW-IMAGE?type=GENE&object=NCU03748
NCU06232.5	leu-1	train	NORMAL	Vogels + L-leucine	Regnery44	from [<a href="http://bioinformatics.leeds.ac.uk/~gen6ar/newgenelist/database.cgi?ref=1705">Regnery, 1944</a>]. Regnery, D. C. (1944). From crosses of leucineless (Strain 33757) and wild type strains, spores from 131 asci were isolated, their positions in the asci recorded, and cultures established from them on a medium containing leucine. Transfers of conidia were then made to a medium in which …	http://neurosporacyc.broadinstitute.org/NC10/NEW-IMAGE?type=GENE&object=NCU06232
NCU00554.5	hom-1	train	NORMAL	Vogels + L-homoserine	TEAS48	tables 1 & 3 from [<a href="http://www.ncbi.nlm.nih.gov/pubmed/18901184">TEAS et al., 1948</a>]. Teas, H. J., N. H. Horowitz, and M. Fling. .	http://neurosporacyc.broadinstitute.org/NC10/NEW-IMAGE?type=GENE&object=NCU00554
NCU00554.5	hom-1	train	NORMAL	Vogels + L-methionine,L-threonine	TEAS48	tables 1 & 3 from [<a href="http://www.ncbi.nlm.nih.gov/pubmed/18901184">TEAS et al., 1948</a>]. Teas, H. J., N. H. Horowitz, and M. Fling. .	http://neurosporacyc.broadinstitute.org/NC10/NEW-IMAGE?type=GENE&object=NCU00554
NCU06724.5	gln-1	train	NORMAL	Vogels + L-glutamine	Davila83	table 1 from [<a href="http://www.ncbi.nlm.nih.gov/pubmed/6139363">Davila et al., 1983</a>]. DÃ¡vila, G., F. Sanchez, R. Palacios, and J. Mora (1978).. .	http://neurosporacyc.broadinstitute.org/NC10/NEW-IMAGE?type=GENE&object=NCU06724
NCU08352.5	cys-9	train	NORMAL	Vogels + sulfite	LEINWEBER65,Murray65	. no growth. Murray, N. E. ([<a href="http://www.ncbi.nlm.nih.gov/pubmed/5826323">Murray, 1965</a>]), Leinweber [<a href="http://www.ncbi.nlm.nih.gov/pubmed/14275135">LEINWEBER & MONTY, 1965</a>] mutant UT-156 was identified as cys-9 by Murray	http://neurosporacyc.broadinstitute.org/NC10/NEW-IMAGE?type=GENE&object=NCU08352
NCU08352.5	cys-9	train	NORMAL	Vogels + L-methionine	LEINWEBER65,Murray65	. no growth. Murray, N. E. ([<a href="http://www.ncbi.nlm.nih.gov/pubmed/5826323">Murray, 1965</a>]), Leinweber [<a href="http://www.ncbi.nlm.nih.gov/pubmed/14275135">LEINWEBER & MONTY, 1965</a>] mutant UT-156 was identified as cys-9 by Murray	http://neurosporacyc.broadinstitute.org/NC10/NEW-IMAGE?type=GENE&object=NCU08352
NCU08352.5	cys-9	train	NORMAL	Vogels + thiosulfate	LEINWEBER65,Murray65	. no growth. Murray, N. E. ([<a href="http://www.ncbi.nlm.nih.gov/pubmed/5826323">Murray, 1965</a>]), Leinweber [<a href="http://www.ncbi.nlm.nih.gov/pubmed/14275135">LEINWEBER & MONTY, 1965</a>] mutant UT-156 was identified as cys-9 by Murray	http://neurosporacyc.broadinstitute.org/NC10/NEW-IMAGE?type=GENE&object=NCU08352
NCU08352.5	cys-9	train	NORMAL	Vogels + L-cysteine	LEINWEBER65,Murray65	. no growth. Murray, N. E. ([<a href="http://www.ncbi.nlm.nih.gov/pubmed/5826323">Murray, 1965</a>]), Leinweber [<a href="http://www.ncbi.nlm.nih.gov/pubmed/14275135">LEINWEBER & MONTY, 1965</a>] mutant UT-156 was identified as cys-9 by Murray	http://neurosporacyc.broadinstitute.org/NC10/NEW-IMAGE?type=GENE&object=NCU08352
NCU02005.5	cys-5	train	NORMAL	Vogels + sulfite	Murray65	table 1 from [<a href="http://www.ncbi.nlm.nih.gov/pubmed/5826323">Murray, 1965</a>]. Murray, N. E.. no growth. Murray, N. E. ([<a href="http://www.ncbi.nlm.nih.gov/pubmed/5826323">Murray, 1965</a>]), Phinney, 1948. Mutant 35001 is named cys-5 by Murray. Phinney states These strains cannot grow on a minimal medium containing sulfate as the sole source of sulfur.	http://neurosporacyc.broadinstitute.org/NC10/NEW-IMAGE?type=GENE&object=NCU02005
NCU02005.5	cys-5	train	NORMAL	Vogels + L-methionine	Murray65	table 1 from [<a href="http://www.ncbi.nlm.nih.gov/pubmed/5826323">Murray, 1965</a>]. Murray, N. E.. no growth. Murray, N. E. ([<a href="http://www.ncbi.nlm.nih.gov/pubmed/5826323">Murray, 1965</a>]), Phinney, 1948. Mutant 35001 is named cys-5 by Murray. Phinney states These strains cannot grow on a minimal medium containing sulfate as the sole source of sulfur.	http://neurosporacyc.broadinstitute.org/NC10/NEW-IMAGE?type=GENE&object=NCU02005
NCU02005.5	cys-5	train	NORMAL	Vogels + thiosulfate	Murray65	table 1 from [<a href="http://www.ncbi.nlm.nih.gov/pubmed/5826323">Murray, 1965</a>]. Murray, N. E.. no growth. Murray, N. E. ([<a href="http://www.ncbi.nlm.nih.gov/pubmed/5826323">Murray, 1965</a>]), Phinney, 1948. Mutant 35001 is named cys-5 by Murray. Phinney states These strains cannot grow on a minimal medium containing sulfate as the sole source of sulfur.	http://neurosporacyc.broadinstitute.org/NC10/NEW-IMAGE?type=GENE&object=NCU02005
NCU02005.5	cys-5	train	NORMAL	Vogels + L-cysteine	Murray65	table 1 from [<a href="http://www.ncbi.nlm.nih.gov/pubmed/5826323">Murray, 1965</a>]. Murray, N. E.. no growth. Murray, N. E. ([<a href="http://www.ncbi.nlm.nih.gov/pubmed/5826323">Murray, 1965</a>]), Phinney, 1948. Mutant 35001 is named cys-5 by Murray. Phinney states These strains cannot grow on a minimal medium containing sulfate as the sole source of sulfur.	http://neurosporacyc.broadinstitute.org/NC10/NEW-IMAGE?type=GENE&object=NCU02005
NCU05238.5	cys-4	train	NORMAL	Vogels + L-cysteine	Murray65	table 1 from [<a href="http://www.ncbi.nlm.nih.gov/pubmed/5826323">Murray, 1965</a>]. Murray, N. E.. .	http://neurosporacyc.broadinstitute.org/NC10/NEW-IMAGE?type=GENE&object=NCU05238
NCU01985.5	cys-11	train	NORMAL	Vogels + sulfite	Murray65	table 1 from [<a href="http://www.ncbi.nlm.nih.gov/pubmed/5826323">Murray, 1965</a>]. Murray, N. E.. .	http://neurosporacyc.broadinstitute.org/NC10/NEW-IMAGE?type=GENE&object=NCU01985
NCU01985.5	cys-11	train	NORMAL	Vogels + L-methionine	Murray65	table 1 from [<a href="http://www.ncbi.nlm.nih.gov/pubmed/5826323">Murray, 1965</a>]. Murray, N. E.. .	http://neurosporacyc.broadinstitute.org/NC10/NEW-IMAGE?type=GENE&object=NCU01985
NCU01985.5	cys-11	train	NORMAL	Vogels + thiosulfate	Murray65	table 1 from [<a href="http://www.ncbi.nlm.nih.gov/pubmed/5826323">Murray, 1965</a>]. Murray, N. E.. .	http://neurosporacyc.broadinstitute.org/NC10/NEW-IMAGE?type=GENE&object=NCU01985
NCU01985.5	cys-11	train	NORMAL	Vogels + L-cysteine	Murray65	table 1 from [<a href="http://www.ncbi.nlm.nih.gov/pubmed/5826323">Murray, 1965</a>]. Murray, N. E.. .	http://neurosporacyc.broadinstitute.org/NC10/NEW-IMAGE?type=GENE&object=NCU01985
NCU04303.5	asn-1	train	NORMAL	Vogels + L-asparagine	Tanenbaum54	figure 1 from [<a href="http://bioinformatics.leeds.ac.uk/~gen6ar/newgenelist/database.cgi?ref=2048">Tanenbaum, 1954</a>]. Tanenbaum, S. W., L. Garnjobst, and E. Tatum. . phenotype: 'Grows adaptively on minimal medium'	http://neurosporacyc.broadinstitute.org/NC10/NEW-IMAGE?type=GENE&object=NCU11671
NCU00567.5	arg-6	train	NORMAL	Vogels + L-citrulline	Davis79	table 2 from [<a href="http://www.ncbi.nlm.nih.gov/pubmed/161750">Davis, 1979</a>]. Davis, R. H. (1979).. .	http://neurosporacyc.broadinstitute.org/NC10/NEW-IMAGE?type=GENE&object=NCU00567
NCU00567.5	arg-6	train	NORMAL	Vogels + L-arginine	Davis79	table 2 from [<a href="http://www.ncbi.nlm.nih.gov/pubmed/161750">Davis, 1979</a>]. Davis, R. H. (1979).. .	http://neurosporacyc.broadinstitute.org/NC10/NEW-IMAGE?type=GENE&object=NCU00567
NCU00567.5	arg-6	train	NORMAL	Vogels + L-ornithine	Davis79	table 2 from [<a href="http://www.ncbi.nlm.nih.gov/pubmed/161750">Davis, 1979</a>]. Davis, R. H. (1979).. .	http://neurosporacyc.broadinstitute.org/NC10/NEW-IMAGE?type=GENE&object=NCU00567
NCU05410.5	arg-5	train	NORMAL	Vogels + L-citrulline	Davis79	table 2 from [<a href="http://www.ncbi.nlm.nih.gov/pubmed/161750">Davis, 1979</a>]. Davis, R. H. (1979).. .	http://neurosporacyc.broadinstitute.org/NC10/NEW-IMAGE?type=GENE&object=NCU05410
NCU05410.5	arg-5	train	NORMAL	Vogels + L-arginine	Davis79	table 2 from [<a href="http://www.ncbi.nlm.nih.gov/pubmed/161750">Davis, 1979</a>]. Davis, R. H. (1979).. .	http://neurosporacyc.broadinstitute.org/NC10/NEW-IMAGE?type=GENE&object=NCU05410
NCU05410.5	arg-5	train	NORMAL	Vogels + L-ornithine	Davis79	table 2 from [<a href="http://www.ncbi.nlm.nih.gov/pubmed/161750">Davis, 1979</a>]. Davis, R. H. (1979).. .	http://neurosporacyc.broadinstitute.org/NC10/NEW-IMAGE?type=GENE&object=NCU05410
NCU02677.5	arg-3	train	NORMAL	Vogels + L-citrulline	Davis79	table 2 from [<a href="http://www.ncbi.nlm.nih.gov/pubmed/161750">Davis, 1979</a>]. Davis, R. H. (1979).. .	http://neurosporacyc.broadinstitute.org/NC10/NEW-IMAGE?type=GENE&object=NCU02677
NCU02677.5	arg-3	train	NORMAL	Vogels + L-arginine	Davis79	table 2 from [<a href="http://www.ncbi.nlm.nih.gov/pubmed/161750">Davis, 1979</a>]. Davis, R. H. (1979).. .	http://neurosporacyc.broadinstitute.org/NC10/NEW-IMAGE?type=GENE&object=NCU02677
NCU07732.5	arg-2	train	NORMAL	Vogels + L-citrulline	Davis79	table 2 from [<a href="http://www.ncbi.nlm.nih.gov/pubmed/161750">Davis, 1979</a>]. Davis, R. H. (1979).. .	http://neurosporacyc.broadinstitute.org/NC10/NEW-IMAGE?type=GENE&object=NCU07732
NCU07732.5	arg-2	train	NORMAL	Vogels + L-arginine	Davis79	table 2 from [<a href="http://www.ncbi.nlm.nih.gov/pubmed/161750">Davis, 1979</a>]. Davis, R. H. (1979).. .	http://neurosporacyc.broadinstitute.org/NC10/NEW-IMAGE?type=GENE&object=NCU07732
NCU07682.5	arg-14	train	NORMAL	Vogels + L-citrulline	Davis79	table 2 from [<a href="http://www.ncbi.nlm.nih.gov/pubmed/161750">Davis, 1979</a>]. Davis, R. H. (1979).. .	http://neurosporacyc.broadinstitute.org/NC10/NEW-IMAGE?type=GENE&object=NCU07682
NCU07682.5	arg-14	train	NORMAL	Vogels + L-arginine	Davis79	table 2 from [<a href="http://www.ncbi.nlm.nih.gov/pubmed/161750">Davis, 1979</a>]. Davis, R. H. (1979).. .	http://neurosporacyc.broadinstitute.org/NC10/NEW-IMAGE?type=GENE&object=NCU07682
NCU07682.5	arg-14	train	NORMAL	Vogels + L-ornithine	Davis79	table 2 from [<a href="http://www.ncbi.nlm.nih.gov/pubmed/161750">Davis, 1979</a>]. Davis, R. H. (1979).. .	http://neurosporacyc.broadinstitute.org/NC10/NEW-IMAGE?type=GENE&object=NCU07682
NCU01667.5	arg-12	train	NORMAL	Vogels + L-citrulline	WOODWARD64	table 2 from [<a href="http://www.ncbi.nlm.nih.gov/pubmed/14158616">WOODWARD & SCHWARZ, 1964</a>]. Woodward, V. W., and P. Schwarz. .	http://neurosporacyc.broadinstitute.org/NC10/NEW-IMAGE?type=GENE&object=NCU01667
NCU01667.5	arg-12	train	NORMAL	Vogels + L-arginine	WOODWARD64	table 2 from [<a href="http://www.ncbi.nlm.nih.gov/pubmed/14158616">WOODWARD & SCHWARZ, 1964</a>]. Woodward, V. W., and P. Schwarz. .	http://neurosporacyc.broadinstitute.org/NC10/NEW-IMAGE?type=GENE&object=NCU01667
NCU08162.5	arg-10	train	NORMAL	Vogels + L-arginine	NEWMEYER57	[<a href="http://www.ncbi.nlm.nih.gov/pubmed/13416522">NEWMEYER, 1957</a>]. Newmeyer, D. (1957).. .	http://neurosporacyc.broadinstitute.org/NC10/NEW-IMAGE?type=GENE&object=NCU08162
NCU02639.5	arg-1	train	NORMAL	Vogels + L-arginine	Srb44	[<a href="http://bioinformatics.leeds.ac.uk/~gen6ar/newgenelist/database.cgi?ref=1968">Srb, 1944</a>]. Srb, A. M., and N. H. Horowitz. â€œStrain 36703 grows only in the presence of arginine.â€. .	http://neurosporacyc.broadinstitute.org/NC10/NEW-IMAGE?type=GENE&object=NCU02639
NCU09789.5	ad-8	train	NORMAL	Vogels + adenine	Giles57	[<a href="http://www.ncbi.nlm.nih.gov/pubmed/16578469">Giles et al., 1957</a>]. Giles, N. H., C. W. H. Partridge, and N. J. Nelson. .	http://neurosporacyc.broadinstitute.org/NC10/NEW-IMAGE?type=GENE&object=NCU09789
NCU06187.5	ad-4	train	NORMAL	Vogels + adenine	Giles57	[<a href="http://www.ncbi.nlm.nih.gov/pubmed/16578469">Giles et al., 1957</a>]. Giles, N. H., C. W. H. Partridge, and N. J. Nelson. .	http://neurosporacyc.broadinstitute.org/NC10/NEW-IMAGE?type=GENE&object=NCU06187
NCU06075.5	ace-8	train	NORMAL	Vogels + acetate	Kuwana83	. no growth. From Kuwana and Kubota, 1983 ([<a href="http://www.journalarchive.jst.go.jp/jnlpdf.php?cdjournal=ggs1921&cdvol=54&noissue=4&startpage=235&lang=en&from=jnltoc">Kuwana & Okumura, 1979</a>])	http://neurosporacyc.broadinstitute.org/NC10/NEW-IMAGE?type=GENE&object=NCU06075
NCU09111.5	ace-7	train	NORMAL	Vogels + acetate	Kuwana79	tables 1 & 2 from Kuwana, H., and R. Okumura ([<a href="http://bioinformatics.leeds.ac.uk/~gen6ar/newgenelist/database.cgi?ref=1122">Kuwana, 1979</a>])	http://neurosporacyc.broadinstitute.org/NC10/NEW-IMAGE?type=GENE&object=NCU09111
NCU07659.5	ace-2	train	NORMAL	Vogels + acetate	Kuwana79	tables 1 & 2 from Kuwana, H., and R. Okumura ([<a href="http://bioinformatics.leeds.ac.uk/~gen6ar/newgenelist/database.cgi?ref=1122">Kuwana, 1979</a>])	http://neurosporacyc.broadinstitute.org/NC10/NEW-IMAGE?type=GENE&object=NCU07659
NCU03004.5	ace-3	train	NORMAL	Vogels + acetate	Kuwana79	tables 1 & 2 from Kuwana, H., and R. Okumura ([<a href="http://bioinformatics.leeds.ac.uk/~gen6ar/newgenelist/database.cgi?ref=1122">Kuwana, 1979</a>])	http://neurosporacyc.broadinstitute.org/NC10/NEW-IMAGE?type=GENE&object=NCU03004
NCU06482.5	ace-4	train	NORMAL	Vogels + acetate	Kuwana79	tables 1 & 2 from Kuwana, H., and R. Okumura ([<a href="http://bioinformatics.leeds.ac.uk/~gen6ar/newgenelist/database.cgi?ref=1122">Kuwana, 1979</a>])	http://neurosporacyc.broadinstitute.org/NC10/NEW-IMAGE?type=GENE&object=NCU06482

## Sheet: Supplement rescue test set
Locus	Gene	TrainOrTest?	Growth?	Media	citations	comments	URL
NCU10048.5	pan-2	test	NORMAL	Vogels + (<i>R</i>)-pantothenate	Perkins73,Case58,Case58,CASE64,Case57,Case60,Threlkeld69,Romero86,Threlkeld65	Requires pantothenic acid	http://neurosporacyc.broadinstitute.org/NC10/NEW-IMAGE?type=GENE&object=NCU10048
NCU04385.5	leu-2	test	NORMAL	Vogels + L-leucine	Regnery47,Regnery44,Smith62,Kuwana69,Gross63,Reichenbec78,Gross69,Mary89,Kidd84,GROSS62	heterokaryon. Requires leucine	http://neurosporacyc.broadinstitute.org/NC10/NEW-IMAGE?type=GENE&object=NCU04385
NCU04265.5	inv	test	NORMAL	Vogels + &beta;-D-glucose	Sargent69,Caru89,Sargent69,Lee84	heterokaryon. Unable to use sucrose as carbon source. Grows well on glucose or fructose and fairly well on casamino acids or yeast extract.	http://neurosporacyc.broadinstitute.org/NC10/NEW-IMAGE?type=GENE&object=NCU04265
NCU04265.5	inv	test	NORMAL	Vogels + &beta;-D-fructofuranose	Sargent69,Caru89,Sargent69,Lee84	heterokaryon. Unable to use sucrose as carbon source. Grows well on glucose or fructose and fairly well on casamino acids or yeast extract.	http://neurosporacyc.broadinstitute.org/NC10/NEW-IMAGE?type=GENE&object=NCU04265
NCU07156.5	his-6	test	NORMAL	Vogels + L-histidine	Schechtman87,Perkins73,Perkins69,Perkins87,Catcheside60,Webber60,Catcheside69	heterokaryon. Requires histidine	http://neurosporacyc.broadinstitute.org/NC10/NEW-IMAGE?type=GENE&object=NCU07156
NCU06360.5	his-5	test	NORMAL	Vogels + L-histidine	Catcheside69,Smith62,Catcheside60,Newmeyer70,Shiu99,Webber60,AHMED64	heterokaryon. Requires histidine	http://neurosporacyc.broadinstitute.org/NC10/NEW-IMAGE?type=GENE&object=NCU06360
NCU06974.5	his-4	test	NORMAL	Vogels + L-histidine	Murray62,Perkins62,Haas52,Perkins63,AMES57,AMES57	heterokaryon. Requires histidine	http://neurosporacyc.broadinstitute.org/NC10/NEW-IMAGE?type=GENE&object=NCU06974
NCU03139.5	his-3	test	NORMAL	Vogels + L-histidine	Catcheside98,Kang90,Catcheside69,Catcheside73,Benson78,deSerres69,Haas52,AHMED64,Minson69,Creaser69,Case74,Webber60,Catcheside60,Angel70,Catcheside74,Catcheside65,Ahmed68,Webber67,WEBBER65,WEBBER65,Overton89,Dubins89,Aramayo95,Sachs90,Margolin97	heterokaryon. Requires histidine	http://neurosporacyc.broadinstitute.org/NC10/NEW-IMAGE?type=GENE&object=NCU03139
NCU09320.5	his-2	test	NORMAL	Vogels + L-histidine	Catcheside69,Perkins77,Metzenberg79,Haas52,AHMED64,Catcheside60,Catcheside71	heterokaryon. Requires histidine	http://neurosporacyc.broadinstitute.org/NC10/NEW-IMAGE?type=GENE&object=NCU09320
NCU10468.5	arg-4	test	NORMAL	Vogels + L-citrulline	Srb44,Perkins62,Serna78,DEDEKEN63,Vogel65,McDougall65,Srb46	heterokaryon. 'Requires ornithine, citrulline, or arginine'	http://neurosporacyc.broadinstitute.org/NC10/NEW-IMAGE?type=GENE&object=NCU10468
NCU10468.5	arg-4	test	NORMAL	Vogels + L-arginine	Srb44,Perkins62,Serna78,DEDEKEN63,Vogel65,McDougall65,Srb46	heterokaryon. 'Requires ornithine, citrulline, or arginine'	http://neurosporacyc.broadinstitute.org/NC10/NEW-IMAGE?type=GENE&object=NCU10468
NCU00843.5	ad-9	test	NORMAL	Vogels + hypoxanthine	Buchanan60,Johnson56,Perkins97,Perkins69	heterokaryon. Requires adenine or hypoxanthine.	http://neurosporacyc.broadinstitute.org/NC10/NEW-IMAGE?type=GENE&object=NCU00843
NCU00843.5	ad-9	test	NORMAL	Vogels + adenine	Buchanan60,Johnson56,Perkins97,Perkins69	heterokaryon. Requires adenine or hypoxanthine.	http://neurosporacyc.broadinstitute.org/NC10/NEW-IMAGE?type=GENE&object=NCU00843
NCU02629.5	ad-5	test	NORMAL	Vogels + hypoxanthine	Bernstein61,Buchanan60,Giles57,Johnson56,MITCHELL46,Perkins69,Sabina79,Sabina80	heterokaryon. Requires adenine or hypoxanthine.	http://neurosporacyc.broadinstitute.org/NC10/NEW-IMAGE?type=GENE&object=NCU02629
NCU02629.5	ad-5	test	NORMAL	Vogels + adenine	Bernstein61,Buchanan60,Giles57,Johnson56,MITCHELL46,Perkins69,Sabina79,Sabina80	heterokaryon. Requires adenine or hypoxanthine.	http://neurosporacyc.broadinstitute.org/NC10/NEW-IMAGE?type=GENE&object=NCU02629
NCU03194.5	ad-3B	test	NORMAL	Vogels + hypoxanthine	BARNETT63,deSerres57,deSerres56,deSerres63,deSerres64,deSerres66,deSerres69,deSerres,DE58,Fisher67,Griffiths70,Griffiths75,MITCHELL46,Newcombe73,Pendyala79,Pendyala75,Seale76	heterokaryon. 'Requires adenine or hypoxanthine. Purple pigment is secreted with low adenine supplement (e.g., 0.lmM), not with high (2mM).'	http://neurosporacyc.broadinstitute.org/NC10/NEW-IMAGE?type=GENE&object=NCU03194
NCU03194.5	ad-3B	test	NORMAL	Vogels + adenine	BARNETT63,deSerres57,deSerres56,deSerres63,deSerres64,deSerres66,deSerres69,deSerres,DE58,Fisher67,Griffiths70,Griffiths75,MITCHELL46,Newcombe73,Pendyala79,Pendyala75,Seale76	heterokaryon. 'Requires adenine or hypoxanthine. Purple pigment is secreted with low adenine supplement (e.g., 0.lmM), not with high (2mM).'	http://neurosporacyc.broadinstitute.org/NC10/NEW-IMAGE?type=GENE&object=NCU03194
NCU03166.5	ad-3A	test	NORMAL	Vogels + hypoxanthine	Benson78,deSerres56,deSerres69,De71,deSerres89,deSerres,deSerres92,deSerres91,deSerres93,deSerres94,deSerres95,Fisher67,Delange81,Griffiths70,MITCHELL46,Ong78,Pendyala79,Pendyala75,deSerres60	heterokaryon. 'Requires adenine or hypoxanthine. Pigment is secreted with low adenine supplement (e.g., 0.lmM), not with high (2mM).'	http://neurosporacyc.broadinstitute.org/NC10/NEW-IMAGE?type=GENE&object=NCU03166
NCU03166.5	ad-3A	test	NORMAL	Vogels + adenine	Benson78,deSerres56,deSerres69,De71,deSerres89,deSerres,deSerres92,deSerres91,deSerres93,deSerres94,deSerres95,Fisher67,Delange81,Griffiths70,MITCHELL46,Ong78,Pendyala79,Pendyala75,deSerres60	heterokaryon. 'Requires adenine or hypoxanthine. Pigment is secreted with low adenine supplement (e.g., 0.lmM), not with high (2mM).'	http://neurosporacyc.broadinstitute.org/NC10/NEW-IMAGE?type=GENE&object=NCU03166
NCU00177.5	ad-2	test	NORMAL	Vogels + hypoxanthine	Ahmad68,Crawford67,MITCHELL46,Buchanan60,Marathe90	heterokaryon. Requires adenine or hypoxanthine.	http://neurosporacyc.broadinstitute.org/NC10/NEW-IMAGE?type=GENE&object=NCU00177
NCU00177.5	ad-2	test	NORMAL	Vogels + adenine	Ahmad68,Crawford67,MITCHELL46,Buchanan60,Marathe90	heterokaryon. Requires adenine or hypoxanthine.	http://neurosporacyc.broadinstitute.org/NC10/NEW-IMAGE?type=GENE&object=NCU00177

## Sheet: Synthetic lethals
Locus1	Locus2	Gene1	Gene2	Lethal Media	Rescue Media	Citations (Pubmed IDs)	Comments
NCU03235	NCU004433	cys-13	cys-14	Vogels	Vogels + methionine	"5429722"	The double mutant cys-14; cys-13 cannot transport inorganic sulfate but grows on methionine; both single mutants are prototrophic.
NCU01744	NCU01195	am	en(am)-2	Vogels	Vogels + L-glutamate	"6152851"
NCU00194	NCU01412	pro-3	ota	Vogels	Vogels + L-proline	"2942539"
NCU07334	NCU06432	pyr-1	uc-5	Vogels+uracil	Vogels + uracil + uridine	"5344102" (Table 4)
NCU09564	NCU08325	pho-4	pho-5	Vogels		DAVIS00, pg 120, which refers to PMID: 7732001.

## Sheet: References
Reference	Citation	PMID	URL
Colot06	Colot HV, Park G, Turner GE, Ringelberg C, Crew CM, Litvinkova L, Weiss RL, Borkovich KA, Dunlap JC, "A high-throughput gene knockout procedure for Neurospora reveals functions for multiple transcription factors.", Proc Natl Acad Sci U S A 103(27);10352-7.	16801547
Dunlap07	Dunlap JC, Borkovich KA, Henn MR, Turner GE, Sachs MS, Glass NL, McCluskey K, Plamann M, Galagan JE, Birren BW, Weiss RL, Townsend JP, Loros JJ, Nelson MA, Lambreghts R, Colot HV, Park G, Collopy P, Ringelberg C, Crew C, Litvinkova L, DeCaprio D, Hood HM, Curilla S, Shi M, Crawford M, Koerhsen M, Montgomery P, Larson L, Pearson M, Kasuga T, Tian C, Basturkmen M, Altamirano L, Xu J, "Enabling a co…	17352902
De56	De Serres FJ, "Studies with Purple Adenine Mutants in Neurospora Crassa. I. Structural and Functional Complexity in the Ad-3 Region.", Genetics 41(5);668-76.	17247654
Case58	Case ME, Giles NH, "EVIDENCE FROM TETRAD ANALYSIS FOR BOTH NORMAL AND ABERRANT RECOMBINATION BETWEEN ALLELIC MUTANTS IN Neurospora Crassa.", Proc Natl Acad Sci U S A 44(5);378-90.	16590210
Case58	Case, et al., "Recombination mechanisms at the <i>pan-2</i> locus in <i>Neurospora crassa</i>.", Cold Spring Harbor Symp. Quant. Biol. 23.		http://bioinformatics.leeds.ac.uk/~gen6ar/newgenelist/database.cgi?ref=300
CASE64	CASE ME, GILES NH, "ALLELIC RECOMBINATION IN NEUROSPORA: TETRAD ANALYSIS OF A THREE-POINT CROSS WITHIN THE PAN-2 LOCUS.", Genetics 49;529-40.	14135412
Case57	Case, et al., "A genetic study of pantothenic acid mutants in <i>Neurospora crassa</i>.", Ph.D. Yale University, New Haven, CT..		http://bioinformatics.leeds.ac.uk/~gen6ar/newgenelist/database.cgi?ref=296
Case60	Case ME, Giles NH, "COMPARATIVE COMPLEMENTATION AND GENETIC MAPS OF THE PAN-2 LOCUS IN NEUROSPORA CRASSA.", Proc Natl Acad Sci U S A 46(5);659-76.	16590655
Threlkeld69	Threlkeld SF, Newcombe K, Mylyk OM, "Non-reciprocal recombination at the pan-2 locus in Neurospora crassa.", Can J Genet Cytol 11(1);54-9.	5797808
Romero86	Romero D, Davila G, "Genetic and biochemical identification of the glutamate synthase structural gene in Neurospora crassa.", J Bacteriol 167(3);1043-7.	2943726
Threlkeld65	Threlkeld, et al., "Pantothenic acid requirement for spore color in <I>Neurospora crassa</I>.", Can. J. Genet. Cytol. 7.		http://bioinformatics.leeds.ac.uk/~gen6ar/newgenelist/database.cgi?ref=2086
Regnery47	Regnery, et al., "A study of the leucineless mutants of <I>Neurospora crassa</I>", Ph.D. California Institute of Technology, Pasadena, CA.		http://bioinformatics.leeds.ac.uk/~gen6ar/newgenelist/database.cgi?ref=1706
Kuwana69	Kuwana H, Wagner RP, "The iv-3 mutants of Neurospora crassa. I. Genetic and biochemical characteristics.", Genetics 62(3);479-85.	5384480
Gross63	Gross, et al., "Some aspects of interallelic complementation involving leucine biosynthetic enzymes of Neurospora.", Cold Spring Harbor Symp. Quant. Biol. 28.		http://bioinformatics.leeds.ac.uk/~gen6ar/newgenelist/database.cgi?ref=804
Reichenbec78	Reichenbecher VE, Gross SR, "Structural features of normal and complemented forms of the Neurospora isopropylmalate isomerase.", J Bacteriol 133(2);802-10.	146703
Gross69	Gross, et al., "Genetic regulatory mechanisms in the fungi.", Annu. Rev. Genet. 3.		http://bioinformatics.leeds.ac.uk/~gen6ar/newgenelist/database.cgi?ref=799
Mary89	Mary A, Kidd GL, Gross SR, "The response time of transcription and translation of the leu-2 gene of Neurospora to its inducer, alpha-isopropylmalate, approaches the permissible minimum.", Biochem Biophys Res Commun 161(3);1286-90.	2525903
Kidd84	Kidd GL, Gross SR, "Specific regulatory interconnection between the leucine and histidine pathways of Neurospora crassa.", J Bacteriol 158(1);121-7.	6325383
GROSS62	GROSS SR, "On the mechanism of complementation at the LEU-2 locus of Neurospora.", Proc Natl Acad Sci U S A 48;922-30.	13902256
Sargent69	Sargent ML, Woodward DO, "Gene-enzyme relationships in Neurospora invertase.", J Bacteriol 97(2);867-72.	4975154
Caru89	Caru M, Cifuentes V, Pincheira G, Jimenez A, "Molecular cloning and expression in Saccharomyces cerevisiae and Neurospora crassa of the invertase gene from Neurospora crassa.", J Appl Bacteriol 67(4);401-10.	2531138
Sargent69	Sargent ML, Woodward DO, "Genetic determinants of circadian rhythmicity in Neurospora.", J Bacteriol 97(2);861-6.	5773032
Lee84	Lee DB, Free SJ, "Isolation and characterization of Neurospora mutants affected in invertase synthesis.", Genetics 106(4);591-9.	6232169
Schechtman87	Schechtman MG, "Isolation of telomere DNA from Neurospora crassa.", Mol Cell Biol 7(9);3168-77.	2890097
Perkins73	Perkins, et al., "New markers and linkage data.", Neurospora Newsl 20.		http://bioinformatics.leeds.ac.uk/~gen6ar/newgenelist/database.cgi?ref=1603
Perkins87	Perkins, et al., "Newly mapped chromosomal loci of <i>Neurospora crassa</i>", Fungal Genetics Newsl 34.		http://bioinformatics.leeds.ac.uk/~gen6ar/newgenelist/database.cgi?ref=1593
Smith62	Smith, et al., "Linkage data for group IV", Neurospora Newsl. 1.		http://bioinformatics.leeds.ac.uk/~gen6ar/newgenelist/database.cgi?ref=1928
Newmeyer70	Newmeyer D, "A suppressor of the heterokaryon-incompatibility associated with mating type in Neurospora crassa.", Can J Genet Cytol 12(4);914-26.	5512565
Shiu99	Shiu PK, Glass NL, "Molecular characterization of tol, a mediator of mating-type-associated vegetative incompatibility in Neurospora crassa.", Genetics 151(2);545-55.	9927450
Murray62	Murray, et al., "A second leaky histidine mutant in linkage group IV. Neurospora", Neurospora Newsl 1.		http://bioinformatics.leeds.ac.uk/~gen6ar/newgenelist/database.cgi?ref=1412
Perkins63	Perkins, et al., "New markers and linkage data", Neurospora Newsl 4.		http://bioinformatics.leeds.ac.uk/~gen6ar/newgenelist/database.cgi?ref=1591
AMES57	AMES BN, "The biosynthesis of histidine; D-erythro-imidazoleglycerol phosphate dehydrase.", J Biol Chem 228(1);131-43.	13475302
AMES57	AMES BN, "The biosynthesis of histidine; L-histidinol phosphate phosphatase.", J Biol Chem 226(2);583-93.	13438843
Catcheside98	Catcheside, et al., "Direct database submission", .		http://bioinformatics.leeds.ac.uk/~gen6ar/newgenelist/database.cgi?ref=328
Kang90	Kang S, Metzenberg RL, "Molecular analysis of nuc-1+, a gene controlling phosphorus acquisition in Neurospora crassa.", Mol Cell Biol 10(11);5839-48.	2146493
Catcheside73	Catcheside DG, Corcoran D, "Control of non-allelic recombination in Neurospora crassa.", Aust J Biol Sci 26(6);1337-53.	4273091
Minson69	Minson AC, Creaser EH, "Purification of a trifunctional enzyme, catalysing three steps of the histidine pathway, from Neurospora crassa.", Biochem J 114(1);49-56.	4309307
Creaser69	Creaser, et al., "Proteins immunologically related to Neurospora histidinol dehydrogenase.", J. Gen. Microbiol. <B>55</B>.		http://bioinformatics.leeds.ac.uk/~gen6ar/newgenelist/database.cgi?ref=428
Case74	Case ME, Giles NH, "Revertants and secondary arom-2 mutants induced in non-complementing mutants in the arom gene cluster of Neurospora crassa.", Genetics 77(4);613-26.	4371577
Webber60	Webber BB, Case ME, "Genetical and Biochemical Studies of Histidine-Requiring Mutants of Neurospora Crassa. I. Classification of Mutants and Characterization of Mutant Groups.", Genetics 45(12);1605-15.	17248024
Angel70	Angel T, Austin B, Catcheside DG, "Regulation of recombination at the his-3 locus in Neurospora crassa.", Aust J Biol Sci 23(6);1229-40.	5496221
Catcheside74	Catcheside DG, Angel T, "A histidine-3 mutant, in Neurospora crassa, due to an interchange.", Aust J Biol Sci 27(2);219-29.	4277978
Catcheside65	Catcheside, et al., "Multiple enzymic functions of a gene in <I>Neurospora crassa</I>", Biochem. Biophys. Res. Commun. 18.		http://bioinformatics.leeds.ac.uk/~gen6ar/newgenelist/database.cgi?ref=331
Ahmed68	Ahmed A, "Organization of the histidine-3 region of Neurospora.", Mol Gen Genet 103(2);185-93.	4306011
Webber67	Webber, et al., "Relation between complementation pattern and genetic alteration in <I>his-3</I> mutants of <I>Neurospora</I>", Genetics 56.		http://bioinformatics.leeds.ac.uk/~gen6ar/newgenelist/database.cgi?ref=2197
WEBBER65	WEBBER BB, "GENETICAL AND BIOCHEMICAL STUDIES OF HISTIDINE-REQUIRING MUTANTS OF NEUROSPORA CRASSA. 3. CORRESPONDENCE BETWEEN BIOCHEMICAL CHARACTERISTICS AND COMPLEMENTATION MAP POSITION OF HIST-3 MUTANTS.", Genetics 51;263-73.	14292154
WEBBER65	WEBBER BB, "GENETICAL AND BIOCHEMICAL STUDIES OF HISTIDINE-REQUIRING MUTANTS OF NEUROSPORA CRASSA. IV. LINKAGE RELATIONSHIPS OF HIST-3 MUTANTS.", Genetics 51;275-83.	14292155
Overton89	Overton LK, Dubins JS, de Serres FJ, "Molecular and classical genetic analyses of his-3 mutants of Neurospora crassa. I. Tests for allelic complementation and specific revertibility.", Mutat Res 214(2);267-83.	2529437
Dubins89	Dubins JS, Overton LK, Cobb RR, de Serres FJ, "Classical and molecular genetic analyses of his-3 mutants of Neurospora crassa. II. Southern blot analyses and molecular mechanisms of mutagenicity.", Mutat Res 215(1);39-47.	2530448
Aramayo95	Aramayo, et al., "Gene replacements at the <i>his-3</i> locus of <i>Neurospora crassa</i>.", Fungal Genet. Newsl. .		http://bioinformatics.leeds.ac.uk/~gen6ar/newgenelist/database.cgi?ref=47
Sachs90	Sachs, et al., "The use of lacZ gene fusions in <I> Neurospora crassa </I>", Fungal Genet. Newsl. 37.		http://bioinformatics.leeds.ac.uk/~gen6ar/newgenelist/database.cgi?ref=1771
Margolin97	Margolin, et al., "Improved plasmids for gene targeting at the <i>his-3</i> locus of <i>Neurospora crassa</i> by electroporation.", Fungal Genet. Newsl. 44.		http://bioinformatics.leeds.ac.uk/~gen6ar/newgenelist/database.cgi?ref=1265
Catcheside69	Catcheside DG, Austin B, "The control of allelic recombination at histidine loci in Neurospora crassa.", Am J Bot 56(7);685-90.	5799350
Perkins77	Perkins DD, Barry EG, "The cytogenetics of Neurospora.", Adv Genet 19;133-285.	327765
Metzenberg79	Metzenberg RL, Chia W, "Genetic control of phosphorus assimilation in Neurospora crassa: dose-dependent dominance and recessiveness in constitutive mutants.", Genetics 93(3);625-43.	161751
Haas52	Haas F, Mitchell MB, Ames BN, Mitchell HK, "A Series of Histidineless Mutants of Neurospora Crassa.", Genetics 37(3);217-26.	17247387
AHMED64	AHMED A, CASE ME, GILES NH, "THE NATURE OF COMPLEMENTATION AMONG MUTANTS IN THE HISTIDINE-3 REGION OF NEUROSPORA CRASSA.", Brookhaven Symp Biol 17;53-65.	14246266
Catcheside60	Catcheside, et al., "Complementation among histidine mutants of <I>Neurospora crassa</I>", Proc. R. Soc. Lon. B, Biol. Sci. 153.		http://bioinformatics.leeds.ac.uk/~gen6ar/newgenelist/database.cgi?ref=329
Catcheside71	Catcheside DG, Austin B, "Common regulation of recombination at the amination-1 and histidine-2 loci in Neurospora crassa.", Aust J Biol Sci 24(1);107-15.	5553663
Perkins62	Perkins, et al., "New data on markers and rearrangements in <i>Neurospora</i>", Can. J. Genet. Cytol. 4.		http://bioinformatics.leeds.ac.uk/~gen6ar/newgenelist/database.cgi?ref=1585
Serna78	Serna L, Stadler D, "Nuclear division cycle in germinating conidia of Neurospora crassa.", J Bacteriol 136(1);341-51.	152308
DEDEKEN63	DEDEKEN RH, "[BIOSYNTHESIS OF ARGININE IN YEAST. I. THE FATE OF N-ALPHA-ACETYLORNITHINE].", Biochim Biophys Acta 78;606-16.	14089441
Vogel65	Vogel, et al., "Repression of ornithine-glutamate transacetylase in Neurospora", Genetics 482.		http://bioinformatics.leeds.ac.uk/~gen6ar/newgenelist/database.cgi?ref=2166
McDougall65	McDougall KJ, Woodward VW, "Suppression of arginine and pyrimidine-requiring mutants of Neurospora crassa.", Genetics 52(2);397-406.	5861568
Srb46	Srb, et al., "Ornithine-arginine metabolism in <I>Neurospora</I> and its genetic control", Ph D thesis, Stanford University.		http://bioinformatics.leeds.ac.uk/~gen6ar/newgenelist/database.cgi?ref=1963
Perkins97	Perkins DD, "Chromosome rearrangements in Neurospora and other filamentous fungi.", Adv Genet 36;239-398.	9348657
Bernstein61	Bernstein, et al., "Imidazole compounds accumulated by purine mutants of <i>Neurospora crassa.</i>", J. Gen. Microbiol <b>25</b>.		http://bioinformatics.leeds.ac.uk/~gen6ar/newgenelist/database.cgi?ref=160
Johnson56	Johnson, et al., "Genetic studies of adenineless mutants in <I>Neurospora crassa</I>", Microb. Genet. Bull. 13.		http://bioinformatics.leeds.ac.uk/~gen6ar/newgenelist/database.cgi?ref=997
Perkins69	Perkins, et al., "New markers and map sequences in <i>Neurospora crassa</i>, with a description of mapping by duplication coverage and of multiple translocation tocks for testing linkage", Genetica (The Hague) 40.		http://bioinformatics.leeds.ac.uk/~gen6ar/newgenelist/database.cgi?ref=1592
Sabina79	Sabina, et al., "Regulation of nucleotide metabolism during conidial germination in <I> Neurospora crassa </I>", Ph.D. Texas A and M; University, College Station, TX..		http://bioinformatics.leeds.ac.uk/~gen6ar/newgenelist/database.cgi?ref=1763
Sabina80	Sabina, et al., "Identification of the biochemical blocks in the ad-1 and ad-5 strains of <I> Neurospora crassa </I>", Genetics 94.		http://bioinformatics.leeds.ac.uk/~gen6ar/newgenelist/database.cgi?ref=1764
BARNETT63	BARNETT WE, DE SERRES FJ, "Fixed genetic instability in Neurospora crassa.", Genetics 48;717-23.	13969399
deSerres57	de Serres, et al., "A genetic analysis of an insertional translocation involving the <I>ad-3</I> region in <I>Neurospora crassa</I>.", Genetics <B>42</B>.		http://bioinformatics.leeds.ac.uk/~gen6ar/newgenelist/database.cgi?ref=485
deSerres63	de Serres, et al., "Studies with purple adenine mutants in Neurospora crassa. V. Evidence for allelic complementation among <I>ad-3</I>B mutants.", Genetics <B>48</B>.		http://bioinformatics.leeds.ac.uk/~gen6ar/newgenelist/database.cgi?ref=489
deSerres64	de Serres, et al., "Mutagenesis and chromosome structure.", J. Cell. Comp. Physiol.(Suppl. 1) <B>64</B>.		http://bioinformatics.leeds.ac.uk/~gen6ar/newgenelist/database.cgi?ref=490
deSerres66	de Serres, et al., "Carbon dioxide stimulation of the <I>ad-3</I> mutants of <I>Neurospora crassa</I>.", Mutat. Res. <B>3</B>.		http://bioinformatics.leeds.ac.uk/~gen6ar/newgenelist/database.cgi?ref=491
deSerres	de Serres JF, Brockman HE, Barnett WE, Kolmark HG, "Allelic complementation among nitrous acid-induced ad-3B mutants of Neurospora crassa.", Mutat Res 4(4);415-24.	6059023
DE58	DE SERRES FJ, KOLMARK HG, "A direct method for determination of forward-mutation rates in Neurospora crassa.", Nature 182(4644);1249-50.	13590301
Griffiths75	Griffiths AJ, "Growth patterns of adenine-3B; supersuppressor strains of Neurospora crassa.", Can J Genet Cytol 17(2);227-40.	126794
Newcombe73	Newcombe KD, Griffiths AJ, "The suppression of AD-3B mutants by supersuppressors in Neurospora crassa.", Genetics 75(4);615-22.	4360386
Seale76	Seale TW, "Super suppressor action spectrum in Neurospora.", Mol Gen Genet 148(1);105-8.	136592
Benson78	Benson EW, Howe HB, "Reversion and interallelic complementation at four urease loci in Neurospora crassa.", Mol Gen Genet 165(3);277-82.	154055
deSerres56	de Serres, et al., "Studies with purple adenine mutants in <I>Neurospora crassa</I>. I. Structural and functional complexity in the <I>ad-3</I> region.", Genetics <B>41</B>.		http://bioinformatics.leeds.ac.uk/~gen6ar/newgenelist/database.cgi?ref=487
deSerres69	de Serres, et al., "Comparison of the complementation and genetic maps of closely linked nonallelic markers on linkage group I of <I>Neurospora crassa</I>.", Mutat. Res. <B>8</B>.		http://bioinformatics.leeds.ac.uk/~gen6ar/newgenelist/database.cgi?ref=492
De71	De Serres FJ, "Studies with purple adenine mutants in Neurospora crassa. VI. The effects of differences in genetic background on ad-3A x ad-3B crosses.", Genetics 68(3);383-400.	5127402
deSerres89	de Serres FJ, "X-ray-induced specific-locus mutations in the ad-3 region of two-component heterokaryons of Neurospora crassa. II. More extensive genetic tests reveal an unexpectedly high frequency of multiple-locus mutations.", Mutat Res 210(2);281-90.	2521371
deSerres	de Serres FJ, "Utilization of the specific-locus assay in the ad-3 region of two-component heterokaryons of Neurospora for risk assessment of environmental chemicals.", Mutat Res 250(1-2);251-74.	1834935
deSerres92	de Serres FJ, "Development of a specific-locus assay in the ad-3 region of two-component heterokaryons of Neurospora: a review.", Environ Mol Mutagen 20(4);225-45.	1425606
deSerres91	de Serres FJ, Brockman HE, "Qualitative differences in the spectra of genetic damage in 2-aminopurine-induced ad-3 mutants between nucleotide excision-repair-proficient and -deficient strains of Neurospora crassa.", Mutat Res 251(1);41-58.	1834936
deSerres93	de Serres FJ, Brockman HE, "Comparison of the spectra of genetic damage in N4-hydroxycytidine-induced ad-3 mutations between nucleotide excision repair-proficient and -deficient heterokaryons of Neurospora crassa.", Mutat Res 285(2);145-63.	7678887
deSerres94	de Serres FJ, Malling HV, "Forward-mutation tests on the antitumor agent ICR-170 in Neurospora crassa demonstrate that it induces gene/point mutations in the ad-3 region and an exceptionally high frequency of multiple-locus ad-3 mutations with closely linked sites of recessive lethal damage.", Mutat Res 310(1);15-36.	7523879
deSerres95	de Serres FJ, Malling HV, Webber BB, Brockman HE, "Quantitative and qualitative aspects of spontaneous specific-locus mutation in the ad-3 region of heterokaryon 12 of Neurospora crassa.", Mutat Res 332(1-2);45-54.	7500991
Fisher67	Fisher CR, "Actinomycin D-induced phenotypic reversion in Neurospora crassa.", Genetics 57(1);189-94.	6077527
Delange81	Delange AM, "The mutation SK(ad-3A) cancels the dominance of ad-3A+ over ad-3A in the ascus of Neurospora.", Genetics 97(2);237-46.	6456169
Griffiths70	Griffiths AJ, "Topography of the ad-3 region of Neurospora crassa.", Can J Genet Cytol 12(3);420-4.	5516678
Ong78	Ong TM, "Use of the spot, plate and suspension test systems for the detection of the mutagenicity of environmental agents and chemical carcinogens in Neurospora crassa.", Mutat Res 53(3);297-308.	149924
Pendyala79	Pendyala L, Smyth J, Wellman AM, "Nature of 6-methylpurine inhibition and characterization of two 6-methylpurine-resistant mutants of Neurospora crassa.", J Bacteriol 137(1);248-55.	153898
Pendyala75	Pendyala L, Wellman AM, "Effect of histidine on purine nucleotide synthesis and utilization in Neurospora crassa.", J Bacteriol 124(1);78-85.	126229
deSerres60	de Serres FJ, "Studies with Purple Adenine Mutants in Neurospora Crassa. IV. Lack of Complementation between Different Ad-3a Mutants in Heterokaryons and Pseudowild Types.", Genetics 45(5);555-66.	17247943
Ahmad68	Ahmad, et al., "Linkage data for four linkage group III markers in <i>Neurospora crassa</i>.", Neurospora Newsl. 13.		http://bioinformatics.leeds.ac.uk/~gen6ar/newgenelist/database.cgi?ref=18
Crawford67	Crawford, et al., "New data on linkage group III markers in <I>Neurospora crassa</I>.", Aust. J. Biol. Sci. <B>20</B>.		http://bioinformatics.leeds.ac.uk/~gen6ar/newgenelist/database.cgi?ref=426
MITCHELL46	MITCHELL HK, HOULAHAN MB, "Adenine-requiring mutants of Neurospora crassa.", Fed Proc 5;370-5.	20999484
Buchanan60	Buchanan, et al., "The enzymatic synthesis of the purine nucleotides.", Harvey Lect. 54(1958-1959).		http://bioinformatics.leeds.ac.uk/~gen6ar/newgenelist/database.cgi?ref=249
Marathe90	Marathe S, Connerton IF, Fincham JR, "Duplication-induced mutation of a new Neurospora gene required for acetate utilization: properties of the mutant and predicted amino acid sequence of the protein product.", Mol Cell Biol 10(6);2638-44.	2140429
Hogg68	Hogg RW, Broquist HP, "Homocitrate formation in Neurospora crassa. Relation to lysine biosynthesis.", J Biol Chem 243(8);1839-45.	4296471
Flavell68	Flavell RB, Fincham JR, "Acetate-onutilizing mutants of Neurospora crassa. I. Mutant isolation, complementation studies, and linkage relationships.", J Bacteriol 95(3);1056-62.	5643047
OHNISHI62	OHNISHI E, MACLEOD H, HOROWITZ NH, "Mutants of Neurospora deficient in D-amino acid oxidase.", J Biol Chem 237;138-42.	14481396
Davis00	Davis, Rowland H, "Neurospora: Contributions of a Model Organism", Oxford University Press.		http://books.google.com/books?id=mLOMPN20MD8C&lpg=PP1&dq=neurospora%3A%20contributions%20of%20a%20model%20organism&pg=PP1#v=onepage&q&f=false
Baker68	Baker TI, "Phenylalanine-Tyrosine Biosynthesis in NEUROSPORA CRASSA.", Genetics 58(3);351-9.	17248403
Nazario71	Nazario M, Kinsey JA, Ahmad M, "Neurospora mutant deficient in tryptophanyl-transfer ribonucleic acid synthetase activity.", J Bacteriol 105(1);121-6.	5540999
Ahmad60	Ahmad, et al., "Physiological diversity amongst tryptophan mutants in <i>Neurospora crassa</i>.", Heredity 15.		http://bioinformatics.leeds.ac.uk/~gen6ar/newgenelist/database.cgi?ref=11
FLAVIN60	FLAVIN M, SLAUGHTER C, "Purification and properties of threonine synthetase of Neurospora.", J Biol Chem 235;1103-8.	13823379
Akiyama96	Akiyama M, Nakashima H, "Molecular cloning of thi-4, a gene necessary for the biosynthesis of thiamine in Neurospora crassa.", Curr Genet 30(1);62-7.	8662211
TATUM46	TATUM EL, BELL TT, "Neurospora: biosynthesis of thiamin.", Am J Bot 33(1);15-20.	20280135
Garnjobst56	Garnjobst, et al., "A temperature-independent riboflavin-requiring mutant of <i>Neurospora crassa </i>", Am. J. Bot. 43.		http://bioinformatics.leeds.ac.uk/~gen6ar/newgenelist/database.cgi?ref=718
Colburn65	Colburn, et al., "Studies of a phenylalanine tyrosine requiring mutant of <I>Neurospora crassa</I> (strain S4342)", Biochem. Biophys. Acta 97.		http://bioinformatics.leeds.ac.uk/~gen6ar/newgenelist/database.cgi?ref=396
Gaertner81	Gaertner, et al., "A response to a letter from David Perkins concerning the question of whether <I>nt</I> mutants involve tryptophan pyrrolase.", Neurospora Newsl. 28.		http://bioinformatics.leeds.ac.uk/~gen6ar/newgenelist/database.cgi?ref=702
Yanofsky50	Yanofsky C, Bonner DM, "Evidence for the Participation of Kynurenine as a Normal Intermediate in the Biosynthesis of Niacin in Neurospora.", Proc Natl Acad Sci U S A 36(3);167-76.	16588968
Bonner49	Bonner, et al., "Quinolinic acid accumulation in the conversion of 3-hydroxyanthranilic acid to niacin in Neurospora", Proc. Natl. Acad. Sci. U.S.A. <b>35</b>.		http://bioinformatics.leeds.ac.uk/~gen6ar/newgenelist/database.cgi?ref=195
Murray60	Murray, et al., "The distribution of methionine loci in <I>Neurospora crassa</I>.", Heredity 15.		http://bioinformatics.leeds.ac.uk/~gen6ar/newgenelist/database.cgi?ref=1411
Horowitz47	Horowitz, et al., "Methionine synthesis in Neurospora.", J. Biol. Chem. 171.		http://bioinformatics.leeds.ac.uk/~gen6ar/newgenelist/database.cgi?ref=893
TRUPIN65	TRUPIN JS, BROQUIST HP, "SACCHAROPINE, AN INTERMEDIATE OF THE AMINOADIPIC ACID PATHWAY OF LYSINE BIOSYNTHESIS. I. STUDIES IN NEUROSPORA CRASSA.", J Biol Chem 240;2524-30.	14304863
Regnery44	Regnery, et al., "A leucineless mutant strain of <I>Neurospora crassa</I>", J. Biol. Chem. 154.		http://bioinformatics.leeds.ac.uk/~gen6ar/newgenelist/database.cgi?ref=1705
TEAS48	TEAS HJ, HOROWITZ NH, FLING M, "Homoserine as a precursor of threonine and methionine in Neurospora.", J Biol Chem 172(2);651-8.	18901184
Davila83	Davila G, Brom S, Mora Y, Palacios R, Mora J, "Genetic and biochemical characterization of glutamine synthetase from Neurospora crassa glutamine auxotrophs and their revertants.", J Bacteriol 156(3);993-1000.	6139363
LEINWEBER65	LEINWEBER FJ, MONTY KJ, "CYSTEINE BIOSYNTHESIS IN NEUROSPORA CRASSA. I. THE METABOLISM OF SULFITE, SULFIDE, AND CYSTEINESULFINIC ACID.", J Biol Chem 240;782-7.	14275135
Murray65	Murray NE, "Cysteine mutant strains of Neurospora.", Genetics 52(4);801-8.	5826323
Tanenbaum54	Tanenbaum, et al., "A mutant of Neurospora requiring asparagine for growth", Am. J. Bot. 41.		http://bioinformatics.leeds.ac.uk/~gen6ar/newgenelist/database.cgi?ref=2048
Davis79	Davis RH, "Genetics of arginine biosynthesis in Neurospora crassa.", Genetics 93(3);557-75.	161750
WOODWARD64	WOODWARD VW, SCHWARZ P, "NEUROSPORA MUTANTS LACKING ORNITHINE TRANSCARBAMYLASE.", Genetics 49;845-53.	14158616
NEWMEYER57	NEWMEYER D, "Arginine synthesis in Neurospora crassa; Genetic studies.", J Gen Microbiol 16(2);449-62.	13416522
Srb44	Srb, et al., "The ornithine cycle in <I>Neurospora</I> and its genetic control.", J. Biol. Chem. 154.		http://bioinformatics.leeds.ac.uk/~gen6ar/newgenelist/database.cgi?ref=1968
Giles57	Giles NH, Partridge CW, Nelson NJ, "THE GENETIC CONTROL OF ADENYLOSUCCINASE IN Neurospora Crassa.", Proc Natl Acad Sci U S A 43(4);305-17.	16578469
Kuwana79	Kuwana, H, Okumura, R, "Genetics and some characteristics of acetate-requiring strains in <i>Neurospora crassa</i>", Japanese Journal of Genetics.		http://www.journalarchive.jst.go.jp/jnlpdf.php?cdjournal=ggs1921&cdvol=54&noissue=4&startpage=235&lang=en&from=jnltoc
Nishikawa85	Nishikawa, K, Kuwana, H, "Deficiency of glucose-6-phosphate dehydrogenase in <i>ace-7</i> strains of <i>Neurospora crassa</i>", Japanese Journal of Genetics.		https://www.jstage.jst.go.jp/article/ggs1921/60/1/60_1_39/_pdf
Kuwana79	Kuwana, et al., "Genetics and some characteristics of acetate-requiring strains in <I>Neurospora crassa</I>.", Jpn. J. Genet. 54.		http://bioinformatics.leeds.ac.uk/~gen6ar/newgenelist/database.cgi?ref=1122
Kuwana83	Kuwana, H, Kubota, M, "Pyruvate kinase-deficiency in a new acetate-requiring mutant, ace-8, of Neurospora crassa.", Japanese Journal of Genetics, v. 58 (6).		https://www.jstage.jst.go.jp/article/ggs1921/58/6/58_6_579/_pdf
